# Supplementary material for: Unravelling Genetic Determinants of Shell Thickness in Groundnut: Insights from a Genome-Wide Association Study
Source: Research Square preprint supplement (doi:10.21203/rs.3.rs-6967967/v1), 2025-07-03
Supplement: Supplementary file 1 [file 38d623ed3a2358cf70ff164d.xlsx]

## Sheet: Rainy 2022
Supplementary Table S2: BLUE and BLUP values for shell thickness in MAGIC population during rainy 2022
ENO	ENTRY	ETYPE	BLUP				BLUE
			predicted.value T1	predicted.value T2	predicted.value T3		predicted.value T1	predicted.value T2	predicted.value T3
1	ICGR 171002	T	0.721037	0.822231	0.918974		0.702498	0.759746	0.881522
2	ICGR 171003	T	0.992325	1.0936	1.19047		0.927867	1.08783	1.30854
3	ICGR 171004	T	0.635592	0.736925	0.833571		0.585723	0.742284	0.793975
4	ICGR 171005	T	0.742416	0.84392	0.940515		0.651413	0.910383	0.912443
5	ICGR 171008	T	0.789477	0.890748	0.987485		0.742842	0.91953	1.05707
6	ICGR 171009	T	1.08401	1.18532	1.28207		1.02674	1.19218	1.30378
7	ICGR 171010	T	0.544478	0.645792	0.742475		0.489061	0.641121	0.665204
8	ICGR 171011	T	0.710499	0.811449	0.908163		0.766867	0.77642	0.829182
9	ICGR 171012	T	1.07858	1.17985	1.27662		1.0757	1.20011	1.34722
10	ICGR 171013	T	0.678081	0.77914	0.875912		0.726424	0.706462	0.796662
11	ICGR 171014	T	0.545952	0.647176	0.743804		0.510494	0.610873	0.591897
12	ICGR 171015	T	0.604423	0.705611	0.802418		0.615851	0.647413	0.745736
13	ICGR 171016	T	0.919515	1.02082	1.11754		0.866229	1.02837	1.13902
14	ICGR 171017	T	1.15132	1.25248	1.34892		1.34476	1.40774	1.17672
15	ICGR 171018	T	0.869426	0.970276	1.06693		0.982747	0.965158	0.971282
16	ICGR 171020	T	1.00768	1.10884	1.20574		1.02349	1.06105	1.31575
17	ICGR 171021	T	1.01965	1.12077	1.21755		1.05117	1.10537	1.22964
18	ICGR 171022	T	0.958632	1.06007	1.15699		0.814082	1.06415	1.3617
19	ICGR 171023	T	1.0326	1.13397	1.23068		0.981585	1.13626	1.22745
20	ICGR 171024	T	1.06	1.16134	1.25771		1.073	1.20993	1.19254
21	ICGR 171025	T	0.893307	0.9947	1.09132		0.882205	1.08271	1.03258
22	ICGR 171026	T	0.742161	0.843258	0.940031		0.811495	0.786969	0.844913
23	ICGR 171027	T	0.875087	0.97618	1.07291		0.935009	0.924721	0.987114
24	ICGR 171028	T	1.00086	1.1022	1.1989		0.956424	1.12871	1.17025
25	ICGR 171029	T	1.17503	1.27635	1.37309		1.16778	1.33011	1.47387
26	ICGR 171030	T	0.747755	0.848887	0.945451		0.779856	0.84594	0.809709
27	ICGR 171031	T	0.695782	0.796848	0.893628		0.702668	0.756729	0.826369
28	ICGR 171032	T	1.07245	1.1738	1.27053		1.06118	1.23989	1.28169
29	ICGR 171033	T	1.3756	1.47695	1.57321		1.44713	1.5771	1.48546
30	ICGR 171034	T	1.11102	1.21242	1.30913		1.05651	1.27109	1.36116
31	ICGR 171035	T	0.781114	0.882083	0.978822		0.901098	0.82862	0.892366
32	ICGR 171036	T	0.904802	1.00612	1.10287		0.891607	1.04905	1.18101
33	ICGR 171037	T	0.868471	0.969632	1.06634		0.919442	0.962959	1.03558
34	ICGR 171038	T	0.442042	0.543118	0.640002		0.459042	0.440522	0.577636
35	ICGR 171039	T	0.706571	0.807516	0.904395		0.778985	0.706453	0.891313
36	ICGR 171040	T	0.953759	1.05516	1.15171		0.952856	1.12428	1.17969
37	ICGR 171041	T	0.834732	0.936183	1.03299		0.740523	0.995455	1.17763
38	ICGR 171042	T	0.861994	0.963333	1.06011		0.824735	0.98714	1.10906
39	ICGR 171043	T	0.981345	1.08252	1.17932		1.02944	1.10562	1.23798
40	ICGR 171044	T	0.588801	0.689737	0.786791		0.56658	0.555589	0.812394
41	ICGR 171045	T	0.817814	0.91916	1.01583		0.812371	0.967064	1.0566
42	ICGR 171046	T	0.909969	1.01117	1.10802		0.849074	0.945543	1.14003
43	ICGR 171049	T	0.983853	1.08505	1.18181		0.989543	1.09812	1.19945
44	ICGR 171050	T	0.650901	0.752129	0.84881		0.681515	0.775744	0.817357
45	ICGR 171051	T	1.03601	1.1372	1.23393		1.08588	1.12495	1.23453
46	ICGR 171052	T	0.465591	0.566992	0.663723		0.428773	0.610039	0.746697
47	ICGR 171053	T	0.731193	0.832304	0.929035		0.776204	0.807197	0.988279
48	ICGR 171054	T	1.02063	1.12197	1.21863		0.938257	1.10131	1.14293
49	ICGR 171055	T	1.13107	1.23225	1.32872		1.20086	1.2729	1.28727
50	ICGR 171056	T	0.771218	0.87223	0.969095		0.852442	0.822986	0.961526
51	ICGR 171057	T	0.50915	0.610505	0.707126		0.443753	0.602304	0.608933
52	ICGR 171058	T	0.540672	0.642006	0.738638		0.52078	0.670492	0.698007
53	ICGR 171059	T	0.882029	0.98336	1.0801		0.850079	1.03002	1.08812
54	ICGR 171060	T	0.988014	1.08938	1.18603		0.932879	1.11565	1.16207
55	ICGR 171061	T	0.698395	0.799628	0.896319		0.730606	0.774616	0.852865
56	ICGR 171062	T	1.07812	1.17953	1.27641		1.04486	1.2338	1.49986
57	ICGR 171063	T	1.0982	1.19948	1.29625		1.0908	1.22631	1.38437
58	ICGR 171064	T	0.995775	1.09713	1.1939		0.988445	1.13765	1.29155
59	ICGR 171065	T	0.712001	0.813459	0.90982		0.69386	0.944189	0.722854
60	ICGR 171066	T	1.00607	1.10732	1.20403		0.916384	1.05641	1.13862
61	ICGR 171067	T	0.842151	0.943311	1.04018		0.893327	0.905906	1.11266
62	ICGR 171068	T	0.74414	0.844668	0.941453		0.875941	0.752546	0.808715
63	ICGR 171070	T	0.896001	0.997273	1.09391		0.95486	1.09517	1.13793
64	ICGR 171071	T	1.08513	1.18628	1.28304		1.18527	1.20571	1.30446
65	ICGR 171072	T	1.03876	1.14003	1.2367		1.05937	1.18995	1.21941
66	ICGR 171073	T	0.696518	0.79771	0.894615		0.689805	0.765532	0.908377
67	ICGR 171074	T	0.790749	0.891927	0.988701		0.769233	0.852066	0.946647
68	ICGR 171075	T	0.689562	0.790785	0.887529		0.681559	0.796485	0.906028
69	ICGR 171076	T	0.628559	0.729504	0.826269		0.650522	0.652221	0.736286
70	ICGR 171077	T	1.10925	1.21076	1.30741		0.99976	1.3303	1.48292
71	ICGR 171079	T	0.69469	0.795899	0.892711		0.724393	0.812322	0.941318
72	ICGR 171080	T	0.936831	1.03829	1.13475		0.925781	1.07687	1.04352
73	ICGR 171081	T	1.14372	1.2453	1.34191		1.05066	1.37605	1.38638
74	ICGR 171082	T	1.05339	1.15461	1.25129		1.10515	1.18251	1.16506
75	ICGR 171083	T	0.586966	0.68831	0.784965		0.525432	0.691857	0.704585
76	ICGR 171084	T	0.415333	0.516355	0.613414		0.372814	0.380461	0.712999
77	ICGR 171085	T	0.884083	0.9852	1.08186		0.917474	0.980305	1.00835
78	ICGR 171086	T	0.834784	0.936134	1.03287		0.793607	0.96565	1.04567
79	ICGR 171087	T	1.14652	1.24813	1.34487		1.10635	1.33522	1.45925
80	ICGR 171088	T	1.05484	1.15622	1.25311		0.942526	1.17457	1.47003
81	ICGR 171089	T	1.01263	1.11399	1.21062		0.97171	1.17506	1.25012
82	ICGR 171093	T	0.714671	0.81599	0.912591		0.751115	0.874155	0.91531
83	ICGR 171094	T	1.13698	1.23822	1.33521		1.09654	1.2374	1.57332
84	ICGR 171095	T	1.20886	1.31011	1.40683		1.22531	1.32271	1.42042
85	ICGR 171096	T	0.676071	0.777203	0.874008		0.734981	0.754884	0.89366
86	ICGR 171098	T	0.787503	0.888751	0.98542		0.750264	0.855203	0.919154
87	ICGR 171099	T	0.882855	0.984243	1.08082		0.898951	1.08831	1.03156
88	ICGR 171100	T	1.1262	1.22754	1.32425		1.09209	1.23249	1.33601
89	ICGR 171101	T	1.15981	1.26112	1.35831		1.07965	1.23433	1.54048
90	ICGR 171102	T	1.01971	1.12114	1.21777		0.951715	1.19341	1.29982
91	ICGR 171103	T	0.847967	0.949139	1.04602		0.833619	0.890753	1.10358
92	ICGR 171104	T	0.813116	0.91436	1.01117		0.770036	0.873105	0.959099
93	ICGR 171105	T	0.998191	1.0995	1.19633		1.02404	1.1299	1.24091
94	ICGR 171106	T	1.03106	1.13225	1.22912		1.02847	1.14764	1.39247
95	ICGR 171107	T	1.08079	1.18199	1.27898		1.07278	1.14037	1.48776
96	ICGR 171108	T	0.928793	1.03	1.12665		0.960713	1.0484	1.06592
97	ICGR 171109	T	1.04303	1.14463	1.24114		0.935174	1.27518	1.24187
98	ICGR 171110	T	0.425089	0.526166	0.622956		0.503445	0.506417	0.618368
99	ICGR 171112	T	0.902017	1.003	1.09952		0.98591	0.998442	0.935364
100	ICGR 171113	T	0.66764	0.768604	0.865382		0.712498	0.620329	0.727291
101	ICGR 171116	T	0.81921	0.920267	1.01697		0.929524	0.910418	0.89238
102	ICGR 171117	T	1.25422	1.35543	1.45207		1.27103	1.37721	1.44447
103	ICGR 171118	T	1.05435	1.15573	1.25273		1.05163	1.20369	1.41529
104	ICGR 171119	T	0.888022	0.989395	1.08612		0.834648	1.02976	1.10356
105	ICGR 171120	T	0.928234	1.02937	1.12612		0.992037	1.01567	1.12534
106	ICGR 171121	T	0.701457	0.802713	0.899642		0.567569	0.743228	0.996806
107	ICGR 171122	T	1.0472	1.14825	1.24501		1.04201	1.02552	1.12461
108	ICGR 171123	T	0.70529	0.806607	0.903225		0.584617	0.736277	0.75597
109	ICGR 171124	T	0.700768	0.801928	0.898609		0.790756	0.841253	0.833203
110	ICGR 171126	T	0.938916	1.03979	1.13685		0.944915	0.931204	1.17882
111	ICGR 171127	T	0.753374	0.854633	0.951275		0.76512	0.88306	0.888536
112	ICGR 171128	T	0.628287	0.72944	0.826143		0.599888	0.681031	0.721126
113	ICGR 171129	T	0.402479	0.50346	0.600222		0.480344	0.426027	0.488265
114	ICGR 171131	T	1.01964	1.12091	1.21754		1.07639	1.17475	1.14587
115	ICGR 171132	T	0.725538	0.826896	0.923386		0.749017	0.910906	0.737565
116	ICGR 171133	T	0.480078	0.581022	0.678024		0.51868	0.440649	0.715762
117	ICGR 171134	T	0.954974	1.05615	1.15292		0.98712	1.04098	1.18441
118	ICGR 171135	T	0.517283	0.618459	0.715123		0.533264	0.612384	0.637228
119	ICGR 171136	T	0.830081	0.931435	1.02811		0.831931	0.985394	1.12117
120	ICGR 171137	T	0.659805	0.760991	0.857769		0.663518	0.74012	0.867697
121	ICGR 171138	T	0.986721	1.08825	1.18502		0.939693	1.12595	1.25576
122	ICGR 171139	T	0.933363	1.03469	1.13147		0.905664	1.08766	1.22261
123	ICGR 171140	T	0.848496	0.949629	1.0464		0.92874	1.00025	1.10107
124	ICGR 171141	T	0.899544	1.00069	1.09753		0.90404	0.946136	1.17113
125	ICGR 171142	T	1.06641	1.16775	1.26458		0.99378	1.19262	1.47977
126	ICGR 171143	T	0.770033	0.871079	0.967913		0.875717	0.865013	1.02947
127	ICGR 171144	T	0.668779	0.76989	0.866661		0.681131	0.707537	0.816056
128	ICGR 171145	T	0.70612	0.807344	0.904116		0.69193	0.797966	0.990723
129	ICGR 171146	T	1.01969	1.12074	1.21762		1.0733	1.03768	1.21149
130	ICGR 171147	T	0.688875	0.790104	0.886902		0.641613	0.755925	0.879708
131	ICGR 171148	T	0.654503	0.755696	0.852445		0.633156	0.697914	0.81088
132	ICGR 171149	T	0.978651	1.07988	1.17682		0.942717	1.02381	1.27954
133	ICGR 171150	T	0.654994	0.75626	0.852987		0.599709	0.719937	0.813735
134	ICGR 171151	T	1.19153	1.29288	1.38979		1.12959	1.2911	1.55013
135	ICGR 171152	T	1.32808	1.42939	1.52608		1.33364	1.49293	1.61509
136	ICGR 171153	T	1.00518	1.10648	1.20321		0.92492	1.11011	1.24538
137	ICGR 171154	T	0.951919	1.05313	1.15006		0.955614	1.00264	1.26118
138	ICGR 171155	T	1.1754	1.27659	1.37337		1.21631	1.30039	1.43767
139	ICGR 171156	T	0.536308	0.637456	0.734137		0.558648	0.647648	0.706404
140	ICGR 171157	T	0.723545	0.824862	0.921746		0.643425	0.764783	0.947829
141	ICGR 171158	T	0.841137	0.942124	1.03896		0.927123	0.942179	1.03127
142	ICGR 171159	T	0.552884	0.654327	0.751237		0.325775	0.577267	0.817532
143	ICGR 171160	T	0.619542	0.720791	0.817494		0.576374	0.659562	0.730791
144	ICGR 171161	T	0.668356	0.769659	0.866391		0.677257	0.803887	0.912446
145	ICGR 171162	T	0.801901	0.903241	0.99975		0.790162	0.917886	0.819242
146	ICGR 171163	T	0.669917	0.771161	0.867829		0.681841	0.80966	0.883048
147	ICGR 171164	T	0.353937	0.455049	0.55168		0.377733	0.421238	0.396307
148	ICGR 171165	T	0.528946	0.630318	0.727046		0.505157	0.655206	0.771211
149	ICGR 171166	T	0.62863	0.7299	0.826564		0.616821	0.781269	0.789674
150	ICGR 171167	T	0.689495	0.790666	0.887347		0.73709	0.819646	0.809761
151	ICGR 171168	T	0.69768	0.798992	0.8958		0.614739	0.782272	0.9913
152	ICGR 171169	T	0.859138	0.960438	1.05742		0.790957	0.939885	1.24121
153	ICGR 171170	T	0.638834	0.739974	0.836878		0.634862	0.709065	0.844711
154	ICGR 171171	T	0.614052	0.715199	0.811936		0.633183	0.694879	0.789324
155	ICGR 171172	T	0.876649	0.977486	1.07393		1.00475	0.981409	0.899618
156	ICGR 171173	T	0.731913	0.832816	0.929589		0.845216	0.750835	0.837548
157	ICGR 171174	T	0.953001	1.05431	1.15096		0.936225	1.10415	1.12742
158	ICGR 171175	T	0.745429	0.846885	0.943595		0.665124	0.867278	0.960014
159	ICGR 171176	T	0.986642	1.08798	1.18472		0.981773	1.1341	1.23796
160	ICGR 171177	T	1.07173	1.17306	1.2699		0.992165	1.18546	1.41627
161	ICGR 171178	T	0.762296	0.863436	0.960216		0.816141	0.796914	0.854762
162	ICGR 171179	T	0.801993	0.903094	0.999902		0.862767	0.896269	0.991866
163	ICGR 171180	T	1.0293	1.13075	1.22741		0.999895	1.23525	1.30169
164	ICGR 171181	T	0.910441	1.0116	1.10849		0.890297	0.976306	1.11811
165	ICGR 171182	T	1.00181	1.10305	1.19972		1.01443	1.13563	1.17554
166	ICGR 171183	T	0.681982	0.783226	0.879906		0.68911	0.78147	0.83811
167	ICGR 171184	T	1.4764	1.57734	1.67441		1.5429	1.42703	1.77213
168	ICGR 171185	T	0.850866	0.952081	1.049		0.819989	0.894805	1.09581
169	ICGR 171186	T	0.872307	0.973628	1.07033		0.843343	1.00096	1.10191
170	ICGR 171187	T	0.546594	0.647823	0.744448		0.606145	0.683179	0.640652
171	ICGR 171188	T	0.772437	0.873796	0.970622		0.754329	0.890736	1.01445
172	ICGR 171189	T	0.628787	0.730097	0.826825		0.583242	0.729535	0.803713
173	ICGR 171190	T	1.12727	1.22851	1.32543		1.14559	1.26032	1.50414
174	ICGR 171191	T	1.11479	1.21651	1.31275		1.08525	1.33842	1.19693
175	ICGR 171192	T	0.792298	0.893649	0.990695		0.666272	0.860051	1.24855
176	ICGR 171193	T	0.911743	1.01293	1.10969		0.918845	1.01029	1.13348
177	ICGR 171194	T	1.11327	1.21447	1.31117		1.16405	1.25818	1.34112
178	ICGR 171196	T	0.793928	0.895261	0.992066		0.730142	0.928565	1.13139
179	ICGR 171197	T	0.983399	1.08477	1.18166		0.936515	1.07592	1.25425
180	ICGR 171198	T	1.05854	1.15971	1.25664		1.02411	1.08437	1.28085
181	ICGR 171199	T	0.721172	0.822286	0.919007		0.789254	0.83068	0.908574
182	ICGR 171200	T	0.593342	0.694851	0.79146		0.43439	0.767405	0.83774
183	ICGR 171201	T	0.964998	1.06633	1.16305		0.943216	1.08647	1.20225
184	ICGR 171202	T	0.865323	0.966442	1.06312		0.87681	0.939147	0.977942
185	ICGR 171203	T	0.651642	0.752969	0.849829		0.566248	0.738568	0.967141
186	ICGR 171205	T	0.72134	0.822577	0.919219		0.691844	0.783728	0.800408
187	ICGR 171206	T	0.711811	0.813149	0.910012		0.650603	0.785453	0.962049
188	ICGR 171207	T	0.735524	0.836595	0.93341		0.758686	0.756394	0.880056
189	ICGR 171208	T	0.785233	0.886426	0.98323		0.763103	0.843207	1.03083
190	ICGR 171209	T	0.704457	0.805762	0.902344		0.697927	0.856822	0.799391
191	ICGR 171210	T	0.722872	0.824143	0.920894		0.680183	0.813564	0.940612
192	ICGR 171211	T	0.931526	1.03282	1.12937		0.957981	1.03087	1.01751
193	ICGR 171212	T	0.953978	1.05522	1.15205		0.945101	1.03343	1.17765
194	ICGR 171214	T	0.88266	0.983935	1.08078		0.860053	0.953238	1.13513
195	ICGR 171215	T	0.907836	1.0089	1.10582		0.921912	0.956598	1.09483
196	ICGR 171216	T	0.627366	0.728663	0.825435		0.609327	0.758206	0.879286
197	ICGR 171217	T	0.890189	0.991501	1.08816		0.854782	0.982085	1.03384
198	ICGR 171218	T	0.70059	0.801923	0.898555		0.699606	0.839476	0.885881
199	ICGR 171220	T	1.05196	1.1531	1.24979		1.09223	1.1335	1.17523
200	ICGR 171222	T	0.799479	0.900608	0.997477		0.802651	0.794909	0.95406
201	ICGR 171223	T	0.661109	0.762116	0.858935		0.69583	0.757525	0.889272
202	ICGR 171224	T	0.848736	0.949968	1.04671
203	ICGR 171225	T	0.770175	0.871649	0.96815		0.663529	0.922996	0.838764
204	ICGR 171226	T	0.507616	0.608548	0.705289		0.576547	0.464368	0.555753
205	ICGR 171227	T	0.815848	0.917073	1.01384		0.852422	0.938456	1.0657
206	ICGR 171228	T	0.818498	0.919828	1.0165		0.84103	0.97195	1.03021
207	ICGR 171229	T	0.919903	1.0212	1.11771		0.977233	1.14518	1.03862
208	ICGR 171230	T	0.765112	0.866463	0.963407		0.75281	0.886846	1.05559
209	ICGR 171231	T	0.956162	1.05741	1.15422		0.977819	1.08864	1.23693
210	ICGR 171232	T	0.767564	0.868796	0.965622		0.769012	0.860162	1.0065
211	ICGR 171233	T	1.17182	1.27306	1.36984		1.17949	1.30695	1.46607
212	ICGR 171235	T	0.557964	0.659176	0.755883		0.530162	0.629365	0.682896
213	ICGR 171236	T	1.0016	1.10273	1.19941		1.06938	1.11048	1.1265
214	ICGR 171237	T	0.748578	0.849672	0.946428		0.750685	0.823215	0.94257
215	ICGR 171238	T	1.03838	1.13955	1.23639		1.06585	1.14501	1.32687
216	ICGR 171239	T	0.660216	0.761374	0.858316		0.625476	0.685031	0.94792
217	ICGR 171240	T	0.664211	0.765354	0.862083		0.697349	0.738387	0.818578
218	ICGR 171241	T	0.73101	0.832233	0.928926		0.745865	0.829799	0.928914
219	ICGR 171242	T	0.561503	0.662809	0.759633		0.485506	0.590738	0.762399
220	ICGR 171243	T	0.905007	1.00625	1.10298		0.859502	0.957364	1.09892
221	ICGR 171244	T	0.581725	0.682872	0.779528		0.665321	0.703883	0.728635
222	ICGR 171245	T	0.672292	0.773781	0.870584		0.54251	0.81565	0.956875
223	ICGR 171246	T	0.876609	0.977899	1.07449		0.891877	0.999275	0.982995
224	ICGR 171247	T	0.513978	0.615238	0.711916		0.463785	0.598457	0.664332
225	ICGR 171248	T	0.935806	1.03724	1.13394		0.866409	1.09789	1.19709
226	ICGR 171249	T	0.926777	1.02794	1.12457		0.967554	1.02668	1.04969
227	ICGR 171250	T	0.862012	0.963121	1.0598		0.895334	0.946966	1.00771
228	ICGR 171251	T	0.875413	0.976775	1.07369		0.803346	0.981334	1.18783
229	ICGR 171252	T	1.09234	1.19358	1.29029		1.21727	1.28902	1.34952
230	ICGR 171253	T	1.09339	1.19454	1.29134		1.15859	1.2082	1.25781
231	ICGR 171254	T	1.18431	1.2863	1.38289		1.04055	1.39155	1.49429
232	ICGR 171255	T	1.03442	1.13557	1.23222		1.09594	1.14991	1.12598
233	ICGR 171256	T	0.733317	0.83435	0.931154		0.761018	0.755945	0.856416
234	ICGR 171257	T	0.987553	1.08896	1.18573		0.941738	1.13374	1.27144
235	ICGR 171258	T	0.913854	1.01527	1.11182		0.909043	1.07491	1.11082
236	ICGR 171259	T	0.608691	0.709711	0.806673		0.637	0.663671	0.823566
237	ICGR 171260	T	0.918109	1.0195	1.11625		0.874069	1.04108	1.18613
238	ICGR 171261	T	0.930558	1.0317	1.12846		0.948756	1.01814	1.11
239	ICGR 171262	T	0.779846	0.880933	0.97777		0.833161	0.846387	1.02109
240	ICGR 171263	T	0.687199	0.788253	0.885025		0.740408	0.716232	0.805677
241	ICGR 171264	T	0.920279	1.02171	1.11825		0.895912	1.06584	1.0927
242	ICGR 171265	T	0.633768	0.734982	0.831728		0.611482	0.723231	0.832326
243	ICGR 171266	T	1.00688	1.10821	1.20492		1.03773	1.16217	1.21898
244	ICGR 171267	T	1.22565	1.32702	1.42365		1.24146	1.42282	1.41991
245	ICGR 171268	T	0.907695	1.00879	1.10565		0.917793	0.954765	1.21105
246	ICGR 171269	T	0.954213	1.05541	1.15217		0.978674	1.06626	1.15692
247	ICGR 171270	T	0.872652	0.973773	1.07074		0.846052	0.886431	1.15698
248	ICGR 171271	T	0.93381	1.0351	1.13187		0.905663	1.03061	1.1541
249	ICGR 171272	T	0.985947	1.08713	1.1838		1.04267	1.06841	1.09239
250	ICGR 171273	T	0.786981	0.88818	0.984849		0.774456	0.864543	0.894106
251	ICGR 171274	T	1.01541	1.11662	1.21338		1.02535	1.12793	1.25323
252	ICGR 171275	T	0.928515	1.02981	1.12674		0.903388	1.00987	1.20133
253	ICGR 171276	T	0.735866	0.837265	0.93431		0.645334	0.786712	0.995672
254	ICGR 171277	T	0.635523	0.736632	0.833349		0.670137	0.724684	0.788203
255	ICGR 171278	T	0.798952	0.900379	0.997121		0.769935	0.945587	1.0461
256	ICGR 171279	T	0.890461	0.991648	1.08832		0.992092	1.03706	1.02419
257	ICGR 171280	T	0.852492	0.953555	1.05021		0.993116	0.970535	0.970358
258	ICGR 171281	T	1.31576	1.41686	1.51356		1.40905	1.42854	1.44311
259	ICGR 171282	T	0.87124	0.972325	1.06913		0.945874	0.976584	1.07389
260	ICGR 171283	T	0.609865	0.711112	0.80786		0.507426	0.641836	0.741524
261	ICGR 171284	T	0.88691	0.98856	1.08529		0.795181	1.00719	1.12443
262	ICGR 171285	T	0.800401	0.901657	0.998313		0.77367	0.885231	0.939056
263	ICGR 171286	T	0.760136	0.861254	0.957993		0.795121	0.835712	0.941095
264	ICGR 171288	T	1.07016	1.17129	1.26816		1.04875	1.08593	1.33103
265	ICGR 171289	T	0.532579	0.633683	0.730403		0.630567	0.66648	0.73025
266	ICGR 171290	T	0.891765	0.992945	1.0896		0.999501	1.07697	1.07827
267	ICGR 171291	T	1.05905	1.16023	1.25701		1.12067	1.19866	1.3418
268	ICGR 171292	T	1.08397	1.18538	1.28223		1.00849	1.18995	1.43167
269	ICGR 171293	T	1.03675	1.13758	1.23449		1.18871	1.05271	1.27453
270	ICGR 171295	T	0.604067	0.705017	0.801824		0.637602	0.6473	0.725657
271	ICGR 171296	T	0.651179	0.752395	0.849172		0.635889	0.697691	0.866888
272	ICGR 171297	T	0.894594	0.995719	1.09245		0.951876	0.935015	1.01219
273	ICGR 171298	T	1.1823	1.28355	1.38047		1.17193	1.2583	1.49972
274	ICGR 171299	T	0.609294	0.710658	0.807236		0.563807	0.716103	0.735826
275	ICGR 171300	T	0.622473	0.723526	0.820356		0.622845	0.624238	0.830153
276	ICGR 171301	T	0.845871	0.947238	1.04385		0.84086	1.04552	1.03482
277	ICGR 171302	T	0.777677	0.878848	0.975798		0.739209	0.825005	1.08681
278	ICGR 171303	T	0.698738	0.799877	0.896617		0.700695	0.739393	0.795781
279	ICGR 171304	T	0.690376	0.791676	0.888237		0.664276	0.814114	0.772
280	ICGR 171305	T	1.03656	1.13775	1.23458		1.03556	1.12868	1.24893
281	ICGR 171306	T	0.934238	1.03517	1.13228		0.960621	0.957201	1.1863
282	ICGR 171307	T	0.685915	0.787312	0.883895		0.649921	0.856948	0.844168
283	ICGR 171308	T	0.730675	0.831799	0.928627		0.749083	0.769782	0.89557
284	ICGR 171311	T	0.978652	1.07972	1.17648		1.03957	1.02273	1.17573
285	ICGR 171312	T	0.717665	0.818923	0.915537		0.765677	0.858227	0.81869
286	ICGR 171313	T	1.1348	1.23618	1.33305		1.04128	1.21253	1.45223
287	ICGR 171314	T	0.544931	0.646088	0.742823		0.533508	0.618152	0.722666
288	ICGR 171315	T	0.772382	0.873596	0.970605		0.74716	0.847386	1.05497
289	ICGR 171316	T	0.755137	0.856402	0.953285		0.719157	0.85128	1.0793
290	ICGR 171317	T	0.750463	0.851717	0.948264		0.784561	0.880725	0.861706
291	ICGR 171318	T	0.933751	1.03504	1.13173		0.935359	1.07155	1.16067
292	ICGR 171320	T	0.688144	0.789541	0.886099		0.698422	0.884706	0.783364
293	ICGR 171321	T	0.925902	1.02726	1.12392		0.93373	1.15148	1.20571
294	ICGR 171322	T	0.75345	0.854673	0.951569		0.70754	0.790541	1.0447
295	ICGR 171323	T	0.894109	0.995469	1.09227		0.828476	0.998636	1.15096
296	ICGR 171324	T	0.713328	0.814236	0.911041		0.764225	0.770547	0.871716
297	ICGR 171325	T	0.539867	0.640888	0.737717		0.591587	0.578585	0.744261
298	ICGR 171326	T	0.720331	0.821837	0.918151		0.649442	0.936958	0.685331
299	ICGR 171327	T	0.750487	0.851647	0.94846		0.802801	0.856352	0.946852
300	ICGR 171328	T	0.734592	0.835674	0.932652		0.765971	0.769387	1.0117
301	ICGR 171329	T	0.818619	0.919972	1.01701		0.785428	0.933968	1.17266
302	ICGR 171330	T	1.1934	1.29461	1.39136		1.24679	1.33632	1.46681
303	ICGR 171331	T	0.590643	0.691714	0.788315		0.686937	0.689406	0.63355
304	ICGR 171332	T	0.793127	0.894437	0.991317		0.741299	0.871686	1.04771
305	ICGR 171334	T	0.481527	0.5827	0.679309		0.48733	0.549935	0.529054
306	ICGR 171335	T	0.862442	0.963639	1.0606		0.849419	0.925855	1.07902
307	ICGR 171336	T	0.804853	0.906075	1.00295		0.787391	0.83551	1.06325
308	ICGR 171337	T	0.671234	0.772466	0.869255		0.696767	0.793759	0.918301
309	ICGR 171338	T	0.700807	0.802039	0.898623		0.703488	0.818339	0.860947
310	ICGR 171339	T	0.793052	0.894418	0.991299		0.682455	0.871025	1.09678
311	ICGR 171340	T	0.991506	1.09256	1.18945		1.05803	1.03288	1.19298
312	ICGR 171341	T	1.11396	1.21549	1.31208		1.07132	1.269	1.32072
313	ICGR 171343	T	1.10984	1.21116	1.30778		1.07685	1.28529	1.27288
314	ICGR 171345	T	0.741271	0.842388	0.939165		0.811727	0.803127	0.874091
315	ICGR 171347	T	1.39212	1.49362	1.59018		1.37904	1.64214	1.63087
316	ICGR 171348	T	0.999038	1.1001	1.19677		1.09005	1.05727	1.10643
317	ICGR 171349	T	0.842648	0.944025	1.04063		0.863913	1.0133	1.0835
318	ICGR 171350	T	0.970508	1.07185	1.16855		0.96595	1.14519	1.1588
319	ICGR 171351	T	0.558636	0.659824	0.756809		0.581628	0.582442	0.883448
320	ICGR 171352	T	0.776054	0.877168	0.973926		0.826304	0.859645	0.986229
321	ICGR 171353	T	0.653234	0.754687	0.851415		0.531974	0.750598	0.83559
322	ICGR 171354	T	0.38929	0.490489	0.587131		0.368091	0.396905	0.436197
323	ICGR 171355	T	0.776433	0.877496	0.97445		0.754916	0.810412	0.996259
324	ICGR 171356	T	0.912364	1.01369	1.11023		0.925101	1.06564	1.04614
325	ICGR 171358	T	0.932265	1.0335	1.13015		0.973214	1.057	1.13295
326	ICGR 171360	T	0.906396	1.00749	1.10426		0.908438	0.979567	1.10905
327	ICGR 171361	T	1.12819	1.22933	1.32615		1.16473	1.18985	1.34278
328	ICGR 171362	T	1.01914	1.12046	1.21726		0.952294	1.13514	1.29834
329	ICGR 171363	T	0.979756	1.08106	1.17778		0.902159	1.04616	1.13333
330	ICGR 171364	T	1.34765	1.44893	1.54571		1.34392	1.47369	1.62505
331	ICGR 171365	T	0.888789	0.990018	1.08672		0.894251	0.99951	1.09354
332	ICGR 171366	T	0.593932	0.695014	0.791697		0.669523	0.635535	0.656269
333	ICGR 171367	T	0.707535	0.808577	0.905283		0.815908	0.815558	0.934929
334	ICGR 171368	T	1.2089	1.31014	1.40691		1.29615	1.31012	1.43107
335	ICGR 171369	T	0.982297	1.08356	1.18021		0.986567	1.1065	1.13363
336	ICGR 171370	T	0.718539	0.819682	0.916623		0.715524	0.778248	0.981562
337	ICGR 171371	T	0.629236	0.730538	0.827177		0.61546	0.760322	0.757057
338	ICGR 171372	T	0.670696	0.771911	0.868651		0.620458	0.740895	0.819856
339	ICGR 171373	T	0.905658	1.00697	1.10367		0.882816	1.06451	1.09209
340	ICGR 171374	T	0.675752	0.77694	0.873622		0.689135	0.75266	0.847457
341	ICGR 171375	T	1.11762	1.2187	1.31554		1.16283	1.18418	1.42421
342	ICGR 171376	T	1.04968	1.15114	1.24781		1.01171	1.16285	1.28047
343	ICGR 171377	T	0.670882	0.772063	0.868724		0.678191	0.760473	0.802605
344	ICGR 171378	T	0.750076	0.851522	0.948244		0.64735	0.883343	0.981102
345	ICGR 171379	T	0.55632	0.657482	0.754324		0.516885	0.645435	0.774329
346	ICGR 171380	T	0.493583	0.594762	0.69153		0.482195	0.549754	0.61845
347	ICGR 171381	T	0.895368	0.996698	1.09337		0.888164	1.05395	1.12325
348	ICGR 171382	T	1.37922	1.48056	1.57734		1.3632	1.50083	1.66678
349	ICGR 171383	T	1.21798	1.31956	1.41583		1.19454	1.39737	1.31202
350	ICGR 171384	T	0.831434	0.932743	1.02939		0.82269	0.981214	0.983627
351	ICGR 171385	T	1.10207	1.20343	1.30021		1.05367	1.21414	1.32736
352	ICGR 171386	T	1.25002	1.35135	1.44798		1.3088	1.42525	1.4216
353	ICGR 171387	T	0.749946	0.851035	0.947829		0.766532	0.775637	0.896082
354	ICGR 171388	T	1.10155	1.20278	1.29945		1.1323	1.21525	1.26588
355	ICGR 171389	T	1.03756	1.13868	1.23539		1.20984	1.20247	1.27541
356	ICGR 171390	T	1.0504	1.15162	1.24822		1.09224	1.20254	1.16389
357	ICGR 171391	T	0.76474	0.865987	0.962937		0.685462	0.828042	1.15925
358	ICGR 171392	T	0.8833	0.984452	1.08121		0.908892	0.948676	1.05606
359	ICGR 171393	T	1.37763	1.47884	1.57559		1.42883	1.53616	1.61194
360	ICGR 171394	T	0.934223	1.03545	1.13231		0.92761	1.01686	1.2817
361	ICGR 171395	T	0.930199	1.03142	1.12814		0.907526	1.01239	1.13601
362	ICGR 171396	T	0.810533	0.911648	1.00824		0.863894	0.928555	0.952372
363	ICGR 171397	T	0.811387	0.912633	1.00962		0.755365	0.880198	1.16409
364	ICGR 171398	T	0.985212	1.08658	1.18332		0.970883	1.16543	1.24288
365	ICGR 171399	T	0.638561	0.739822	0.836561		0.604959	0.759037	0.908481
366	ICGR 171400	T	0.877912	0.979081	1.07579		0.886285	0.953702	1.06939
367	ICGR 171401	T	0.620391	0.721549	0.818435		0.613591	0.629034	0.832189
368	ICGR 171402	T	0.963649	1.0648	1.16158		0.994667	1.01686	1.10394
369	ICGR 171403	T	1.28147	1.38263	1.47944		1.29813	1.39752	1.52364
370	ICGR 171404	T	1.34192	1.44333	1.54017		1.26996	1.50332	1.70287
371	ICGR 171405	T	0.850775	0.952376	1.049		0.781819	0.989084	1.05526
372	ICGR 171406	T	0.727906	0.82915	0.926024		0.666527	0.784668	1.02084
373	ICGR 171407	T	0.975164	1.07665	1.17333		0.872682	1.14289	1.26399
374	ICGR 171408	T	0.616101	0.717224	0.813818		0.679552	0.736994	0.660014
375	ICGR 171409	T	1.1251	1.2264	1.3231		1.04857	1.19873	1.29712
376	ICGR 171410	T	0.523568	0.624544	0.721383		0.545035	0.574666	0.719805
377	ICGR 171412	T	0.591287	0.692399	0.789163		0.610006	0.661826	0.75856
378	ICGR 171413	T	1.11602	1.21704	1.31408		1.16726	1.17999	1.37698
379	ICGR 171414	T	0.946275	1.0475	1.14412		0.954116	1.06344	1.03273
380	ICGR 171415	T	1.21783	1.31949	1.41602		1.17564	1.42671	1.44715
381	ICGR 171417	T	1.08076	1.18176	1.27862		1.17858	1.16644	1.34964
382	ICGR 171418	T	0.57991	0.681107	0.777769		0.580974	0.672377	0.699498
383	ICGR 171421	T	0.489038	0.59026	0.687059		0.473049	0.556283	0.666758
384	ICGR 171422	T	0.993745	1.09503	1.1917		NA	1.14007	1.17706
385	ICGR 171423	T	0.72824	0.829477	0.926243		0.71161	0.830942	0.938766
386	ICGR 171425	T	0.948733	1.05005	1.1467		0.927928	1.033	1.10362
387	ICGR 171426	T	1.16481	1.26611	1.36288		1.11088	1.26159	1.40794
388	ICGR 171427	T	0.798165	0.899525	0.996151		0.774597	0.895915	0.944345
389	ICGR 171428	T	1.12919	1.23026	1.3271		1.23836	1.25033	1.39662
390	ICGR 171429	T	1.48363	1.58473	1.68151		1.56429	1.59074	1.76597
391	ICGR 171430	T	1.17708	1.27825	1.37513		1.21336	1.27465	1.55764
392	ICGR 171431	T	1.11016	1.21137	1.30822		1.09368	1.16994	1.39718
393	ICGR 171432	T	0.90712	1.00852	1.10504		0.886572	1.06258	1.12436
394	ICGR 171433	T	0.845833	0.947209	1.04423		0.777684	0.939213	1.1939
395	ICGR 171434	T	0.696722	0.797902	0.894428		0.739444	0.841307	0.784691
396	ICGR 171435	T	1.03769	1.13897	1.23566		1.00624	1.13011	1.19015
397	ICGR 171436	T	1.04849	1.14987	1.24657		1.02066	1.1963	1.28572
398	ICGR 171437	T	1.06089	1.16193	1.25902		1.09043	1.0643	1.46028
399	ICGR 171438	T	1.12291	1.22417	1.32091		1.12254	1.22212	1.30158
400	ICGR 171440	T	1.22005	1.32147	1.4182		1.13865	1.37931	1.5241
401	ICGR 171441	T	1.29409	1.39532	1.49214		1.31008	1.40337	1.56894
402	ICGR 171442	T	0.501349	0.602407	0.699316		0.506736	0.551233	0.708281
403	ICGR 171443	T	1.03303	1.13432	1.23097		1.07514	1.22304	1.19812
404	ICGR 171444	T	0.641307	0.742703	0.839245		0.626861	0.81178	0.766054
405	ICGR 171445	T	1.38631	1.48756	1.58425		1.43531	1.5551	1.63496
406	ICGR 171446	T	1.5365	1.638	1.73464		1.49555	1.76405	1.86391
407	ICGR 171447	T	0.962864	1.0641	1.16094		0.965643	1.07563	1.23399
408	ICGR 171448	T	1.0609	1.16197	1.25856		1.14581	1.1671	1.13041
409	ICGR 171449	T	0.995005	1.0962	1.19293		1.02347	1.08819	1.17772
410	ICGR 171450	T	0.846195	0.947507	1.04435		0.773347	0.933067	1.11068
411	ICGR 171451	T	0.984452	1.08595	1.18262		0.891325	1.16838	1.21119
412	ICGR 171452	T	0.89311	0.994564	1.09117		0.770744	1.01263	1.00569
413	ICGR 171453	T	1.08768	1.18903	1.28562		1.06229	1.24931	1.25643
414	ICGR 171454	T	0.926789	1.02793	1.12473		0.979894	0.984105	1.10418
415	ICGR 171455	T	0.647456	0.748645	0.845353		0.634378	0.699791	0.730888
416	ICGR 171456	T	0.695957	0.797105	0.893741		0.726181	0.791568	0.795216
417	ICGR 171457	T	0.74372	0.845088	0.941881		0.649434	0.831463	0.970629
418	ICGR 171458	T	0.824211	0.925552	1.02248		0.722259	0.887806	1.1411
419	ICGR 171459	T	0.928135	1.02943	1.12626		0.897271	1.04353	1.17983
420	ICGR 171460	T	0.634708	0.735712	0.832506		0.751991	0.705689	0.783807
421	ICGR 171461	T	0.706661	0.807753	0.904691		0.688088	0.747371	0.946723
422	ICGR 171462	T	0.920735	1.02218	1.11886		0.847821	1.1183	1.17968
423	ICGR 171464	T	1.07151	1.17267	1.26949		1.11802	1.19752	1.37338
424	ICGR 171465	T	1.05102	1.15258	1.24918		0.988319	1.27298	1.34955
425	ICGR 171466	T	0.535676	0.636862	0.733589		0.576304	0.63365	0.705299
426	ICGR 171467	T	0.989996	1.09115	1.188		1.03204	1.09108	1.29466
427	ICGR 171468	T	0.914842	1.01607	1.11279		0.916533	1.03082	1.101
428	ICGR 171469	T	1.0218	1.12298	1.21973		1.07358	1.13513	1.21984
429	ICGR 171470	T	0.701741	0.803013	0.89988		0.660571	0.776904	0.918624
430	ICGR 171471	T	0.678568	0.779791	0.876571		0.638656	0.709554	0.820607
431	ICGR 171472	T	0.824457	0.925492	1.022		0.888278	0.930869	0.935816
432	ICGR 171473	T	1.33065	1.43171	1.52872		1.39327	1.37802	1.65941
433	ICGR 171474	T	1.02347	1.12481	1.22152		0.996087	1.13655	1.21091
434	ICGR 171475	T	0.555814	0.657038	0.753857		0.523923	0.625276	0.773195
435	ICGR 171476	T	0.775304	0.876561	0.973188		0.760156	0.880547	0.940664
436	ICGR 171477	T	0.666454	0.767679	0.864617		0.6577	0.736547	0.865385
437	ICGR 171478	T	1.14543	1.24655	1.34328		1.2409	1.27574	1.34506
438	ICGR 171479	T	1.07742	1.17872	1.27549		1.07288	1.20218	1.34552
439	ICGR 171480	T	0.848687	0.950076	1.04675		0.786865	0.928692	1.01065
440	ICGR 171481	T	1.08793	1.18935	1.28615		1.04338	1.23323	1.37677
441	ICGR 171482	T	0.436826	0.538022	0.634817		0.424218	0.49559	0.638239
442	ICGR 171483	T	0.533153	0.634177	0.731035		0.624248	0.569507	0.701078
443	ICGR 171484	T	0.568236	0.669416	0.766207		0.571487	0.644446	0.777506
444	ICGR 171485	T	0.999175	1.10041	1.19716		1.00493	1.09644	1.21805
445	ICGR 171486	T	0.720263	0.821558	0.918265		0.708715	0.853492	0.942217
446	ICGR 171487	T	0.641541	0.742653	0.839472		0.66595	0.680532	0.82673
447	ICGR 171488	T	0.769633	0.871121	0.967491		0.766485	0.938304	0.871679
448	ICGR 171489	T	1.11459	1.21579	1.3127		1.09536	1.16421	1.41281
449	ICGR 171490	T	0.78019	0.881483	0.978214		0.745092	0.89412	1.01309
450	ICGR 171491	T	0.846267	0.947283	1.04387		0.912579	0.935354	0.951605
451	ICGR 171492	T	0.724526	0.825914	0.922546		0.658893	0.886028	0.900707
452	ICGR 171493	T	0.551452	0.652654	0.749511		0.49504	0.597556	0.755596
453	ICGR 171494	T	0.915683	1.01697	1.11363		0.955309	1.0773	1.09483
454	ICGR 171495	T	0.663449	0.764372	0.860934		0.726244	0.728773	0.685658
455	ICGR 171496	T	1.03265	1.13383	1.23054		1.10757	1.19343	1.27228
456	ICGR 171497	T	0.865791	0.967002	1.06368		0.869422	0.916432	0.994677
457	ICGR 171498	T	0.964569	1.0653	1.16209		1.06437	1.02425	1.09201
458	ICGR 171499	T	0.865983	0.967543	1.06391		0.851662	1.05575	0.989868
459	ICGR 171500	T	0.461837	0.562963	0.659701		0.50639	0.553005	0.63404
460	ICGR 171501	T	0.895929	0.997179	1.09398		0.890342	0.979826	1.12676
461	ICGR 171502	T	0.716886	0.818021	0.914947		0.718737	0.786388	0.936947
462	ICGR 171503	T	0.829315	0.930594	1.0274		0.849534	0.981187	1.12985
463	ICGR 171504	T	0.908381	1.00965	1.10648		0.837033	0.964911	1.10334
464	ICGR 171505	T	0.51942	0.620532	0.717401		0.497314	0.527037	0.701106
465	ICGR 171506	T	0.57452	0.67587	0.772519		0.482363	0.660644	0.686737
466	ICGR 171507	T	0.822321	0.923615	1.02043		0.745819	0.859062	1.08827
467	ICGR 171508	T	0.207733	0.308862	0.405602		0.224664	0.264198	0.334663
468	ICGR 171509	T	0.574974	0.67589	0.772775		0.662776	0.55007	0.792854
469	ICGR 171510	T	0.849403	0.950774	1.04743		0.808882	0.972098	1.02607
470	ICGR 171511	T	0.772925	0.874001	0.97069		0.829567	0.856101	0.897793
471	ICGR 171512	T	0.78541	0.886838	0.983663		0.664161	0.89356	1.08443
472	ICGR 171513	T	0.688382	0.789543	0.886181		0.704993	0.804691	0.883629
473	ICGR 171514	T	0.930983	1.03223	1.12904		0.92291	1.04331	1.20103
474	ICGR 171515	T	1.0939	1.1953	1.29194		1.08787	1.26139	1.34249
475	ICGR 171516	T	0.581768	0.682901	0.779572		0.592088	0.647141	0.697853
476	ICGR 171517	T	0.415468	0.51657	0.613358		0.436621	0.458248	0.541567
477	ICGR 171518	T	0.521353	0.622594	0.719327		0.536867	0.599012	0.613681
478	ICGR 171519	T	0.794383	0.895551	0.992227		0.817538	0.89931	0.943745
479	ICGR 171520	T	0.827163	0.928717	1.02517		0.756514	1.06325	0.928481
480	ICGR 171521	T	0.404018	0.505097	0.601746		0.485239	0.485183	0.442198
481	ICGR 171522	T	0.702647	0.803797	0.900909		0.58333	0.629875	0.985127
482	ICGR 171523	T	0.89784	0.99913	1.09574		0.902276	1.02539	0.998079
483	ICGR 171524	T	0.895	0.996136	1.09298		0.897639	0.970227	1.07275
484	ICGR 171525	T	0.807539	0.908726	1.00564		0.841456	0.871323	1.13566
485	ICGR 171526	T	0.951907	1.05318	1.14996		0.919756	1.08641	1.26873
486	ICGR 171527	T	0.739664	0.841057	0.937564		0.704326	0.906677	0.835404
487	ICGR 171528	T	0.722655	0.824013	0.920548		0.70701	0.881317	0.874866
488	ICGR 171529	T	0.743254	0.844347	0.940873		0.793203	0.841598	0.847262
489	ICGR 171530	T	0.681737	0.783444	0.88002		0.49547	0.897705	0.860457
490	ICGR 171531	T	0.686604	0.78782	0.884533		0.710122	0.810768	0.892492
491	ICGR 171532	T	0.950948	1.05197	1.14857		0.978497	1.01626	1.02771
492	ICGR 171533	T	0.964149	1.06533	1.16187		1.06698	1.13963	1.03919
493	ICGR 171534	T	0.848736	0.949968	1.04671		NA	NA	NA
494	ICGR 171535	T	0.951938	1.05305	1.14977		0.993554	0.992845	1.02956
495	ICGR 171536	T	0.630692	0.731863	0.828637		0.610294	0.678409	0.783046
496	ICGR 171537	T	1.13659	1.23757	1.33438		1.18593	1.12184	1.3357
497	ICGR 171538	T	0.633231	0.734416	0.831139		0.603005	0.700194	0.802755
498	ICGR 171539	T	0.575525	0.676564	0.773442		0.638268	0.608208	0.780061
499	ICGR 171540	T	0.687346	0.7883	0.885226		0.726221	0.73041	0.910667
500	ICGR 171542	T	0.870597	0.971689	1.06874		0.86369	0.8899	1.26364
501	ICGR 171543	T	0.739679	0.841095	0.937698		0.717951	0.881012	0.953629
502	ICGR 171544	T	0.918627	1.01961	1.11626		1.00311	0.939731	0.933558
503	ICGR 171545	T	0.792572	0.893867	0.99063		0.768271	0.910932	1.02108
504	ICGR 171546	T	0.41962	0.520738	0.617459		0.410018	0.468204	0.532651
505	ICGR 171547	T	0.915103	1.01627	1.11305		0.940652	0.972399	1.06475
506	ICGR 171549	T	0.82033	0.921624	1.01823		0.851211	0.988077	0.981679
507	ICGR 171550	T	1.25145	1.3526	1.44942		1.33543	1.39025	1.54386
508	ICGR 171552	T	0.618091	0.719297	0.816085		0.589676	0.674612	0.823055
509	ICGR 171553	T	0.724308	0.825579	0.922525		0.680701	0.78426	0.966351
510	ICGR 171554	T	0.545653	0.646736	0.743531		0.511942	0.521134	0.673069
511	ICGR 171555	T	1.02461	1.12584	1.22243		1.05458	1.14105	1.10355
512	ICGR 171557	T	0.919462	1.0207	1.11738		0.957691	1.0902	1.11437
513	ICGR 171558	T	0.6836	0.784627	0.881352		0.748037	0.744266	0.815167
514	ICGR 171559	T	0.733804	0.83478	0.931515		0.776987	0.801892	0.882051
515	ICGR 171560	T	1.11913	1.22042	1.31698		1.17436	1.30989	1.28056
516	ICGR 171561	T	0.651855	0.753058	0.849799		0.647779	0.743907	0.813921
517	ICGR 171562	T	0.754203	0.8554	0.952172		0.753727	0.86665	0.957329
518	ICGR 171563	T	0.897456	0.998728	1.09578		0.858376	0.964242	1.19522
519	ICGR 171564	T	0.921006	1.02218	1.11898		0.91308	0.98216	1.12797
520	ICGR 171565	T	0.823155	0.924487	1.02128		0.820506	0.929361	0.981537
521	ICGR 171567	T	0.767421	0.868758	0.96531		0.773409	0.883671	0.921715
522	ICGR 171568	T	1.20484	1.3061	1.40271		1.25842	1.36837	1.38384
523	ICGR 171569	T	0.836031	0.937213	1.03394		0.866304	0.921624	0.942294
524	ICGR 171570	T	0.555865	0.656991	0.753678		0.645993	0.609185	0.62154
525	ICGR 171571	T	0.860973	0.962317	1.05887		0.843963	0.982649	0.989603
526	ICGR 171572	T	0.971681	1.07264	1.16951		1.03492	1.05678	1.21479
527	ICGR 171573	T	0.242776	0.343937	0.440701		0.191356	0.268817	0.346715
528	ICGR 171574	T	0.94458	1.0458	1.14269		0.944912	1.065	1.30414
529	ICGR 171575	T	1.35827	1.45926	1.55633		1.40003	1.3477	1.74928
530	ICGR 171576	T	0.516332	0.617565	0.714314		0.469404	0.591998	0.67781
531	ICGR 171577	T	0.809634	0.910907	1.00745		0.784688	0.930359	0.888379
532	ICGR 171578	T	0.889249	0.990257	1.087		0.980476	0.994388	1.08655
533	ICGR 171579	T	0.970775	1.07197	1.16862		1.0063	1.10088	1.15122
534	ICGR 171580	T	0.868046	0.969468	1.06618		0.838315	1.00022	1.10477
535	ICGR 171581	T	0.910321	1.01158	1.10829		0.912295	1.04704	1.10765
536	ICGR 171582	T	1.02903	1.13022	1.22712		1.01562	1.11174	1.28722
537	ICGR 171583	T	0.978226	1.07944	1.17609		1.08	1.13735	1.16024
538	ICGR 171584	T	1.02982	1.1311	1.22784		1.06379	1.16536	1.29795
539	ICGR 171585	T	1.14371	1.24508	1.34191		1.08536	1.2646	1.44339
540	ICGR 171586	T	1.20022	1.30168	1.39832		1.16671	1.33463	1.39501
541	ICGR 171587	T	0.619229	0.720338	0.817017		0.715926	0.753571	0.787466
542	ICGR 171588	T	0.925889	1.02732	1.12395		0.879871	1.09773	1.12513
543	ICGR 171589	T	0.789779	0.891086	0.987803		0.762504	0.902317	0.972413
544	ICGR 171590	T	0.621183	0.722476	0.81922		0.562593	0.709169	0.806457
545	ICGR 171591	T	0.997591	1.09859	1.19534		1.04164	1.0642	1.14815
546	ICGR 171592	T	0.935498	1.037	1.13355		0.86504	1.14595	1.16867
547	ICGR 171593	T	0.94484	1.04594	1.14266		1.06048	1.0613	1.11121
548	ICGR 171594	T	0.603622	0.705014	0.801687		0.56821	0.687213	0.784995
549	ICGR 171595	T	0.661352	0.762637	0.859529		0.58106	0.71932	0.993239
550	ICGR 171596	T	1.06306	1.16433	1.26113		1.06715	1.19278	1.33552
551	ICGR 171597	T	0.945799	1.04701	1.14371		0.915114	1.0024	1.08065
552	ICGR 171598	T	0.647011	0.748037	0.844871		0.728701	0.686833	0.809006
553	ICGR 171599	T	0.359016	0.460118	0.556811		0.366973	0.404017	0.478893
554	ICGR 171600	T	1.11092	1.21277	1.30946		0.98373	1.28105	1.41081
555	ICGV 91114	P	0.733692	0.834891	0.931315		0.745519	0.823946	0.796188
556	ICGV6040	P	0.6076	0.708708	0.805483		0.606287	0.687566	0.799504
557	55-437	P	0.801539	0.902822	0.999393		0.794704	0.923497	0.889345
558	ICGV00440	P	0.481614	0.582706	0.679534		0.523035	0.520135	0.666863
559	ICGV00308	P	0.849845	0.951051	1.04787		0.861514	0.94262	1.11431
560	GPBD 4	P	0.620592	0.721572	0.818166		0.693555	0.690825	0.685889
561	ICGV5155	P	0.630054	0.731211	0.82803		0.582855	0.652191	0.83174
562	ICGV 88145	P	0.87945	0.98053	1.07717		0.895922	0.946284	0.959618
563	ICGV02266	C	0.641111	0.742445	0.83901		0.648536	0.775704	0.788877
564	ICGV03042	C	0.829984	0.931092	1.02781		0.87233	0.909212	0.941172
565	ICGV03043	C	0.650423	0.751402	0.847838		0.734104	0.773711	0.738132
566	ICGV6420	C	0.599802	0.701039	0.797687		0.568073	0.673525	0.70622
567	ICGV 14421	C	0.704938	0.806355	0.902866		0.704148	0.859102	0.858814
568	ICGV 86105	C	1.13756	1.23889	1.33562		1.07643	1.23405	1.36142
569	GG 20	C	0.957668	1.05898	1.1556		0.980624	1.11648	1.13232
570	JL 24	C	0.87918	0.980455	1.07719		0.904292	0.992558	1.1045
571	M 335	C	0.888519	0.990026	1.08675		0.865675	1.05964	1.16739
572	ICGS 76	C	0.821426	0.922728	1.01932		0.807987	1.00272	0.998205
573	ICGV 171174	C	0.641712	0.74298	0.839672		0.61427	0.75694	0.793098
574	TMV 2	C	1.05513	1.15644	1.25316		1.10666	1.24313	1.32741

## Sheet: Post-rainy 2022
Supplementary Table S2: BLUE and BLUP values for shell thickness in MAGIC population during post- rainy 2022-23
ENO	ENTRY	ETYPE	BLUP				BLUE
			predicted.value T1	predicted.value T2	predicted.value T3		predicted.value T1	predicted.value T2	predicted.value T3
1	ICGR 171002	T	0.768003	0.941383	1.00788		0.774095	0.962323	1.02799
2	ICGR 171003	T	0.818212	0.991666	1.0581		0.799163	1.03454	1.02999
3	ICGR 171004	T	0.610959	0.784383	0.850911		0.543794	0.747193	0.881751
4	ICGR 171005	T	0.519379	0.692738	0.759271		0.524808	0.707056	0.8016
5	ICGR 171008	T	0.699415	0.872748	0.939284		0.677008	0.734223	0.89116
6	ICGR 171009	T	0.82481	0.998256	1.06475		0.818874	1.06615	1.13994
7	ICGR 171010	T	0.552739	0.726205	0.792557		0.538533	0.817132	0.608845
8	ICGR 171011	T	0.742612	0.915991	0.982354		0.791145	0.968119	0.918786
9	ICGR 171012	T	0.954674	1.1281	1.19465		0.930494	1.21724	1.36452
10	ICGR 171013	T	0.880834	1.05421	1.12081		0.83844	1.0194	1.25755
11	ICGR 171014	T	0.641072	0.814176	0.880823		0.731666	0.651764	0.870095
12	ICGR 171015	T	0.588237	0.761507	0.828071		0.615401	0.657281	0.768058
13	ICGR 171016	T	0.723432	0.896688	0.963121		0.847608	0.901971	0.832074
14	ICGR 171017	T	1.02027	1.1939	1.26038		0.879989	1.25911	1.45114
15	ICGR 171018	T	0.758215	0.931737	0.998211		0.684984	0.973094	1.12712
16	ICGR 171020	T	0.598242	0.771654	0.837963		0.59021	0.804105	0.699285
17	ICGR 171021	T	0.899938	1.07319	1.13971		0.993172	1.0465	1.1294
18	ICGR 171022	T	0.876434	1.04982	1.11642		0.872479	1.02309	1.19726
19	ICGR 171023	T	0.989285	1.16265	1.22901		1.00355	1.1598	1.1197
20	ICGR 171024	T	0.966042	1.13946	1.20596		0.973562	1.14484	1.23141
21	ICGR 171025	T	0.805322	0.978686	1.04522		0.809746	0.967938	1.13187
22	ICGR 171026	T	0.861765	1.03533	1.10171		0.807508	1.20445	1.1223
23	ICGR 171027	T	0.913699	1.0871	1.15364		0.92021	1.10137	1.28864
24	ICGR 171028	T	0.680503	0.853876	0.920488		0.638801	0.788885	1.0228
25	ICGR 171029	T	0.815569	0.989109	1.05571		0.708065	1.02518	1.30069
26	ICGR 171030	T	0.872461	1.04565	1.11234		0.900936	1.00476	1.22552
27	ICGR 171031	T	0.642476	0.815861	0.882385		0.620878	0.847021	0.934332
28	ICGR 171032	T	0.940192	1.11361	1.18007		0.948765	1.1019	1.19589
29	ICGR 171033	T	1.05326	1.22685	1.29331		1.00045	1.3963	1.49008
30	ICGR 171034	T	0.913859	1.08725	1.15375		0.922061	1.08145	1.21187
31	ICGR 171035	T	0.904688	1.07827	1.14471		0.879761	1.12697	1.20786
32	ICGR 171036	T	0.778491	0.951721	1.01824		0.803333	0.864443	0.973522
33	ICGR 171037	T	0.854617	1.02817	1.09453		0.842773	1.10151	1.0724
34	ICGR 171038	T	0.456248	0.629423	0.696019		0.504585	0.447599	0.580811
35	ICGR 171039	T	0.7401	0.913371	0.979955		0.752292	0.819047	1.02358
36	ICGR 171040	T	0.86708	1.04091	1.10708		0.711572	1.32972	1.01611
37	ICGR 171041	T	0.902972	1.0763	1.14278		0.978619	1.10516	1.17845
38	ICGR 171042	T	0.782886	0.95617	1.02271		0.859696	0.993502	1.08936
39	ICGR 171043	T	0.810777	0.984084	1.0507		0.878612	0.984886	1.23645
40	ICGR 171044	T	0.489254	0.662584	0.729159		0.446801	0.572756	0.700067
41	ICGR 171045	T	0.734119	0.907454	0.973975		0.753993	0.866582	0.962053
42	ICGR 171046	T	1.12072	1.29408	1.36061		1.17162	1.33481	1.54539
43	ICGR 171049	T	0.992892	1.16626	1.23236		1.15189	1.37085	0.788571
44	ICGR 171050	T	0.667974	0.841269	0.907996		0.640597	0.769815	1.01836
45	ICGR 171051	T	0.762139	0.935344	1.00204		0.783987	0.778349	1.13425
46	ICGR 171052	T	0.464707	0.637867	0.704615		0.482575	0.506861	0.850183
47	ICGR 171053	T	0.758991	0.932418	0.998995		0.695146	0.8507	1.09935
48	ICGR 171054	T	0.96122	1.13468	1.20132		0.927262	1.10003	1.35992
49	ICGR 171055	T	0.957063	1.13035	1.19687		1.04082	1.12073	1.2248
50	ICGR 171056	T	0.762366	0.935745	1.00224		NA	NA	NA
51	ICGR 171057	T	0.783323	0.956711	1.02324		0.799661	0.958604	1.06123
52	ICGR 171058	T	0.463574	0.636877	0.703463		0.430581	0.466314	0.677972
53	ICGR 171059	T	0.920433	1.09409	1.16042		0.891754	1.18535	1.15695
54	ICGR 171060	T	0.758315	0.931642	0.998305		0.739143	0.89312	1.06721
55	ICGR 171061	T	0.398638	0.571939	0.638366		0.397973	0.519001	0.488695
56	ICGR 171062	T	0.740871	0.914321	0.980745		0.71782	0.940184	0.923739
57	ICGR 171063	T	0.629415	0.803172	0.869574		0.515154	0.850552	0.894155
58	ICGR 171064	T	0.677975	0.851268	0.917829		0.710809	0.74941	0.870234
59	ICGR 171065	T	0.712522	0.885976	0.952289		0.697217	1.01905	0.724265
60	ICGR 171066	T	0.796374	0.969627	1.03633		0.844231	0.917425	1.26734
61	ICGR 171067	T	0.867066	1.04101	1.1072		0.763713	1.19639	1.09859
62	ICGR 171068	T	0.799946	0.97334	1.03959		0.871375	1.09577	0.748517
63	ICGR 171070	T	0.791894	0.965364	1.03181		0.768946	0.964161	1.03511
64	ICGR 171071	T	0.871486	1.04497	1.11159		0.815667	1.0159	1.22015
65	ICGR 171072	T	0.756292	0.93019	0.996379		0.644292	1.04798	0.947803
66	ICGR 171073	T	0.4413	0.614643	0.681052		0.436193	0.574253	0.458224
67	ICGR 171074	T	0.73783	0.91112	0.977781		0.752641	0.895038	1.05599
68	ICGR 171075	T	0.684918	0.858247	0.924809		0.688333	0.799401	0.974079
69	ICGR 171076	T	0.432098	0.605191	0.671755		0.522209	0.441784	0.469536
70	ICGR 171077	T	0.897815	1.07124	1.13781		0.857099	1.03274	1.27575
71	ICGR 171079	T	0.497898	0.671484	0.737843		0.398282	0.767563	0.648876
72	ICGR 171080	T	0.696444	0.870237	0.936725		0.586949	0.963599	1.07364
73	ICGR 171081	T	0.920932	1.09438	1.16087		0.931509	1.14142	1.26118
74	ICGR 171082	T	0.800635	0.973925	1.04039		0.901856	1.02964	0.971807
75	ICGR 171083	T	0.706743	0.880115	0.94653		0.683842	0.862246	0.738813
76	ICGR 171084	T	0.784664	0.958129	1.02503		0.659242	0.902169	1.67601
77	ICGR 171085	T	0.729546	0.902888	0.969428		0.773655	0.949824	1.06423
78	ICGR 171086	T	0.810593	0.98407	1.05058		0.757043	1.00291	1.14737
79	ICGR 171087	T	0.952346	1.12589	1.19236		0.866073	1.27473	1.36872
80	ICGR 171088	T	0.908724	1.08211	1.14862		0.923683	1.11344	1.19034
81	ICGR 171089	T	0.645876	0.819162	0.885882		0.645675	0.737143	1.08794
82	ICGR 171093	T	0.703762	0.877139	0.943641		0.721855	0.871412	0.942649
83	ICGR 171094	T	0.759521	0.933203	0.99946		0.641158	1.0856	0.836281
84	ICGR 171095	T	1.0043	1.1777	1.24424		1.00388	1.26027	1.42502
85	ICGR 171096	T	0.805937	0.979197	1.04559		0.929179	1.01649	0.848967
86	ICGR 171098	T	0.866057	1.0394	1.10596		0.908963	1.07877	1.23384
87	ICGR 171099	T	0.710108	0.883347	0.949973		0.75006	0.85257	1.08672
88	ICGR 171100	T	0.883901	1.05733	1.12389		0.899397	1.10532	1.24337
89	ICGR 171101	T	0.974871	1.14803	1.21476		0.995187	1.08878	1.30229
90	ICGR 171102	T	0.84104	1.01433	1.08082		0.887615	1.01779	1.02373
91	ICGR 171103	T	0.549241	0.72281	0.789159		0.441821	0.72837	0.606983
92	ICGR 171104	T	0.800752	0.974084	1.04053		0.826967	0.958715	0.959099
93	ICGR 171105	T	0.715748	0.889095	0.955713		0.684036	0.816447	1.05358
94	ICGR 171106	T	0.895758	1.06915	1.1357		0.898889	1.09153	1.20765
95	ICGR 171107	T	0.862579	1.03582	1.10232		1.0256	1.10267	1.10148
96	ICGR 171108	T	0.719532	0.892815	0.959315		0.750127	0.888642	0.86911
97	ICGR 171109	T	0.708485	0.882001	0.94874		0.644441	0.837454	1.11324
98	ICGR 171110	T	0.524167	0.69739	0.764099		0.512666	0.502581	0.860382
99	ICGR 171112	T	0.660239	0.833514	0.900023		0.731031	0.835389	0.894039
100	ICGR 171113	T	0.953457	1.1268	1.19332		0.974964	1.11478	1.23387
101	ICGR 171116	T	0.708862	0.88213	0.948757		0.72873	0.829366	0.977731
102	ICGR 171117	T	0.762366	0.935745	1.00224		NA	NA	NA
103	ICGR 171118	T	0.890358	1.06375	1.13032		0.870421	1.0256	1.26535
104	ICGR 171119	T	0.719152	0.892552	0.959071		0.709521	0.876878	1.02764
105	ICGR 171120	T	0.85008	1.02333	1.08985		0.909076	0.981708	1.11044
106	ICGR 171121	T	0.93959	1.11314	1.17958		0.876711	1.22135	1.28935
107	ICGR 171122	T	0.814539	0.987905	1.0545		0.806822	0.963903	1.18385
108	ICGR 171123	T	0.713124	0.886415	0.952946		0.790646	0.882527	0.99344
109	ICGR 171124	T	0.999179	1.17243	1.23898		1.084	1.11531	1.25843
110	ICGR 171126	T	0.936261	1.10959	1.17617		0.97293	1.09277	1.32849
111	ICGR 171127	T	0.777276	0.950789	1.01723		0.710699	0.965255	1.02682
112	ICGR 171128	T	0.750798	0.92421	0.990707		0.735853	0.928226	0.976761
113	ICGR 171129	T	0.522114	0.695623	0.762089		0.402824	0.682466	0.70342
114	ICGR 171131	T	1.00468	1.17798	1.24443		1.07878	1.23728	1.21919
115	ICGR 171132	T	0.709046	0.882442	0.948823		0.73508	0.952409	0.835508
116	ICGR 171133	T	0.597335	0.770579	0.837088		0.66169	0.690565	0.707877
117	ICGR 171134	T	0.73847	0.911854	0.978393		0.714326	0.862505	1.03225
118	ICGR 171135	T	0.620626	0.793912	0.860468		0.612569	0.753666	0.841097
119	ICGR 171136	T	0.822076	0.995386	1.06195		0.887441	0.974602	1.17367
120	ICGR 171137	T	0.654718	0.828054	0.894671		0.689691	0.851329	1.00259
121	ICGR 171138	T	0.822713	0.996248	1.06271		0.799731	1.00726	1.10636
122	ICGR 171139	T	0.652199	0.825852	0.892237		0.51542	0.953422	0.926893
123	ICGR 171140	T	0.704984	0.878262	0.944933		0.731925	0.820135	1.11813
124	ICGR 171141	T	0.747629	0.920858	0.987595		0.75797	0.833628	1.1015
125	ICGR 171142	T	0.779862	0.953155	1.01959		0.847532	0.937588	0.845382
126	ICGR 171143	T	0.778305	0.951647	1.0183		0.739362	0.858942	1.18771
127	ICGR 171144	T	0.639912	0.812857	0.879521		0.744961	0.74209	0.852478
128	ICGR 171145	T	0.702898	0.876243	0.942836		0.659315	0.83502	1.02923
129	ICGR 171146	T	0.710421	0.883766	0.9503		0.701404	0.858601	0.95549
130	ICGR 171147	T	0.661168	0.834372	0.900784		0.800004	0.809712	0.659368
131	ICGR 171148	T	0.856313	1.02973	1.09612		0.841067	1.06659	0.98795
132	ICGR 171149	T	0.775617	0.949099	1.01557		0.739735	1.01869	1.07275
133	ICGR 171150	T	0.540968	0.714265	0.780833		0.552373	0.637416	0.768622
134	ICGR 171151	T	1.14335	1.31675	1.38331		1.13901	1.35598	1.48224
135	ICGR 171152	T	1.30581	1.47937	1.54577		1.28337	1.62726	1.66715
136	ICGR 171153	T	0.720692	0.893981	0.960569		0.732555	0.805868	0.936645
137	ICGR 171154	T	0.955982	1.12928	1.19589		0.977453	1.07025	1.30257
138	ICGR 171155	T	0.697138	0.870801	0.937271		0.542953	0.967671	1.09736
139	ICGR 171156	T	0.812967	0.986326	1.05284		0.824996	1.01622	1.10284
140	ICGR 171157	T	0.64426	0.817538	0.88401		0.685123	0.774604	0.713183
141	ICGR 171158	T	0.839229	1.0127	1.07921		0.787066	1.01088	1.13891
142	ICGR 171159	T	0.728241	0.901569	0.968122		0.707776	0.834735	0.9521
143	ICGR 171160	T	0.668207	0.841761	0.907895		0.687401	0.956074	0.745502
144	ICGR 171161	T	0.509358	0.682617	0.749168		0.528602	0.605817	0.700388
145	ICGR 171162	T	0.743847	0.917099	0.983677		0.785758	0.846166	0.981113
146	ICGR 171163	T	0.454724	0.628124	0.694523		0.451494	0.639044	0.520216
147	ICGR 171164	T	0.62577	0.799124	0.865689		0.572997	0.684604	0.849188
148	ICGR 171165	T	0.685359	0.858715	0.925327		0.639306	0.799506	1.04209
149	ICGR 171166	T	0.674953	0.848305	0.914751		0.697946	0.880805	0.815817
150	ICGR 171167	T	0.831872	1.00498	1.07158		0.878972	0.896302	1.03982
151	ICGR 171168	T	0.645339	0.818617	0.885139		0.693112	0.793832	0.825399
152	ICGR 171169	T	0.470386	0.64392	0.710373		0.338632	0.635207	0.626734
153	ICGR 171170	T	0.569641	0.742968	0.809544		0.543739	0.606099	0.81085
154	ICGR 171171	T	0.7508	0.923967	0.990522		0.771184	0.860905	0.923828
155	ICGR 171172	T	0.651502	0.825071	0.891511		0.557038	0.912026	0.892254
156	ICGR 171173	T	0.994612	1.16828	1.23442		0.965454	1.39771	0.96582
157	ICGR 171174	T	0.70282	0.876193	0.942748		0.692292	0.854152	0.995211
158	ICGR 171175	T	0.733511	0.906706	0.973167		0.769725	0.855223	0.853977
159	ICGR 171176	T	0.623353	0.796751	0.863258		0.578852	0.78775	0.838117
160	ICGR 171177	T	0.632406	0.806066	0.872281		0.593806	1.04341	0.713693
161	ICGR 171178	T	0.784755	0.958075	1.02459		0.848816	0.959379	1.04377
162	ICGR 171179	T	0.753429	0.92675	0.993415		0.738385	0.880213	1.06472
163	ICGR 171180	T	0.789347	0.962399	1.02899		0.855887	0.902068	0.973339
164	ICGR 171181	T	0.520217	0.693576	0.760097		0.479213	0.596479	0.690645
165	ICGR 171182	T	0.84883	1.02226	1.08876		0.842673	1.02364	1.14981
166	ICGR 171183	T	0.506488	0.679817	0.746495		0.510703	0.611803	0.864138
167	ICGR 171184	T	1.13435	1.30769	1.37407		1.27157	1.40979	1.31084
168	ICGR 171185	T	0.709544	0.883062	0.94933		0.669479	1.00006	0.747455
169	ICGR 171186	T	0.688584	0.861956	0.928393		0.691675	0.833684	0.849431
170	ICGR 171187	T	0.621315	0.79496	0.861261		0.548523	0.8894	0.818478
171	ICGR 171188	T	0.731767	0.905177	0.971707		0.690011	0.896512	1.01482
172	ICGR 171189	T	0.646245	0.819612	0.886142		0.642191	0.82072	0.924481
173	ICGR 171190	T	0.939138	1.11255	1.17908		0.928582	1.07784	1.24093
174	ICGR 171191	T	0.674812	0.848323	0.914857		0.598925	0.877553	1.047
175	ICGR 171192	T	0.80951	0.98303	1.0494		0.767787	1.09142	0.96272
176	ICGR 171193	T	0.709689	0.882852	0.949237		0.777507	0.854006	0.802843
177	ICGR 171194	T	0.69938	0.872998	0.939523		0.56159	0.965036	1.14786
178	ICGR 171196	T	0.671356	0.844645	0.911188		0.69183	0.782722	0.92125
179	ICGR 171197	T	0.635502	0.808775	0.875478		0.648664	0.708839	1.07012
180	ICGR 171198	T	0.750138	0.923352	0.989938		0.807672	0.7936	0.934308
181	ICGR 171199	T	1.02573	1.19917	1.26566		1.00682	1.17954	1.30643
182	ICGR 171200	T	0.702352	0.875581	0.941807		0.783015	0.890979	0.675159
183	ICGR 171201	T	0.802261	0.976132	1.04232		0.641017	1.29065	0.994319
184	ICGR 171202	T	0.656271	0.829685	0.896333		0.581249	0.755872	1.16499
185	ICGR 171203	T	0.712412	0.885696	0.952255		0.768367	0.832886	0.952348
186	ICGR 171205	T	0.607504	0.780827	0.847324		0.625616	0.687113	0.769598
187	ICGR 171206	T	0.657575	0.830831	0.897505		0.659753	0.770481	0.925822
188	ICGR 171207	T	0.720174	0.893514	0.960047		0.711765	0.823285	0.934079
189	ICGR 171208	T	0.633359	0.806808	0.873268		0.561909	0.845446	0.812465
190	ICGR 171209	T	0.689906	0.863265	0.929728		0.690775	0.799054	0.805229
191	ICGR 171210	T	0.960359	1.13395	1.20052		0.860826	1.16116	1.46867
192	ICGR 171211	T	0.762366	0.935745	1.00224		NA	NA	NA
193	ICGR 171212	T	0.671381	0.844958	0.911346		0.606978	0.921717	0.901093
194	ICGR 171214	T	0.745683	0.919334	0.98564		0.682699	1.12079	0.95753
195	ICGR 171215	T	0.601621	0.775265	0.84164		0.514476	0.751328	0.809244
196	ICGR 171216	T	1.04135	1.21494	1.28143		0.940703	1.34472	1.49699
197	ICGR 171217	T	0.702465	0.875764	0.942034		0.748818	0.921447	0.753092
198	ICGR 171218	T	0.834046	1.00739	1.07374		0.895553	1.07177	0.857632
199	ICGR 171220	T	0.759544	0.933252	0.999544		0.666946	1.03915	0.987521
200	ICGR 171222	T	0.877944	1.05113	1.11783		0.96483	1.00101	1.312
201	ICGR 171223	T	1.00198	1.1754	1.24185		1.01215	1.19947	1.24496
202	ICGR 171224	T	0.762366	0.935745	1.00224		NA	NA	NA
203	ICGR 171225	T	0.80413	0.977488	1.04392		0.806247	1.0148	0.939339
204	ICGR 171226	T	0.721577	0.894918	0.961359		0.828559	0.989792	0.927646
205	ICGR 171227	T	0.738107	0.911489	0.977973		0.745305	0.902344	0.959703
206	ICGR 171228	T	0.771801	0.945073	1.01166		0.808961	0.91113	1.02701
207	ICGR 171229	T	0.841652	1.01522	1.08175		0.804163	1.05144	1.19314
208	ICGR 171230	T	0.478697	0.652123	0.718729		0.411479	0.623341	0.770702
209	ICGR 171231	T	0.847942	1.02119	1.08778		0.924425	0.972472	1.19215
210	ICGR 171232	T	0.724783	0.897667	0.964479		0.826095	0.767487	1.02667
211	ICGR 171233	T	0.713722	0.886994	0.953494		0.758923	0.802515	0.904872
212	ICGR 171235	T	0.829604	1.00297	1.06944		0.894815	1.01482	1.0904
213	ICGR 171236	T	0.795709	0.969057	1.0356		0.806246	0.971123	1.10818
214	ICGR 171237	T	0.677043	0.850282	0.916892		0.679289	0.642111	0.903314
215	ICGR 171238	T	0.899118	1.07231	1.13865		1.03581	1.01634	0.799778
216	ICGR 171239	T	0.748967	0.92224	0.988773		0.784355	0.82372	0.967133
217	ICGR 171240	T	0.91266	1.08611	1.15265		0.881991	1.13634	1.31304
218	ICGR 171241	T	0.501813	0.675415	0.74178		0.399844	0.786959	0.760092
219	ICGR 171242	T	0.693209	0.866619	0.933118		0.65073	0.902799	0.923355
220	ICGR 171243	T	0.820345	0.993903	1.06052		0.661162	0.944901	1.2958
221	ICGR 171244	T	0.78203	0.955272	1.02181		0.873564	0.906092	0.986977
222	ICGR 171245	T	0.782479	0.955731	1.02234		0.843997	0.926883	1.18477
223	ICGR 171246	T	0.793113	0.966388	1.03278		0.843723	0.969616	0.92516
224	ICGR 171247	T	0.762366	0.935745	1.00224		NA	NA	NA
225	ICGR 171248	T	0.791225	0.964653	1.03115		0.758347	0.977693	1.08876
226	ICGR 171249	T	0.64491	0.818539	0.884959		0.592205	0.853532	0.893467
227	ICGR 171250	T	0.719168	0.892643	0.959085		0.684682	0.914511	0.937716
228	ICGR 171251	T	0.724294	0.89777	0.96431		0.634325	0.927807	1.05296
229	ICGR 171252	T	0.777041	0.950374	1.01689		0.792512	0.892467	1.01873
230	ICGR 171253	T	0.817412	0.990789	1.05712		0.889836	1.08614	0.844446
231	ICGR 171254	T	0.948094	1.12184	1.18818		0.78415	1.33039	1.27333
232	ICGR 171255	T	0.984686	1.15797	1.22442		1.07393	1.19111	1.19764
233	ICGR 171256	T	0.795848	0.969369	1.0359		0.729375	0.962248	1.09763
234	ICGR 171257	T	0.781907	0.955193	1.02177		0.801958	0.967206	1.11235
235	ICGR 171258	T	0.634792	0.808527	0.874839		0.475039	0.919053	0.778199
236	ICGR 171259	T	0.557533	0.731055	0.79749		0.511308	0.750148	0.752061
237	ICGR 171260	T	0.625976	0.799032	0.865575		0.768854	0.613312	0.60545
238	ICGR 171261	T	0.655637	0.829154	0.895462		0.655816	0.950409	0.712099
239	ICGR 171262	T	0.544058	0.717482	0.783872		0.495606	0.72569	0.580697
240	ICGR 171263	T	0.575769	0.749188	0.81562		0.571358	0.790055	0.753886
241	ICGR 171264	T	0.839075	1.01249	1.07907		0.834323	0.999912	1.3009
242	ICGR 171265	T	0.58258	0.755896	0.822452		0.587707	0.670445	0.807287
243	ICGR 171266	T	0.9811	1.15467	1.22111		0.893175	1.25646	1.28288
244	ICGR 171267	T	1.01603	1.18935	1.25578		1.07201	1.24479	1.17712
245	ICGR 171268	T	1.03678	1.21004	1.27662		1.13302	1.1499	1.34473
246	ICGR 171269	T	0.6634	0.836948	0.903553		0.604254	0.824608	1.01674
247	ICGR 171270	T	0.723356	0.896753	0.963253		0.694138	0.862318	0.946191
248	ICGR 171271	T	0.620917	0.794264	0.860741		0.637651	0.765267	0.782538
249	ICGR 171272	T	0.82304	0.99642	1.06302		0.837637	1.01662	1.17289
250	ICGR 171273	T	0.660071	0.833486	0.899847		0.653748	0.868998	0.80821
251	ICGR 171274	T	0.783649	0.957067	1.02332		0.847421	1.0542	0.728239
252	ICGR 171275	T	0.773933	0.946984	1.01343		0.972781	0.86836	0.707971
253	ICGR 171276	T	0.586876	0.760151	0.826641		0.620289	0.697334	0.676515
254	ICGR 171277	T	0.706238	0.879588	0.946124		0.681477	0.833612	0.942801
255	ICGR 171278	T	0.825664	0.999099	1.06561		0.823346	1.10384	1.18933
256	ICGR 171279	T	1.01259	1.18564	1.25194		1.13996	1.17326	1.02359
257	ICGR 171280	T	0.737532	0.910652	0.977167		0.85164	0.75989	0.757613
258	ICGR 171281	T	1.0571	1.23044	1.29669		1.19002	1.3818	1.06189
259	ICGR 171282	T	0.768751	0.942127	1.00856		0.764607	0.937309	0.923104
260	ICGR 171283	T	0.677827	0.851419	0.917811		0.580478	0.942934	0.8641
261	ICGR 171284	T	0.824478	0.997785	1.06438		0.823395	0.965138	1.14001
262	ICGR 171285	T	0.572196	0.745671	0.812141		0.501696	0.698727	0.746819
263	ICGR 171286	T	0.739351	0.912629	0.978994		0.846202	0.937438	0.724828
264	ICGR 171288	T	0.771409	0.944624	1.01119		0.832325	0.897028	1.03003
265	ICGR 171289	T	0.520582	0.693831	0.760371		0.565644	0.562824	0.658588
266	ICGR 171290	T	0.751751	0.925198	0.991658		0.7442	1.0258	1.0134
267	ICGR 171291	T	0.772038	0.94536	1.01199		0.762006	0.890742	1.12399
268	ICGR 171292	T	0.755938	0.929057	0.995805		0.800629	0.738035	1.14422
269	ICGR 171293	T	0.819984	0.993489	1.05994		0.780475	1.0455	1.13345
270	ICGR 171295	T	0.541352	0.714505	0.781046		0.592949	0.570551	0.672638
271	ICGR 171296	T	0.689902	0.863154	0.929745		0.750566	0.841817	0.98471
272	ICGR 171297	T	0.711514	0.884787	0.951346		0.745393	0.842368	0.86508
273	ICGR 171298	T	1.11464	1.28773	1.35424		1.22731	1.27959	1.3262
274	ICGR 171299	T	0.909536	1.0829	1.14941		0.938783	1.07017	1.18134
275	ICGR 171300	T	0.759405	0.932785	0.999349		0.728545	0.910124	1.10197
276	ICGR 171301	T	0.578229	0.751524	0.817986		0.606381	0.715364	0.780191
277	ICGR 171302	T	0.669085	0.842342	0.908962		0.684364	0.708326	0.931426
278	ICGR 171303	T	1.04328	1.21673	1.28327		1.02232	1.26206	1.44988
279	ICGR 171304	T	0.497454	0.670691	0.73715		0.545163	0.600853	0.526187
280	ICGR 171305	T	0.653395	0.82702	0.893339		0.557051	0.929633	0.751806
281	ICGR 171306	T	0.596934	0.770453	0.836999		0.463965	0.799964	0.949009
282	ICGR 171307	T	0.581139	0.754576	0.821069		0.552249	0.781943	0.862507
283	ICGR 171308	T	0.810188	0.983992	1.05024		0.663769	1.26278	1.06383
284	ICGR 171311	T	0.713381	0.887157	0.953406		0.526668	1.06714	0.834534
285	ICGR 171312	T	0.887082	1.06021	1.12696		0.958378	0.826334	1.31071
286	ICGR 171313	T	0.759752	0.933013	0.999631		0.826138	0.876042	1.14513
287	ICGR 171314	T	0.786831	0.960096	1.02651		0.877559	0.94183	0.860769
288	ICGR 171315	T	0.734728	0.908216	0.974867		0.627462	0.863799	1.25356
289	ICGR 171316	T	0.762366	0.935745	1.00224		NA	NA	NA
290	ICGR 171317	T	0.698928	0.872316	0.938696		0.750398	0.93346	0.791688
291	ICGR 171318	T	0.82853	1.00173	1.06837		0.861838	0.889587	1.15652
292	ICGR 171320	T	0.760193	0.933584	1.00006		0.747286	0.908009	0.978182
293	ICGR 171321	T	0.714883	0.887989	0.954646		0.87735	0.775503	1.03272
294	ICGR 171322	T	0.796199	0.9697	1.03618		0.748227	0.965931	1.05053
295	ICGR 171323	T	0.895935	1.06902	1.13542		0.998926	1.07203	1.01716
296	ICGR 171324	T	0.678129	0.851137	0.917781		0.737236	0.746576	0.864803
297	ICGR 171325	T	0.566714	0.739977	0.806542		0.594755	0.704455	0.798473
298	ICGR 171326	T	0.802026	0.975439	1.04176		0.84385	1.04955	0.845089
299	ICGR 171327	T	0.697006	0.870459	0.936957		0.663131	0.921641	1.01129
300	ICGR 171328	T	0.887473	1.06085	1.1274		0.914776	1.04846	1.25845
301	ICGR 171329	T	0.69341	0.866758	0.933375		0.696255	0.84471	1.01773
302	ICGR 171330	T	0.640425	0.813454	0.880029		0.722811	0.768535	0.826438
303	ICGR 171331	T	0.750441	0.923752	0.990119		0.794941	0.909068	0.709653
304	ICGR 171332	T	0.677922	0.851201	0.917825		0.691474	0.765893	1.00253
305	ICGR 171334	T	0.479446	0.652876	0.719303		0.439345	0.612267	0.549319
306	ICGR 171335	T	0.538711	0.712021	0.778385		0.583699	0.711618	0.451294
307	ICGR 171336	T	0.752121	0.92526	0.99174		0.811134	0.873901	0.9014
308	ICGR 171337	T	0.624406	0.797818	0.864303		0.590184	0.754689	0.828632
309	ICGR 171338	T	0.819338	0.992654	1.05923		0.859308	0.985201	1.15982
310	ICGR 171339	T	0.58822	0.761519	0.827887		0.640611	0.747533	0.581157
311	ICGR 171340	T	0.739413	0.912722	0.979248		0.754309	0.799329	0.928056
312	ICGR 171341	T	1.08357	1.25693	1.3235		1.12293	1.29306	1.46303
313	ICGR 171343	T	1.0601	1.23356	1.29977		1.13772	1.44416	1.04251
314	ICGR 171345	T	0.706955	0.880437	0.946997		0.611473	0.902424	1.08519
315	ICGR 171347	T	1.05574	1.22919	1.29578		1.07213	1.30703	1.60792
316	ICGR 171348	T	0.631152	0.804488	0.871014		0.603523	0.721256	0.795638
317	ICGR 171349	T	0.858068	1.03143	1.09808		0.828425	1.05073	1.27717
318	ICGR 171350	T	0.756278	0.929659	0.996186		0.724362	0.907317	0.966883
319	ICGR 171351	T	0.655066	0.828387	0.894861		0.67973	0.852795	0.873444
320	ICGR 171352	T	0.563192	0.736426	0.80294		0.60218	0.666871	0.678712
321	ICGR 171353	T	0.838389	1.01182	1.07819		0.807388	1.0496	0.920155
322	ICGR 171354	T	0.626823	0.800093	0.866683		0.6352	0.754811	0.880867
323	ICGR 171355	T	0.709268	0.882727	0.949226		0.633186	0.8583	0.96311
324	ICGR 171356	T	0.655422	0.828784	0.895426		0.577033	0.793117	1.04346
325	ICGR 171358	T	0.623696	0.797003	0.863412		0.665022	0.823706	0.737078
326	ICGR 171360	T	0.870537	1.04368	1.1103		0.99437	0.900113	1.12797
327	ICGR 171361	T	0.963846	1.13725	1.20381		0.954279	1.21025	1.3788
328	ICGR 171362	T	0.965807	1.13916	1.20572		0.991213	1.14541	1.2964
329	ICGR 171363	T	0.730833	0.904236	0.970826		0.672934	0.907099	1.10159
330	ICGR 171364	T	1.1387	1.31234	1.37884		1.01485	1.49282	1.71177
331	ICGR 171365	T	0.569472	0.742958	0.809375		0.462098	0.716246	0.678208
332	ICGR 171366	T	0.801397	0.974739	1.04138		0.80893	0.968515	1.2569
333	ICGR 171367	T	0.768289	0.941673	1.00812		0.763967	0.936267	0.904021
334	ICGR 171368	T	0.733466	0.906739	0.973278		0.770835	0.890059	0.956751
335	ICGR 171369	T	0.90704	1.08023	1.14692		0.983886	0.995562	1.35322
336	ICGR 171370	T	0.484334	0.657592	0.724037		0.507386	0.581766	0.490932
337	ICGR 171371	T	1.0743	1.24792	1.3139		1.12134	1.56613	0.833651
338	ICGR 171372	T	0.756658	0.929942	0.996459		0.794115	0.856348	0.904642
339	ICGR 171373	T	0.894081	1.06742	1.13382		0.952601	1.13667	1.07225
340	ICGR 171374	T	0.835433	1.00873	1.07522		0.881526	0.94526	0.99585
341	ICGR 171375	T	0.997161	1.17044	1.23703		1.07161	1.14593	1.39276
342	ICGR 171376	T	0.974507	1.148	1.21452		0.929122	1.22603	1.46301
343	ICGR 171377	T	0.571014	0.744478	0.810752		0.555933	0.777323	0.648218
344	ICGR 171378	T	0.99573	1.16919	1.23581		0.932702	1.19992	1.54466
345	ICGR 171379	T	0.329296	0.502504	0.56905		0.322807	0.286129	0.370266
346	ICGR 171380	T	0.716918	0.8904	0.956938		0.692509	0.938224	1.03895
347	ICGR 171381	T	0.653054	0.82614	0.892803		0.696563	0.743994	0.885228
348	ICGR 171382	T	1.07549	1.24879	1.31483		1.15637	1.30434	1.00447
349	ICGR 171383	T	0.697097	0.870043	0.936768		0.878374	0.6194	0.943267
350	ICGR 171384	T	0.684419	0.857707	0.924366		0.648418	0.757465	1.0284
351	ICGR 171385	T	1.01829	1.19176	1.25819		1.04103	1.26499	1.33114
352	ICGR 171386	T	0.707899	0.881397	0.947872		0.617993	0.872634	0.954837
353	ICGR 171387	T	1.13946	1.31293	1.37918		1.19623	1.51973	1.24235
354	ICGR 171388	T	0.776791	0.950056	1.0167		0.801615	0.926951	1.06759
355	ICGR 171389	T	0.635432	0.808884	0.875191		0.630925	0.925705	0.609631
356	ICGR 171390	T	0.837648	1.01084	1.07734		0.885274	0.979158	1.01857
357	ICGR 171391	T	0.682296	0.85566	0.921926		0.710298	0.900462	0.762508
358	ICGR 171392	T	0.93416	1.10757	1.17406		0.959235	1.14755	1.23031
359	ICGR 171393	T	0.894209	1.06745	1.13401		0.981191	0.998701	1.1418
360	ICGR 171394	T	0.671767	0.845156	0.911909		0.625436	0.79518	1.09832
361	ICGR 171395	T	0.784913	0.958368	1.02482		0.753537	1.00055	1.02148
362	ICGR 171396	T	0.848	1.02151	1.08802		0.77531	0.999159	1.23912
363	ICGR 171397	T	0.762366	0.935745	1.00224		NA	NA	NA
364	ICGR 171398	T	0.888592	1.06199	1.1285		0.86808	1.07296	1.19826
365	ICGR 171399	T	0.603165	0.776609	0.843033		0.586578	0.795942	0.802113
366	ICGR 171400	T	0.648455	0.821728	0.888323		0.65305	0.672085	0.87766
367	ICGR 171401	T	0.657981	0.831275	0.897606		0.761081	0.884589	0.651305
368	ICGR 171402	T	0.567753	0.741068	0.807669		0.512105	0.629964	0.795951
369	ICGR 171403	T	0.778878	0.952126	1.01877		0.822021	0.971541	1.09761
370	ICGR 171404	T	1.21247	1.38584	1.45262		1.19521	1.38681	1.73691
371	ICGR 171405	T	0.641869	0.815413	0.881765		0.568279	0.855105	0.716304
372	ICGR 171406	T	0.987045	1.16024	1.22665		1.16088	1.1976	1.07818
373	ICGR 171407	T	1.05517	1.22853	1.29517		1.10361	1.28707	1.64386
374	ICGR 171408	T	0.894572	1.06785	1.13438		0.962041	1.04418	1.11147
375	ICGR 171409	T	0.814741	0.98831	1.05464		0.75752	1.09447	0.954628
376	ICGR 171410	T	0.684082	0.857287	0.923841		0.761243	0.818106	0.925364
377	ICGR 171412	T	0.679138	0.852672	0.91916		0.611064	0.86734	0.959669
378	ICGR 171413	T	0.52702	0.700599	0.767063		0.348179	0.690974	0.73171
379	ICGR 171414	T	0.590789	0.764097	0.830678		0.576083	0.714029	0.778377
380	ICGR 171415	T	0.816132	0.989785	1.05613		0.755306	1.08545	1.05658
381	ICGR 171417	T	0.87293	1.04686	1.11298		0.666135	1.33883	0.984016
382	ICGR 171418	T	0.653554	0.827351	0.89362		0.440411	0.969412	0.766697
383	ICGR 171421	T	0.82422	0.997516	1.06404		0.859192	0.905224	1.04663
384	ICGR 171422	T	1.00016	1.1735	1.24003		1.01163	1.17038	1.26494
385	ICGR 171423	T	0.357464	0.530781	0.597239		0.353356	0.519894	0.408798
386	ICGR 171425	T	0.670343	0.843797	0.910359		0.566057	0.788253	0.977373
387	ICGR 171426	T	0.816629	0.990848	1.05691		0.640901	1.23077	1.08093
388	ICGR 171427	T	0.718143	0.891408	0.957899		0.782211	0.806497	0.821976
389	ICGR 171428	T	0.816216	0.989375	1.05597		0.890892	0.94523	1.06728
390	ICGR 171429	T	0.762366	0.935745	1.00224		NA	NA	NA
391	ICGR 171430	T	0.967054	1.14028	1.20693		1.0631	1.08378	1.404
392	ICGR 171431	T	1.02043	1.19395	1.26038		0.994805	1.22067	1.26105
393	ICGR 171432	T	0.762197	0.935671	1.00209		0.701593	0.995899	0.926404
394	ICGR 171433	T	0.737045	0.91042	0.977071		0.708301	0.876462	1.20539
395	ICGR 171434	T	0.837504	1.01098	1.07769		0.726661	0.949897	1.418
396	ICGR 171435	T	0.885144	1.05862	1.12507		0.844449	1.06695	1.13004
397	ICGR 171436	T	0.820472	0.994048	1.06054		0.690551	1.07082	1.20906
398	ICGR 171437	T	0.597507	0.770881	0.837218		0.617966	0.779449	0.557134
399	ICGR 171438	T	1.0183	1.1917	1.25819		1.06936	1.24208	1.37503
400	ICGR 171440	T	0.949922	1.12328	1.18971		1.01845	1.22259	1.17065
401	ICGR 171441	T	1.06469	1.23818	1.3046		1.06939	1.37845	1.37717
402	ICGR 171442	T	0.508278	0.681728	0.74812		0.440026	0.701581	0.567394
403	ICGR 171443	T	0.993648	1.16703	1.23352		1.0006	1.21317	1.26575
404	ICGR 171444	T	0.830209	1.00362	1.07006		0.816861	1.00397	1.04269
405	ICGR 171445	T	1.20113	1.37506	1.44132		1.10509	1.51254	1.50479
406	ICGR 171446	T	1.29857	1.47187	1.53846		1.37847	1.46702	1.70401
407	ICGR 171447	T	0.847501	1.02098	1.08753		0.810441	1.03773	1.16958
408	ICGR 171448	T	0.949804	1.12332	1.18984		0.914402	1.24545	1.43062
409	ICGR 171449	T	0.838908	1.01239	1.07874		0.852863	1.08635	1.08115
410	ICGR 171450	T	0.8303	1.00365	1.07018		0.90161	1.03046	1.14632
411	ICGR 171451	T	0.819439	0.992511	1.05933		0.870933	0.911411	1.19167
412	ICGR 171452	T	0.587678	0.761266	0.827722		0.456786	0.832511	0.851005
413	ICGR 171453	T	0.740897	0.914535	0.980832		0.652746	1.08385	0.906527
414	ICGR 171454	T	0.662739	0.836297	0.90274		0.557814	0.876771	0.918802
415	ICGR 171455	T	0.66248	0.835769	0.902346		0.689386	0.791881	0.91957
416	ICGR 171456	T	0.543662	0.717194	0.783524		0.470174	0.752565	0.578985
417	ICGR 171457	T	0.660246	0.833634	0.900232		0.642512	0.829727	1.06262
418	ICGR 171458	T	0.674543	0.847947	0.914476		0.671003	0.870317	0.952501
419	ICGR 171459	T	0.814132	0.987914	1.05424		0.601818	1.13603	1.00777
420	ICGR 171460	T	0.725137	0.898547	0.965039		0.698605	0.900499	0.954383
421	ICGR 171461	T	0.762366	0.935745	1.00224		NA	NA	NA
422	ICGR 171462	T	0.933189	1.10654	1.17318		0.976644	1.14587	1.43308
423	ICGR 171464	T	0.715053	0.888236	0.95475		0.774614	0.834401	0.89021
424	ICGR 171465	T	0.992067	1.16545	1.23199		0.994425	1.16144	1.28425
425	ICGR 171466	T	0.568797	0.742188	0.808659		0.534948	0.715043	0.78628
426	ICGR 171467	T	0.952216	1.12599	1.19246		0.876006	1.18718	1.33776
427	ICGR 171468	T	0.708379	0.881769	0.948326		0.670566	0.875858	1.03958
428	ICGR 171469	T	0.651334	0.824617	0.891254		0.628241	0.766027	0.998483
429	ICGR 171470	T	0.652632	0.82621	0.892715		0.555178	0.91959	1.03438
430	ICGR 171471	T	0.445986	0.619049	0.685638		0.557167	0.463541	0.53146
431	ICGR 171472	T	0.9271	1.10024	1.16672		1.00295	1.06503	1.0788
432	ICGR 171473	T	0.864886	1.03834	1.10491		0.766789	1.0393	1.22043
433	ICGR 171474	T	0.746302	0.919696	0.986197		0.698622	0.879985	0.935767
434	ICGR 171475	T	0.628759	0.802021	0.868378		0.745175	0.784259	0.559421
435	ICGR 171476	T	0.927816	1.10137	1.1679		0.852716	1.1819	1.36706
436	ICGR 171477	T	0.733193	0.906194	0.972843		0.822856	0.824178	0.940112
437	ICGR 171478	T	0.917837	1.09126	1.15766		0.950417	1.16281	1.07024
438	ICGR 171479	T	0.770142	0.943428	1.0101		0.814422	0.912067	1.24882
439	ICGR 171480	T	0.76471	0.9381	1.00459		0.789474	1.00556	1.07083
440	ICGR 171481	T	0.866019	1.03923	1.1056		0.959265	1.04929	0.971178
441	ICGR 171482	T	0.605977	0.779316	0.845679		0.639858	0.748469	0.585202
442	ICGR 171483	T	0.816214	0.989599	1.05609		0.8168	0.957845	1.08727
443	ICGR 171484	T	0.815061	0.988436	1.05481		0.848822	1.03432	0.847384
444	ICGR 171485	T	0.793696	0.967145	1.03355		0.789632	1.03597	0.950188
445	ICGR 171486	T	0.513865	0.687007	0.753612		0.598565	0.499126	0.659528
446	ICGR 171487	T	0.507838	0.681248	0.747856		0.44862	0.621334	0.74035
447	ICGR 171488	T	0.675095	0.848817	0.915142		0.52767	1.00041	0.863001
448	ICGR 171489	T	0.984977	1.15842	1.22493		1.01558	1.25747	1.37503
449	ICGR 171490	T	0.734808	0.908141	0.974684		0.740941	0.906091	1.0213
450	ICGR 171491	T	0.858614	1.03201	1.09848		0.889687	1.10143	1.12781
451	ICGR 171492	T	0.760627	0.934024	1.00054		0.714255	0.910157	1.02875
452	ICGR 171493	T	0.630855	0.804139	0.870658		0.65292	0.762624	0.795312
453	ICGR 171494	T	0.62814	0.801591	0.86812		0.596802	0.812833	0.921825
454	ICGR 171495	T	0.889471	1.06287	1.12942		0.892167	1.08059	1.23435
455	ICGR 171496	T	0.906364	1.07978	1.14633		0.853636	1.07517	1.28405
456	ICGR 171497	T	0.798595	0.971862	1.0384		0.840953	0.964176	1.05484
457	ICGR 171498	T	1.00011	1.17331	1.23989		1.08322	1.12431	1.30818
458	ICGR 171499	T	0.80254	0.975955	1.04241		0.776589	0.980832	1.05812
459	ICGR 171500	T	0.943507	1.1167	1.18342		0.963249	1.07173	1.30652
460	ICGR 171501	T	0.948914	1.12232	1.18886		0.934358	1.13608	1.27876
461	ICGR 171502	T	0.762366	0.935745	1.00224		NA	NA	NA
462	ICGR 171503	T	0.472624	0.646073	0.712497		0.419675	0.632282	0.57093
463	ICGR 171504	T	0.752615	0.925916	0.992327		0.827158	0.89919	0.809752
464	ICGR 171505	T	0.674486	0.847922	0.914539		0.596962	0.841534	1.0736
465	ICGR 171506	T	0.679064	0.852514	0.919077		0.600148	0.824075	1.03586
466	ICGR 171507	T	0.937392	1.11053	1.1771		1.03801	0.996809	1.1401
467	ICGR 171508	T	0.780808	0.954264	1.02089		0.760498	0.950329	1.13345
468	ICGR 171509	T	0.72753	0.901128	0.967575		0.658953	0.937731	0.993136
469	ICGR 171510	T	0.877911	1.05111	1.11767		0.947264	1.0679	1.15688
470	ICGR 171511	T	0.712661	0.886177	0.952462		0.697915	0.984455	0.721174
471	ICGR 171512	T	0.66452	0.837839	0.904384		0.673417	0.763107	0.867309
472	ICGR 171513	T	0.793563	0.967061	1.03354		0.727556	1.0173	1.0752
473	ICGR 171514	T	0.62979	0.803289	0.869674		0.552423	0.784118	0.721887
474	ICGR 171515	T	1.01591	1.1893	1.25598		0.988952	1.2315	1.57711
475	ICGR 171516	T	0.551634	0.724961	0.791565		0.518543	0.634096	0.861432
476	ICGR 171517	T	0.478598	0.651903	0.718249		0.468122	0.56868	0.503618
477	ICGR 171518	T	1.00843	1.18186	1.24821		1.04336	1.35176	1.18944
478	ICGR 171519	T	0.777941	0.951196	1.0178		0.788123	0.899102	1.05718
479	ICGR 171520	T	0.768152	0.941715	1.00813		0.677782	0.970086	0.970637
480	ICGR 171521	T	0.528931	0.70228	0.768693		0.53159	0.692863	0.664977
481	ICGR 171522	T	0.54856	0.721982	0.78848		0.509478	0.720938	0.774151
482	ICGR 171523	T	0.902485	1.07583	1.14235		0.941566	1.04727	1.16002
483	ICGR 171524	T	0.738143	0.911549	0.977998		0.737146	0.932466	0.97182
484	ICGR 171525	T	0.824142	0.997551	1.06405		0.807322	1.01983	1.11463
485	ICGR 171526	T	0.756051	0.92961	0.996018		0.689196	1.05666	1.01652
486	ICGR 171527	T	0.56068	0.734131	0.800467		0.548452	0.731166	0.645053
487	ICGR 171528	T	0.617953	0.79138	0.857787		0.567956	0.767994	0.650733
488	ICGR 171529	T	0.66315	0.836251	0.902639		0.834561	0.780948	0.548824
489	ICGR 171530	T	0.918332	1.09168	1.15821		0.946952	1.09435	1.27939
490	ICGR 171531	T	0.980036	1.15325	1.21975		1.01927	1.09347	1.19755
491	ICGR 171532	T	1.01505	1.18831	1.25484		1.10868	1.15752	1.30587
492	ICGR 171533	T	0.762366	0.935745	1.00224		NA	NA	NA
493	ICGR 171534	T	0.693339	0.866726	0.933119		0.676954	0.901489	0.766704
494	ICGR 171535	T	0.646239	0.819531	0.886023		0.666449	0.742254	0.799625
495	ICGR 171536	T	0.719076	0.892585	0.959065		0.651451	0.909741	1.00648
496	ICGR 171537	T	0.894152	1.06752	1.13414		0.888267	1.05319	1.20132
497	ICGR 171538	T	0.599018	0.772536	0.838858		0.573826	0.801977	0.751295
498	ICGR 171539	T	0.626378	0.799724	0.866368		0.579304	0.664484	0.993983
499	ICGR 171540	T	0.794254	0.967496	1.03394		0.838836	0.942001	0.937639
500	ICGR 171542	T	0.574856	0.748057	0.814709		0.581633	0.642378	0.803099
501	ICGR 171543	T	0.804138	0.977544	1.04409		0.767859	0.958535	1.12077
502	ICGR 171544	T	0.633969	0.807545	0.87399		0.52832	0.928552	0.945823
503	ICGR 171545	T	0.651789	0.825378	0.891767		0.559022	0.897373	0.850424
504	ICGR 171546	T	0.530701	0.704033	0.770544		0.551581	0.685138	0.687679
505	ICGR 171547	T	0.834997	1.00821	1.07448		0.904739	1.00143	0.844568
506	ICGR 171549	T	0.62627	0.799635	0.866149		0.613061	0.787187	0.833548
507	ICGR 171550	T	0.957838	1.13126	1.19775		0.950735	1.20083	1.25013
508	ICGR 171552	T	0.664588	0.83793	0.904378		0.692765	0.856371	0.786791
509	ICGR 171553	T	0.708537	0.882095	0.948498		0.599553	0.968219	0.937619
510	ICGR 171554	T	0.734738	0.907996	0.974545		0.808812	0.87401	0.99642
511	ICGR 171555	T	0.953111	1.12665	1.19316		0.896633	1.27283	1.42447
512	ICGR 171557	T	0.476487	0.649824	0.716311		0.442198	0.582266	0.632395
513	ICGR 171558	T	0.838546	1.01186	1.07841		0.863705	0.949882	1.11219
514	ICGR 171559	T	0.544495	0.717696	0.784249		0.564226	0.591443	0.655303
515	ICGR 171560	T	0.885439	1.05879	1.12522		0.907328	1.06914	1.10381
516	ICGR 171561	T	0.671038	0.844357	0.910875		0.690299	0.793516	0.873458
517	ICGR 171562	T	0.895545	1.06899	1.13551		0.831336	1.03475	1.25296
518	ICGR 171563	T	0.71198	0.885377	0.951874		0.710594	0.893505	0.943404
519	ICGR 171564	T	0.718048	0.891377	0.957809		0.776344	0.893409	0.807127
520	ICGR 171565	T	0.711112	0.88452	0.951015		0.696626	0.884779	1.00691
521	ICGR 171567	T	0.600081	0.773154	0.83971		0.678285	0.72389	0.736525
522	ICGR 171568	T	0.660522	0.834238	0.900663		0.461204	0.921207	0.952095
523	ICGR 171569	T	0.75984	0.93315	0.999739		0.766862	0.896194	1.10526
524	ICGR 171570	T	0.740429	0.913766	0.9802		0.78253	0.933182	0.911996
525	ICGR 171571	T	0.891211	1.06446	1.1311		0.914994	1.03827	1.23126
526	ICGR 171572	T	0.728917	0.902349	0.968657		0.726059	0.974459	0.669927
527	ICGR 171573	T	0.423693	0.597028	0.663378		0.443673	0.558019	0.495308
528	ICGR 171574	T	0.727796	0.90122	0.967696		0.677445	0.908482	0.940699
529	ICGR 171575	T	0.874235	1.04791	1.11431		0.723043	1.14661	1.18194
530	ICGR 171576	T	0.390413	0.563811	0.630307		0.365948	0.549279	0.605364
531	ICGR 171577	T	0.815706	0.98913	1.05545		0.809511	1.01637	0.936734
532	ICGR 171578	T	0.661774	0.835152	0.901706		0.638589	0.836316	0.944632
533	ICGR 171579	T	0.830865	1.00426	1.07083		0.799351	0.953816	1.11353
534	ICGR 171580	T	0.696486	0.86999	0.936387		0.664458	0.863043	0.899655
535	ICGR 171581	T	0.836582	1.01002	1.07659		0.803969	0.987432	1.23868
536	ICGR 171582	T	1.06245	1.2357	1.30225		1.14463	1.21082	1.33841
537	ICGR 171583	T	0.728153	0.901566	0.967993		0.701166	0.970556	0.914553
538	ICGR 171584	T	0.956048	1.12935	1.1959		1.02267	1.1432	1.33246
539	ICGR 171585	T	0.769172	0.942457	1.00911		0.782782	0.849302	1.11937
540	ICGR 171586	T	1.01756	1.19094	1.25743		1.0297	1.20849	1.30296
541	ICGR 171587	T	0.605178	0.778392	0.844937		0.693287	0.701113	0.741836
542	ICGR 171588	T	0.63099	0.8042	0.870785		0.688886	0.727526	0.831991
543	ICGR 171589	T	0.816252	0.989591	1.0561		0.857814	0.959015	1.03874
544	ICGR 171590	T	0.718071	0.891364	0.957919		0.735386	0.888283	0.97767
545	ICGR 171591	T	0.747344	0.920558	0.987198		0.765096	0.884493	1.03593
546	ICGR 171592	T	0.754428	0.927743	0.994161		0.804747	0.950729	0.875989
547	ICGR 171593	T	0.706028	0.879342	0.945911		0.682529	0.777923	0.975155
548	ICGR 171594	T	0.724011	0.897328	0.963797		0.740427	0.889001	0.839132
549	ICGR 171595	T	0.579521	0.752884	0.819412		0.55459	0.741155	0.834925
550	ICGR 171596	T	1.00824	1.18138	1.24821		1.05904	1.12301	1.37772
551	ICGR 171597	T	0.784524	0.957961	1.02449		0.731134	0.942725	1.0978
552	ICGR 171598	T	0.71231	0.88572	0.952266		0.664504	0.856649	0.964575
553	ICGR 171599	T	0.689208	0.862508	0.928967		0.729398	0.816428	0.798864
554	ICGR 171600	T	0.919941	1.09345	1.16002		0.839378	1.15862	1.42218
555	ICGV 91114	P	0.669493	0.842699	0.909104		0.802415	0.871809	0.647957
556	ICGV6040	P	0.650894	0.824106	0.890553		0.703896	0.708575	0.642414
557	55-437	P	0.779878	0.953486	1.01997		0.703224	1.00784	1.11956
558	ICGV00440	P	0.964055	1.13741	1.20403		0.970888	1.10381	1.46728
559	ICGV00308	P	0.813862	0.987085	1.05364		0.838256	0.953552	1.06311
560	GPBD 4	P	0.677433	0.850698	0.9172		0.730732	0.822849	0.858129
561	ICGV5155	P	0.879784	1.05315	1.11958		0.924633	1.09066	1.042
562	ICGV 88145	P	0.815766	0.988906	1.05564		0.842089	0.918105	1.16249
563	ICGV02266	C	0.809211	0.982449	1.04899		0.899364	0.97412	1.04423
564	ICGV03042	C	0.620988	0.794328	0.860969		0.632668	0.808608	0.989024
565	ICGV03043	C	0.423819	0.597084	0.663691		0.399777	0.487733	0.650619
566	ICGV6420	C	0.832311	1.00558	1.07217		0.86734	0.979631	1.11928
567	ICGV 14421	C	0.531582	0.704868	0.771492		0.501366	0.600485	0.845831
568	ICGV 86105	C	0.98504	1.15857	1.22459		1.09829	1.45962	0.792426
569	GG 20	C	0.572816	0.746501	0.812584		0.499797	0.810708	0.55259
570	JL 24	C	0.667048	0.840331	0.906748		0.73677	0.77833	0.732711
571	M 335	C	0.952852	1.12622	1.19278		0.966519	1.14355	1.32373
572	ICGS 76	C	0.79704	0.970345	1.03694		0.813427	0.896988	1.10305
573	ICGV 171174	C	0.918621	1.09204	1.15852		0.980474	1.18134	1.20845
574	TMV 2	C	0.862416	1.03589	1.10239		0.844481	1.13293	1.26748
