# Supplementary material for: Unravelling Genetic Determinants of Shell Thickness in Groundnut: Insights from a Genome-Wide Association Study
Source: Research Square preprint supplement (doi:10.21203/rs.3.rs-6967967/v1), 2025-07-03
Supplement: Supplementary file 2 [file 91e97f33c2f87ab58dbad75b.xlsx]

## Sheet: List of candidate genes
Supplementary Table S3: List of potential candidate genes and their functions associated with shell thickness
	SNP ID	Chr	Gene	Sart	End	Length	Gene description
	AX_176797873	A02	Aradu.674AT	8079494	8079945	451	GRF zinc finger protein
	AX_176794614	A10	Aradu.0CR3J	4792068	4796359	4291	Major facilitator superfamily protein
			Aradu.2VD1T	4787789	4791865	4076	inorganic pyrophosphatase
			Aradu.4GR15	4871397	4880329	8932	RNA-dependent RNA polymerase family protein
			Aradu.54FG7	4838271	4839731	1460	Phox/Bem1p
			Aradu.8LT75	4801015	4807797	6782	Candidate membrane component of K+ transport systems
			Aradu.GN16C	4823272	4831817	8545	fatty acid amide hydrolase-like
			Aradu.JL9XL	4812590	4816983	4393	Zinc finger, RING/FYVE/PHD-type
	AX_176823552	B04	Araip.28L5S	123648062	123648579	517	transmembrane protein, putative
			Araip.4B1GU	123632436	123634465	2029	probable glucan endo-1,3-beta-glucosidase A6-like
			Araip.95C8Z	123614265	123618382	4117	biotin carboxyl carrier acetyl-CoA carboxylase
			Araip.HL18M	123676285	123680513	4228	RNA-binding LUC7-like protein
			Araip.I1CUB	123681905	123684831	2926	histidinol dehydrogenase
	AX_147217955	A03	Aradu.C8RQG	125080857	125086099	5242	purple acid phosphatase 27
			Aradu.FW65S	125092478	125097548	5070	DEAD-box ATP-dependent RNA helicase
			Aradu.Q016U	125087811	125089636	1825	wall-associated receptor kinase-like 15-like
			Aradu.QUJ54	125078613	125080350	1737	splicing factor 3B subunit 5/RDS3 complex subunit 10
			Aradu.U9WH5	125101026	125103686	2660	IAA-amino acid hydrolase ILR1-like protein
			Aradu.V5K3W	125151066	125152341	1275	CheY-like superfamily
			Aradu.ZG8VV	125118976	125123852	4876	Sterile alpha motif (SAM) domain-containing protein
	AX_176821660	B03	Araip.AB8FX	125177950	125181535	3585	polygalacturonase non-catalytic protein
			Araip.P3SU7	125149334	125152865	3531	Oxidoreductase
	AX_177642526	B08	Araip.7M3FG	4141120	4141683	563	photosystem II CP43 chlorophyll apoprotein
			Araip.AI2HG	4192720	4205816	13096	cell division cycle protein 48 homolog
			Araip.J0NWK	4140210	4140682	472	photosystem II reaction center protein Z
			Araip.X4YKT	4185193	4187197	2004	SNF1-related kinase regulatory subunit beta-2
	AX_177641716	B08	Araip.2KT59	3791478	3798439	6961	pleckstrin-like (PH) and lipid-binding START domain protein
			Araip.2R7TR	3785393	3789626	4233	GATA transcription factor 11
			Araip.BYV33	3771868	3775233	3365	auxin response factor 10
			Araip.UJE6P	3760195	3767198	7003	SIT4 phosphatase-associated family protein
			Araip.W59UJ	3746355	3748394	2039	TOPLESS-related 1, (WD40/YVTN repeat-like-containing domain)
			Araip.W7HLW	3736514	3738195	1681	beta glucosidase 11
	AX_177642963	B08	Araip.FB87S	4004694	4014339	9645	BEL1-like homeodomain protein 2-like isoform X3
			Araip.T873S	4032551	4038528	5977	Ripening related protein family
			Araip.TQ37A	3953236	3965397	12161	helicase protein MOM1-like isoform X2
			Araip.UUB38	3977805	3979052	1247	Leucine-rich repeat

## Sheet: Sheet1
List of potential candidate genes and their functions associated with shell thickness
SNP ID	Chr	Gene	Sart	End	Length	Gene description
AX_176797873	A02	Aradu.674AT	8079494	8079945	451	GRF zinc finger protein; IPR010666 (Zinc finger, GRF-type); GO:0008270 (zinc ion binding)
		Aradu.99LXR	8058019	8065376	7357	zinc ion binding
		Aradu.B1YR0	8051494	8053535	2041	APO RNA-binding protein; IPR023342 (APO domain); GO:0003723 (RNA binding)
		Aradu.LJ6PL	8006619	8022438	15819	ATP binding; GTP binding; nucleotide binding; nucleoside-triphosphatases; IPR000767 (Disease resistance protein), IPR001611 (Leucine-rich repeat), IPR011579 (ATPase domain, prokaryote), IPR027417 (P-loop containing nucleoside triphosphate hydrolase); GO:0005515 (protein binding), GO:0005524 (ATP binding), GO:0006952 (defense response), GO:0043531 (ADP binding)
AX_176794614	A10	Aradu.0CR3J	4792068	4796359	4291	Major facilitator superfamily protein; IPR011701 (Major facilitator superfamily), IPR016196 (Major facilitator superfamily domain, general substrate transporter); GO:0016021 (integral component of membrane), GO:0055085 (transmembrane transport)
		Aradu.2VD1T	4787789	4791865	4076	inorganic pyrophosphatase; IPR007770 (Protein of unknown function DUF679), IPR008162 (Inorganic pyrophosphatase); GO:0000287 (magnesium ion binding), GO:0004427 (inorganic diphosphatase activity), GO:0005737 (cytoplasm), GO:0006796 (phosphate-containing compound metabolic process)
		Aradu.4GR15	4871397	4880329	8932	RNA-dependent RNA polymerase family protein; IPR007855 (RNA-dependent RNA polymerase, eukaryotic-type); GO:0003968 (RNA-directed RNA polymerase activity)
		Aradu.54FG7	4838271	4839731	1460	octicosapeptide/Phox/Bem1p (PB1) domain-containing protein; IPR000270 (Phox/Bem1p); GO:0005515 (protein binding)
		Aradu.8LT75	4801015	4807797	6782	Candidate membrane component of K+ transport systems, Kef type n=1 Tax=Ramlibacter tataouinensis (strain ATCC BAA-407 / DSM 14655 / LMG 21543 / TTB310) RepID=F5XYC5_RAMTT; IPR006153 (Cation/H+ exchanger), IPR016040 (NAD(P)-binding domain); GO:0006812 (cation transport), GO:0006813 (potassium ion transport), GO:0015299 (solute:hydrogen antiporter activity), GO:0016021 (integral component of membra…
		Aradu.GN16C	4823272	4831817	8545	fatty acid amide hydrolase-like [Glycine max]; IPR000120 (Amidase), IPR023631 (Amidase signature domain)
		Aradu.JL9XL	4812590	4816983	4393	zinc ion binding; IPR006595 (CTLH, C-terminal LisH motif), IPR013083 (Zinc finger, RING/FYVE/PHD-type), IPR013144 (CRA domain), IPR024964 (CTLH/CRA C-terminal to LisH motif domain), IPR027370 (RING-type zinc-finger, LisH dimerisation motif), IPR027711 (Rmd5); GO:0005515 (protein binding), GO:0008270 (zinc ion binding)
		Aradu.PJ4TM	4817781	4821279	3498	Phosphoglycerate mutase family protein; IPR013078 (Histidine phosphatase superfamily, clade-1)
		Aradu.V10CR	4816608	4817126	518	uncharacterized protein LOC102665280 [Glycine max]
		Aradu.XQ1XQ	4809634	4811832	2198	methionine sulfoxide reductase B 2; IPR011057 (Mss4-like), IPR028427 (Peptide methionine sulfoxide reductase); GO:0006979 (response to oxidative stress), GO:0030091 (protein repair), GO:0033743 (peptide-methionine (R)-S-oxide reductase activity), GO:0055114 (oxidation-reduction process)
AX_176823552	B04	Araip.28L5S	123648062	123648579	517	transmembrane protein, putative
		Araip.3CV6X	123656265	123657709	1444	transmembrane protein, putative
		Araip.4B1GU	123632436	123634465	2029	probable glucan endo-1,3-beta-glucosidase A6-like [Glycine max]; IPR000490 (Glycoside hydrolase, family 17), IPR012946 (X8), IPR017853 (Glycoside hydrolase, superfamily); GO:0005975 (carbohydrate metabolic process)
		Araip.52T5B	123610691	123612055	1364	Protein of unknown function, DUF538; IPR007493 (Protein of unknown function DUF538)
		Araip.95C8Z	123614265	123618382	4117	biotin carboxyl carrier acetyl-CoA carboxylase; IPR000089 (Biotin/lipoyl attachment), IPR001249 (Acetyl-CoA biotin carboxyl carrier); GO:0003989 (acetyl-CoA carboxylase activity), GO:0006633 (fatty acid biosynthetic process), GO:0009317 (acetyl-CoA carboxylase complex)
		Araip.FJQ25	123646642	123647718	1076	Unknown protein
		Araip.HL18M	123676285	123680513	4228	RNA-binding LUC7-like protein; IPR004882 (Luc7-related); GO:0003729 (mRNA binding), GO:0005685 (U1 snRNP), GO:0006376 (mRNA splice site selection)
		Araip.I1CUB	123681905	123684831	2926	histidinol dehydrogenase
AX_147217955	A03	Aradu.963L7	125124547	125129140	4593	uncharacterized protein LOC100789468 isoform X1 [Glycine max]
		Aradu.C8RQG	125080857	125086099	5242	purple acid phosphatase 27; IPR004843 (Calcineurin-like phosphoesterase domain, apaH type), IPR008963 (Purple acid phosphatase-like, N-terminal), IPR025733 (Iron/zinc purple acid phosphatase-like C-terminal domain); GO:0003993 (acid phosphatase activity), GO:0016787 (hydrolase activity), GO:0046872 (metal ion binding)
		Aradu.FW65S	125092478	125097548	5070	DEAD-box ATP-dependent RNA helicase; IPR001650 (Helicase, C-terminal), IPR014001 (Helicase, superfamily 1/2, ATP-binding domain), IPR027417 (P-loop containing nucleoside triphosphate hydrolase); GO:0003676 (nucleic acid binding), GO:0004386 (helicase activity), GO:0005524 (ATP binding), GO:0008026 (ATP-dependent helicase activity)
		Aradu.Q016U	125087811	125089636	1825	wall-associated receptor kinase-like 15-like [Glycine max]; IPR025287 (Wall-associated receptor kinase galacturonan-binding domain); GO:0030247 (polysaccharide binding)
		Aradu.QUJ54	125078613	125080350	1737	splicing factor 3B subunit 5/RDS3 complex subunit 10; IPR009846 (Splicing factor 3B subunit 5/RDS3 complex subunit 10)
		Aradu.R5BK2	125069272	125071511	2239	unknown protein; FUNCTIONS IN: molecular_function unknown; INVOLVED IN: biological_process unknown; LOCATED IN: chloroplast; EXPRESSED IN: 23 plant structures; EXPRESSED DURING: 13 growth stages; Has 24 Blast hits to 24 proteins in 8 species: Archae - 0; Bacteria - 0; Metazoa - 0; Fungi - 0; Plants - 24; Viruses - 0; Other Eukaryotes - 0 (source: NCBI BLink).
		Aradu.U9WH5	125101026	125103686	2660	IAA-amino acid hydrolase ILR1-like protein; IPR002933 (Peptidase M20); GO:0008152 (metabolic process), GO:0016787 (hydrolase activity)
		Aradu.V5K3W	125151066	125152341	1275	response regulator 3; IPR011006 (CheY-like superfamily); GO:0000156 (phosphorelay response regulator activity), GO:0000160 (phosphorelay signal transduction system)
		Aradu.XE1XQ	125061972	125067808	5836	uncharacterized protein LOC100809644 isoform X3 [Glycine max]; IPR011320 (Ribonuclease H1, N-terminal), IPR012337 (Ribonuclease H-like domain); GO:0003676 (nucleic acid binding)
		Aradu.ZG8VV	125118976	125123852	4876	Sterile alpha motif (SAM) domain-containing protein; IPR013761 (Sterile alpha motif/pointed domain); GO:0005515 (protein binding)
AX_176821660	B03	Araip.4FB1W	125153888	125156449	2561	Nucleic acid-binding, OB-fold-like protein; IPR012340 (Nucleic acid-binding, OB-fold)
		Araip.AB8FX	125177950	125181535	3585	polygalacturonase non-catalytic protein; IPR004873 (BURP domain)
		Araip.P3SU7	125149334	125152865	3531	Oxidoreductase, zinc-binding dehydrogenase family protein; IPR002085 (Alcohol dehydrogenase superfamily, zinc-type), IPR016040 (NAD(P)-binding domain), IPR020843 (Polyketide synthase, enoylreductase); GO:0008270 (zinc ion binding), GO:0016491 (oxidoreductase activity), GO:0055114 (oxidation-reduction process)
		Araip.T85A3	125139270	125149347	10077	carbonic anhydrase 2; IPR001765 (Carbonic anhydrase); GO:0004089 (carbonate dehydratase activity), GO:0008270 (zinc ion binding)
AX_177642526	B08	Araip.7M3FG	4141120	4141683	563	photosystem II CP43 chlorophyll apoprotein; IPR000932 (Photosystem antenna protein-like); GO:0009521 (photosystem), GO:0009767 (photosynthetic electron transport chain), GO:0016020 (membrane), GO:0016168 (chlorophyll binding)
		Araip.AI2HG	4192720	4205816	13096	cell division cycle protein 48 homolog [Glycine max]; IPR004201 (CDC48, domain 2), IPR009010 (Aspartate decarboxylase-like domain), IPR027417 (P-loop containing nucleoside triphosphate hydrolase); GO:0005524 (ATP binding)
		Araip.B9DHE	4190309	4190620	311	hypothetical protein
		Araip.J0NWK	4140210	4140682	472	photosystem II reaction center protein Z; IPR002644 (Photosystem II PsbZ, reaction centre); GO:0009523 (photosystem II), GO:0009539 (photosystem II reaction center), GO:0015979 (photosynthesis), GO:0042549 (photosystem II stabilization)
		Araip.Q8I1A	4141753	4142141	388	photosystem II CP43 chlorophyll apoprotein; IPR000932 (Photosystem antenna protein-like); GO:0009521 (photosystem), GO:0009767 (photosynthetic electron transport chain), GO:0016020 (membrane), GO:0016168 (chlorophyll binding)
		Araip.X4YKT	4185193	4187197	2004	SNF1-related kinase regulatory subunit beta-2; IPR006828 (5-AMP-activated protein kinase, beta subunit, interaction domain); GO:0005515 (protein binding)
		Araip.Y4B25	4177041	4177621	580	Unknown protein
AX_177641716	B08	Araip.2KT59	3791478	3798439	6961	pleckstrin-like (PH) and lipid-binding START domain protein; IPR002913 (START domain), IPR009769 (Domain of unknown function DUF1336), IPR011993 (Pleckstrin homology-like domain), IPR023393 (START-like domain); GO:0008289 (lipid binding)
		Araip.2R7TR	3785393	3789626	4233	GATA transcription factor 11; IPR013088 (Zinc finger, NHR/GATA-type); GO:0003700 (sequence-specific DNA binding transcription factor activity), GO:0008270 (zinc ion binding), GO:0043565 (sequence-specific DNA binding)
		Araip.BYV33	3771868	3775233	3365	auxin response factor 10; IPR003311 (AUX/IAA protein), IPR010525 (Auxin response factor), IPR015300 (DNA-binding pseudobarrel domain); GO:0003677 (DNA binding), GO:0005634 (nucleus), GO:0009725 (response to hormone)
		Araip.MXD2U	3718860	3723793	4933	DNA binding protein, putative n=6 Tax=rosids RepID=B9SVC7_RICCO; IPR002913 (START domain), IPR009057 (Homeodomain-like), IPR013978 (MEKHLA), IPR023393 (START-like domain); GO:0003677 (DNA binding), GO:0003700 (sequence-specific DNA binding transcription factor activity), GO:0008289 (lipid binding), GO:0043565 (sequence-specific DNA binding)
		Araip.UJE6P	3760195	3767198	7003	SIT4 phosphatase-associated family protein; IPR007587 (SIT4 phosphatase-associated protein family), IPR016024 (Armadillo-type fold); GO:0005488 (binding)
		Araip.W59UJ	3746355	3748394	2039	TOPLESS-related 1; IPR015943 (WD40/YVTN repeat-like-containing domain); GO:0005515 (protein binding)
		Araip.W7HLW	3736514	3738195	1681	beta glucosidase 11; IPR000932 (Photosystem antenna protein-like), IPR001360 (Glycoside hydrolase, family 1), IPR017853 (Glycoside hydrolase, superfamily); GO:0005975 (carbohydrate metabolic process), GO:0009521 (photosystem), GO:0009767 (photosynthetic electron transport chain), GO:0016020 (membrane), GO:0016168 (chlorophyll binding)
AX_177642963	B08	Araip.FB87S	4004694	4014339	9645	BEL1-like homeodomain protein 2-like isoform X3 [Glycine max]; IPR006563 (POX domain), IPR009057 (Homeodomain-like); GO:0003677 (DNA binding), GO:0003700 (sequence-specific DNA binding transcription factor activity), GO:0043565 (sequence-specific DNA binding)
		Araip.PI3PE	4001840	4002112	272	hypothetical protein
		Araip.T873S	4032551	4038528	5977	Ripening related protein family
		Araip.TQ37A	3953236	3965397	12161	helicase protein MOM1-like isoform X2 [Glycine max]; IPR013083 (Zinc finger, RING/FYVE/PHD-type), IPR016197 (Chromo domain-like), IPR027417 (P-loop containing nucleoside triphosphate hydrolase); GO:0005515 (protein binding), GO:0008270 (zinc ion binding)
		Araip.UUB38	3977805	3979052	1247	F-box family protein; IPR006553 (Leucine-rich repeat, cysteine-containing subtype)
