# Supplementary material for: Unravelling Genetic Determinants of Shell Thickness in Groundnut: Insights from a Genome-Wide Association Study
Source: Research Square preprint supplement (doi:10.21203/rs.3.rs-6967967/v1), 2025-07-03
Supplement: Supplementary file 3 [file 92b4073b25c3d88edcedcd2a.xlsx]

## Sheet: MAGIC population
Table S: Available Summary of MAGIC lines selected for evaluation in managed stress experiment
Sl. No.	MAGIC line	Cross	Pedigree	Source of MAGIC line	NURSERY Location
1	ICGR 171569	Cross 5/RIL 5	ICGV 91114/ICGV 88145//55-437/ICGV 00308///ICGV 6040/GPBD 4//ICGV 00440/ICGV 5155	F6-NURSERY-MAGIC-POP-8W:2822	ICRISAT, Hyderabad, INDIA
2	ICGR 171498	Cross 5/RIL 5	ICGV 91114/ICGV 88145//55-437/ICGV 00308///ICGV 6040/GPBD 4//ICGV 00440/ICGV 5155	F6-NURSERY-MAGIC-POP-8W:2472	ICRISAT, Hyderabad, INDIA
3	ICGR 171471	Cross 4/RIL 4	ICGV 91114/ICGV 5155//ICGV 6040/ICGV 88145///55-437/ICGV 00440//ICGV 00308/GPBD 4	F6-NURSERY-MAGIC-POP-8W:2367	ICRISAT, Hyderabad, INDIA
4	ICGR 171208	Cross 2/RIL 2	ICGV 91114/ICGV 00308//ICGV 6040/ICGV 00440///55-437/ICGV 5155//GPBD 4/ICGV 88145	F6-NURSERY-MAGIC-POP-8W:1092	ICRISAT, Hyderabad, INDIA
5	ICGR 171583	Cross 5/RIL 5	ICGV 91114/ICGV 88145//55-437/ICGV 00308///ICGV 6040/GPBD 4//ICGV 00440/ICGV 5155	F6-NURSERY-MAGIC-POP-8W:2899	ICRISAT, Hyderabad, INDIA
6	ICGR 171500	Cross 5/RIL 5	ICGV 91114/ICGV 88145//55-437/ICGV 00308///ICGV 6040/GPBD 4//ICGV 00440/ICGV 5155	F6-NURSERY-MAGIC-POP-8W:2487	ICRISAT, Hyderabad, INDIA
7	ICGR 171358	Cross 1/RIL 1	ICGV 91114/GPBD 4//55-437/ICGV 88145///ICGV 6040/ICGV 5155//ICGV 00440/ICGV 00308	F6-NURSERY-MAGIC-POP-8W:1789	ICRISAT, Hyderabad, INDIA
8	ICGR 171555	Cross 5/RIL 5	ICGV 91114/ICGV 88145//55-437/ICGV 00308///ICGV 6040/GPBD 4//ICGV 00440/ICGV 5155	F6-NURSERY-MAGIC-POP-8W:2730	ICRISAT, Hyderabad, INDIA
9	ICGR 171404	Cross 4/RIL 4	ICGV 91114/ICGV 5155//ICGV 6040/ICGV 88145///55-437/ICGV 00440//ICGV 00308/GPBD 4	F6-NURSERY-MAGIC-POP-8W:2066	ICRISAT, Hyderabad, INDIA
10	ICGR 171323	Cross 1/RIL 1	ICGV 91114/GPBD 4//55-437/ICGV 88145///ICGV 6040/ICGV 5155//ICGV 00440/ICGV 00308	F6-NURSERY-MAGIC-POP-8W:1638	ICRISAT, Hyderabad, INDIA
11	ICGR 171180	Cross 2/RIL 2	ICGV 91114/ICGV 00308//ICGV 6040/ICGV 00440///55-437/ICGV 5155//GPBD 4/ICGV 88145	F6-NURSERY-MAGIC-POP-8W:951	ICRISAT, Hyderabad, INDIA
12	ICGR 171493	Cross 5/RIL 5	ICGV 91114/ICGV 88145//55-437/ICGV 00308///ICGV 6040/GPBD 4//ICGV 00440/ICGV 5155	F6-NURSERY-MAGIC-POP-8W:2461	ICRISAT, Hyderabad, INDIA
13	ICGR 171460	Cross 4/RIL 4	ICGV 91114/ICGV 5155//ICGV 6040/ICGV 88145///55-437/ICGV 00440//ICGV 00308/GPBD 4	F6-NURSERY-MAGIC-POP-8W:2335	ICRISAT, Hyderabad, INDIA
14	ICGR 171422	Cross 4/RIL 4	ICGV 91114/ICGV 5155//ICGV 6040/ICGV 88145///55-437/ICGV 00440//ICGV 00308/GPBD 4	F6-NURSERY-MAGIC-POP-8W:2162	ICRISAT, Hyderabad, INDIA
15	ICGR 171170	Cross 2/RIL 2	ICGV 91114/ICGV 00308//ICGV 6040/ICGV 00440///55-437/ICGV 5155//GPBD 4/ICGV 88145	F6-NURSERY-MAGIC-POP-8W:894	ICRISAT, Hyderabad, INDIA
16	ICGR 171199	Cross 2/RIL 2	ICGV 91114/ICGV 00308//ICGV 6040/ICGV 00440///55-437/ICGV 5155//GPBD 4/ICGV 88145	F6-NURSERY-MAGIC-POP-8W:1041	ICRISAT, Hyderabad, INDIA
17	ICGR 171517	Cross 5/RIL 5	ICGV 91114/ICGV 88145//55-437/ICGV 00308///ICGV 6040/GPBD 4//ICGV 00440/ICGV 5155	F6-NURSERY-MAGIC-POP-8W:2561	ICRISAT, Hyderabad, INDIA
18	ICGR 171064	Cross 3/RIL 3	ICGV 91114/ICGV 00440//ICGV 6040/ICGV 00308///55-437/GPBD 4//ICGV 5155/ICGV 88145	F6-NURSERY-MAGIC-POP-8W:324	ICRISAT, Hyderabad, INDIA
19	ICGR 171334	Cross 1/RIL 1	ICGV 91114/GPBD 4//55-437/ICGV 88145///ICGV 6040/ICGV 5155//ICGV 00440/ICGV 00308	F6-NURSERY-MAGIC-POP-8W:1699	ICRISAT, Hyderabad, INDIA
20	ICGR 171282	Cross 1/RIL 1	ICGV 91114/GPBD 4//55-437/ICGV 88145///ICGV 6040/ICGV 5155//ICGV 00440/ICGV 00308	F6-NURSERY-MAGIC-POP-8W:1409	ICRISAT, Hyderabad, INDIA
21	ICGR 171399	Cross 4/RIL 4	ICGV 91114/ICGV 5155//ICGV 6040/ICGV 88145///55-437/ICGV 00440//ICGV 00308/GPBD 4	F6-NURSERY-MAGIC-POP-8W:2031	ICRISAT, Hyderabad, INDIA
22	ICGR 171350	Cross 1/RIL 1	ICGV 91114/GPBD 4//55-437/ICGV 88145///ICGV 6040/ICGV 5155//ICGV 00440/ICGV 00308	F6-NURSERY-MAGIC-POP-8W:1760	ICRISAT, Hyderabad, INDIA
23	ICGR 171353	Cross 1/RIL 1	ICGV 91114/GPBD 4//55-437/ICGV 88145///ICGV 6040/ICGV 5155//ICGV 00440/ICGV 00308	F6-NURSERY-MAGIC-POP-8W:1770	ICRISAT, Hyderabad, INDIA
24	ICGR 171089	Cross 3/RIL 3	ICGV 91114/ICGV 00440//ICGV 6040/ICGV 00308///55-437/GPBD 4//ICGV 5155/ICGV 88145	F6-NURSERY-MAGIC-POP-8W:439	ICRISAT, Hyderabad, INDIA
25	ICGR 171079	Cross 3/RIL 3	ICGV 91114/ICGV 00440//ICGV 6040/ICGV 00308///55-437/GPBD 4//ICGV 5155/ICGV 88145	F6-NURSERY-MAGIC-POP-8W:408	ICRISAT, Hyderabad, INDIA
26	ICGR 171489	Cross 5/RIL 5	ICGV 91114/ICGV 88145//55-437/ICGV 00308///ICGV 6040/GPBD 4//ICGV 00440/ICGV 5155	F6-NURSERY-MAGIC-POP-8W:2454	ICRISAT, Hyderabad, INDIA
27	ICGR 171121	Cross 2/RIL 2	ICGV 91114/ICGV 00308//ICGV 6040/ICGV 00440///55-437/ICGV 5155//GPBD 4/ICGV 88145	F6-NURSERY-MAGIC-POP-8W:605	ICRISAT, Hyderabad, INDIA
28	ICGR 171155	Cross 2/RIL 2	ICGV 91114/ICGV 00308//ICGV 6040/ICGV 00440///55-437/ICGV 5155//GPBD 4/ICGV 88145	F6-NURSERY-MAGIC-POP-8W:831	ICRISAT, Hyderabad, INDIA
29	ICGV 88145	Parent	(PI337409 × FESR-12B6-B1-B1-B1-B)	ICRISAT	ICRISAT, Hyderabad, INDIA
30	ICGR 171004	Cross 3/RIL 3	ICGV 91114/ICGV 00440//ICGV 6040/ICGV 00308///55-437/GPBD 4//ICGV 5155/ICGV 88145	F6-NURSERY-MAGIC-POP-8W:19	ICRISAT, Hyderabad, INDIA
31	ICGR 171154	Cross 2/RIL 2	ICGV 91114/ICGV 00308//ICGV 6040/ICGV 00440///55-437/ICGV 5155//GPBD 4/ICGV 88145	F6-NURSERY-MAGIC-POP-8W:828	ICRISAT, Hyderabad, INDIA
32	ICGR 171418	Cross 4/RIL 4	ICGV 91114/ICGV 5155//ICGV 6040/ICGV 88145///55-437/ICGV 00440//ICGV 00308/GPBD 4	F6-NURSERY-MAGIC-POP-8W:2140	ICRISAT, Hyderabad, INDIA
33	ICGR 171331	Cross 1/RIL 1	ICGV 91114/GPBD 4//55-437/ICGV 88145///ICGV 6040/ICGV 5155//ICGV 00440/ICGV 00308	F6-NURSERY-MAGIC-POP-8W:1685	ICRISAT, Hyderabad, INDIA
34	ICGR 171388	Cross 4/RIL 4	ICGV 91114/ICGV 5155//ICGV 6040/ICGV 88145///55-437/ICGV 00440//ICGV 00308/GPBD 4	F6-NURSERY-MAGIC-POP-8W:1962	ICRISAT, Hyderabad, INDIA
35	ICGR 171023	Cross 3/RIL 3	ICGV 91114/ICGV 00440//ICGV 6040/ICGV 00308///55-437/GPBD 4//ICGV 5155/ICGV 88145	F6-NURSERY-MAGIC-POP-8W:94	ICRISAT, Hyderabad, INDIA
36	ICGR 171542	Cross 5/RIL 5	ICGV 91114/ICGV 88145//55-437/ICGV 00308///ICGV 6040/GPBD 4//ICGV 00440/ICGV 5155	F6-NURSERY-MAGIC-POP-8W:2678	ICRISAT, Hyderabad, INDIA
37	ICGR 171336	Cross 1/RIL 1	ICGV 91114/GPBD 4//55-437/ICGV 88145///ICGV 6040/ICGV 5155//ICGV 00440/ICGV 00308	F6-NURSERY-MAGIC-POP-8W:1704	ICRISAT, Hyderabad, INDIA
38	ICGR 171045	Cross 3/RIL 3	ICGV 91114/ICGV 00440//ICGV 6040/ICGV 00308///55-437/GPBD 4//ICGV 5155/ICGV 88145	F6-NURSERY-MAGIC-POP-8W:222	ICRISAT, Hyderabad, INDIA
39	ICGR 171372	Cross 4/RIL 4	ICGV 91114/ICGV 5155//ICGV 6040/ICGV 88145///55-437/ICGV 00440//ICGV 00308/GPBD 4	F6-NURSERY-MAGIC-POP-8W:1871	ICRISAT, Hyderabad, INDIA
40	ICGR 171259	Cross 1/RIL 1	ICGV 91114/GPBD 4//55-437/ICGV 88145///ICGV 6040/ICGV 5155//ICGV 00440/ICGV 00308	F6-NURSERY-MAGIC-POP-8W:1274	ICRISAT, Hyderabad, INDIA
41	ICGR 171118	Cross 3/RIL 3	ICGV 91114/ICGV 00440//ICGV 6040/ICGV 00308///55-437/GPBD 4//ICGV 5155/ICGV 88145	F6-NURSERY-MAGIC-POP-8W:579	ICRISAT, Hyderabad, INDIA
42	ICGR 171243	Cross 1/RIL 1	ICGV 91114/GPBD 4//55-437/ICGV 88145///ICGV 6040/ICGV 5155//ICGV 00440/ICGV 00308	F6-NURSERY-MAGIC-POP-8W:1214	ICRISAT, Hyderabad, INDIA
43	ICGR 171514	Cross 5/RIL 5	ICGV 91114/ICGV 88145//55-437/ICGV 00308///ICGV 6040/GPBD 4//ICGV 00440/ICGV 5155	F6-NURSERY-MAGIC-POP-8W:2557	ICRISAT, Hyderabad, INDIA
44	ICGR 171527	Cross 5/RIL 5	ICGV 91114/ICGV 88145//55-437/ICGV 00308///ICGV 6040/GPBD 4//ICGV 00440/ICGV 5155	F6-NURSERY-MAGIC-POP-8W:2624	ICRISAT, Hyderabad, INDIA
45	ICGR 171405	Cross 4/RIL 4	ICGV 91114/ICGV 5155//ICGV 6040/ICGV 88145///55-437/ICGV 00440//ICGV 00308/GPBD 4	F6-NURSERY-MAGIC-POP-8W:2068	ICRISAT, Hyderabad, INDIA
46	ICGR 171109	Cross 3/RIL 3	ICGV 91114/ICGV 00440//ICGV 6040/ICGV 00308///55-437/GPBD 4//ICGV 5155/ICGV 88145	F6-NURSERY-MAGIC-POP-8W:533	ICRISAT, Hyderabad, INDIA
47	ICGR 171215	Cross 2/RIL 2	ICGV 91114/ICGV 00308//ICGV 6040/ICGV 00440///55-437/ICGV 5155//GPBD 4/ICGV 88145	F6-NURSERY-MAGIC-POP-8W:1134	ICRISAT, Hyderabad, INDIA
48	ICGR 171280	Cross 1/RIL 1	ICGV 91114/GPBD 4//55-437/ICGV 88145///ICGV 6040/ICGV 5155//ICGV 00440/ICGV 00308	F6-NURSERY-MAGIC-POP-8W:1396	ICRISAT, Hyderabad, INDIA
49	ICGR 171456	Cross 4/RIL 4	ICGV 91114/ICGV 5155//ICGV 6040/ICGV 88145///55-437/ICGV 00440//ICGV 00308/GPBD 4	F6-NURSERY-MAGIC-POP-8W:2326	ICRISAT, Hyderabad, INDIA
50	ICGR 171543	Cross 5/RIL 5	ICGV 91114/ICGV 88145//55-437/ICGV 00308///ICGV 6040/GPBD 4//ICGV 00440/ICGV 5155	F6-NURSERY-MAGIC-POP-8W:2680	ICRISAT, Hyderabad, INDIA
51	ICGR 171415	Cross 4/RIL 4	ICGV 91114/ICGV 5155//ICGV 6040/ICGV 88145///55-437/ICGV 00440//ICGV 00308/GPBD 4	F6-NURSERY-MAGIC-POP-8W:2123	ICRISAT, Hyderabad, INDIA
52	ICGR 171087	Cross 3/RIL 3	ICGV 91114/ICGV 00440//ICGV 6040/ICGV 00308///55-437/GPBD 4//ICGV 5155/ICGV 88145	F6-NURSERY-MAGIC-POP-8W:435	ICRISAT, Hyderabad, INDIA
53	ICGR 171364	Cross 4/RIL 4	ICGV 91114/ICGV 5155//ICGV 6040/ICGV 88145///55-437/ICGV 00440//ICGV 00308/GPBD 4	F6-NURSERY-MAGIC-POP-8W:1824	ICRISAT, Hyderabad, INDIA
54	ICGR 171099	Cross 3/RIL 3	ICGV 91114/ICGV 00440//ICGV 6040/ICGV 00308///55-437/GPBD 4//ICGV 5155/ICGV 88145	F6-NURSERY-MAGIC-POP-8W:479	ICRISAT, Hyderabad, INDIA
55	ICGR 171373	Cross 4/RIL 4	ICGV 91114/ICGV 5155//ICGV 6040/ICGV 88145///55-437/ICGV 00440//ICGV 00308/GPBD 4	F6-NURSERY-MAGIC-POP-8W:1872	ICRISAT, Hyderabad, INDIA
56	ICGR 171600	Cross 5/RIL 5	ICGV 91114/ICGV 88145//55-437/ICGV 00308///ICGV 6040/GPBD 4//ICGV 00440/ICGV 5155	F6-NURSERY-MAGIC-POP-8W:2995	ICRISAT, Hyderabad, INDIA
57	ICGR 171494	Cross 5/RIL 5	ICGV 91114/ICGV 88145//55-437/ICGV 00308///ICGV 6040/GPBD 4//ICGV 00440/ICGV 5155	F6-NURSERY-MAGIC-POP-8W:2462	ICRISAT, Hyderabad, INDIA
58	ICGR 171386	Cross 4/RIL 4	ICGV 91114/ICGV 5155//ICGV 6040/ICGV 88145///55-437/ICGV 00440//ICGV 00308/GPBD 4	F6-NURSERY-MAGIC-POP-8W:1950	ICRISAT, Hyderabad, INDIA
59	ICGR 171191	Cross 2/RIL 2	ICGV 91114/ICGV 00308//ICGV 6040/ICGV 00440///55-437/ICGV 5155//GPBD 4/ICGV 88145	F6-NURSERY-MAGIC-POP-8W:1009	ICRISAT, Hyderabad, INDIA
60	ICGR 171106	Cross 3/RIL 3	ICGV 91114/ICGV 00440//ICGV 6040/ICGV 00308///55-437/GPBD 4//ICGV 5155/ICGV 88145	F6-NURSERY-MAGIC-POP-8W:518	ICRISAT, Hyderabad, INDIA
61	ICGR 171428	Cross 4/RIL 4	ICGV 91114/ICGV 5155//ICGV 6040/ICGV 88145///55-437/ICGV 00440//ICGV 00308/GPBD 4	F6-NURSERY-MAGIC-POP-8W:2202	ICRISAT, Hyderabad, INDIA
62	ICGR 171437	Cross 4/RIL 4	ICGV 91114/ICGV 5155//ICGV 6040/ICGV 88145///55-437/ICGV 00440//ICGV 00308/GPBD 4	F6-NURSERY-MAGIC-POP-8W:2247	ICRISAT, Hyderabad, INDIA
63	ICGR 171076	Cross 3/RIL 3	ICGV 91114/ICGV 00440//ICGV 6040/ICGV 00308///55-437/GPBD 4//ICGV 5155/ICGV 88145	F6-NURSERY-MAGIC-POP-8W:381	ICRISAT, Hyderabad, INDIA
64	ICGR 171576	Cross 5/RIL 5	ICGV 91114/ICGV 88145//55-437/ICGV 00308///ICGV 6040/GPBD 4//ICGV 00440/ICGV 5155	F6-NURSERY-MAGIC-POP-8W:2883	ICRISAT, Hyderabad, INDIA
65	ICGR 171586	Cross 5/RIL 5	ICGV 91114/ICGV 88145//55-437/ICGV 00308///ICGV 6040/GPBD 4//ICGV 00440/ICGV 5155	F6-NURSERY-MAGIC-POP-8W:2914	ICRISAT, Hyderabad, INDIA
66	ICGR 171071	Cross 3/RIL 3	ICGV 91114/ICGV 00440//ICGV 6040/ICGV 00308///55-437/GPBD 4//ICGV 5155/ICGV 88145	F6-NURSERY-MAGIC-POP-8W:352	ICRISAT, Hyderabad, INDIA
67	ICGR 171171	Cross 2/RIL 2	ICGV 91114/ICGV 00308//ICGV 6040/ICGV 00440///55-437/ICGV 5155//GPBD 4/ICGV 88145	F6-NURSERY-MAGIC-POP-8W:895	ICRISAT, Hyderabad, INDIA
68	ICGR 171557	Cross 5/RIL 5	ICGV 91114/ICGV 88145//55-437/ICGV 00308///ICGV 6040/GPBD 4//ICGV 00440/ICGV 5155	F6-NURSERY-MAGIC-POP-8W:2742	ICRISAT, Hyderabad, INDIA
69	55-437	Parent	Unknown: ancient selection (1955)	Isra-Cirad, Senegal	ICRISAT, Hyderabad, INDIA
70	ICGR 171318	Cross 1/RIL 1	ICGV 91114/GPBD 4//55-437/ICGV 88145///ICGV 6040/ICGV 5155//ICGV 00440/ICGV 00308	F6-NURSERY-MAGIC-POP-8W:1621	ICRISAT, Hyderabad, INDIA
71	ICGR 171220	Cross 2/RIL 2	ICGV 91114/ICGV 00308//ICGV 6040/ICGV 00440///55-437/ICGV 5155//GPBD 4/ICGV 88145	F6-NURSERY-MAGIC-POP-8W:1140	ICRISAT, Hyderabad, INDIA
72	ICGR 171236	Cross 2/RIL 2	ICGV 91114/ICGV 00308//ICGV 6040/ICGV 00440///55-437/ICGV 5155//GPBD 4/ICGV 88145	F6-NURSERY-MAGIC-POP-8W:1189	ICRISAT, Hyderabad, INDIA
73	ICGR 171369	Cross 4/RIL 4	ICGV 91114/ICGV 5155//ICGV 6040/ICGV 88145///55-437/ICGV 00440//ICGV 00308/GPBD 4	F6-NURSERY-MAGIC-POP-8W:1853	ICRISAT, Hyderabad, INDIA
74	ICGR 171381	Cross 4/RIL 4	ICGV 91114/ICGV 5155//ICGV 6040/ICGV 88145///55-437/ICGV 00440//ICGV 00308/GPBD 4	F6-NURSERY-MAGIC-POP-8W:1902	ICRISAT, Hyderabad, INDIA
75	ICGR 171189	Cross 2/RIL 2	ICGV 91114/ICGV 00308//ICGV 6040/ICGV 00440///55-437/ICGV 5155//GPBD 4/ICGV 88145	F6-NURSERY-MAGIC-POP-8W:999	ICRISAT, Hyderabad, INDIA
76	ICGR 171363	Cross 4/RIL 4	ICGV 91114/ICGV 5155//ICGV 6040/ICGV 88145///55-437/ICGV 00440//ICGV 00308/GPBD 4	F6-NURSERY-MAGIC-POP-8W:1809	ICRISAT, Hyderabad, INDIA
77	ICGR 171521	Cross 5/RIL 5	ICGV 91114/ICGV 88145//55-437/ICGV 00308///ICGV 6040/GPBD 4//ICGV 00440/ICGV 5155	F6-NURSERY-MAGIC-POP-8W:2604	ICRISAT, Hyderabad, INDIA
78	ICGR 171391	Cross 4/RIL 4	ICGV 91114/ICGV 5155//ICGV 6040/ICGV 88145///55-437/ICGV 00440//ICGV 00308/GPBD 4	F6-NURSERY-MAGIC-POP-8W:1979	ICRISAT, Hyderabad, INDIA
79	ICGR 171020	Cross 3/RIL 3	ICGV 91114/ICGV 00440//ICGV 6040/ICGV 00308///55-437/GPBD 4//ICGV 5155/ICGV 88145	F6-NURSERY-MAGIC-POP-8W:72	ICRISAT, Hyderabad, INDIA
80	ICGR 171085	Cross 3/RIL 3	ICGV 91114/ICGV 00440//ICGV 6040/ICGV 00308///55-437/GPBD 4//ICGV 5155/ICGV 88145	F6-NURSERY-MAGIC-POP-8W:431	ICRISAT, Hyderabad, INDIA
81	ICGR 171440	Cross 4/RIL 4	ICGV 91114/ICGV 5155//ICGV 6040/ICGV 88145///55-437/ICGV 00440//ICGV 00308/GPBD 4	F6-NURSERY-MAGIC-POP-8W:2262	ICRISAT, Hyderabad, INDIA
82	ICGR 171591	Cross 5/RIL 5	ICGV 91114/ICGV 88145//55-437/ICGV 00308///ICGV 6040/GPBD 4//ICGV 00440/ICGV 5155	F6-NURSERY-MAGIC-POP-8W:2938	ICRISAT, Hyderabad, INDIA
83	ICGR 171166	Cross 2/RIL 2	ICGV 91114/ICGV 00308//ICGV 6040/ICGV 00440///55-437/ICGV 5155//GPBD 4/ICGV 88145	F6-NURSERY-MAGIC-POP-8W:876	ICRISAT, Hyderabad, INDIA
84	ICGR 171485	Cross 5/RIL 5	ICGV 91114/ICGV 88145//55-437/ICGV 00308///ICGV 6040/GPBD 4//ICGV 00440/ICGV 5155	F6-NURSERY-MAGIC-POP-8W:2421	ICRISAT, Hyderabad, INDIA
85	ICGR 171203	Cross 2/RIL 2	ICGV 91114/ICGV 00308//ICGV 6040/ICGV 00440///55-437/ICGV 5155//GPBD 4/ICGV 88145	F6-NURSERY-MAGIC-POP-8W:1068	ICRISAT, Hyderabad, INDIA
86	ICGR 171032	Cross 3/RIL 3	ICGV 91114/ICGV 00440//ICGV 6040/ICGV 00308///55-437/GPBD 4//ICGV 5155/ICGV 88145	F6-NURSERY-MAGIC-POP-8W:156	ICRISAT, Hyderabad, INDIA
87	ICGR 171182	Cross 2/RIL 2	ICGV 91114/ICGV 00308//ICGV 6040/ICGV 00440///55-437/ICGV 5155//GPBD 4/ICGV 88145	F6-NURSERY-MAGIC-POP-8W:956	ICRISAT, Hyderabad, INDIA
88	ICGR 171467	Cross 4/RIL 4	ICGV 91114/ICGV 5155//ICGV 6040/ICGV 88145///55-437/ICGV 00440//ICGV 00308/GPBD 4	F6-NURSERY-MAGIC-POP-8W:2352	ICRISAT, Hyderabad, INDIA
89	ICGR 171383	Cross 4/RIL 4	ICGV 91114/ICGV 5155//ICGV 6040/ICGV 88145///55-437/ICGV 00440//ICGV 00308/GPBD 4	F6-NURSERY-MAGIC-POP-8W:1926	ICRISAT, Hyderabad, INDIA
90	ICGR 171445	Cross 4/RIL 4	ICGV 91114/ICGV 5155//ICGV 6040/ICGV 88145///55-437/ICGV 00440//ICGV 00308/GPBD 4	F6-NURSERY-MAGIC-POP-8W:2286	ICRISAT, Hyderabad, INDIA
91	ICGR 171246	Cross 1/RIL 1	ICGV 91114/GPBD 4//55-437/ICGV 88145///ICGV 6040/ICGV 5155//ICGV 00440/ICGV 00308	F6-NURSERY-MAGIC-POP-8W:1232	ICRISAT, Hyderabad, INDIA
92	ICGR 171080	Cross 3/RIL 3	ICGV 91114/ICGV 00440//ICGV 6040/ICGV 00308///55-437/GPBD 4//ICGV 5155/ICGV 88145	F6-NURSERY-MAGIC-POP-8W:414	ICRISAT, Hyderabad, INDIA
93	ICGR 171384	Cross 4/RIL 4	ICGV 91114/ICGV 5155//ICGV 6040/ICGV 88145///55-437/ICGV 00440//ICGV 00308/GPBD 4	F6-NURSERY-MAGIC-POP-8W:1943	ICRISAT, Hyderabad, INDIA
94	ICGR 171214	Cross 2/RIL 2	ICGV 91114/ICGV 00308//ICGV 6040/ICGV 00440///55-437/ICGV 5155//GPBD 4/ICGV 88145	F6-NURSERY-MAGIC-POP-8W:1131	ICRISAT, Hyderabad, INDIA
95	ICGR 171338	Cross 1/RIL 1	ICGV 91114/GPBD 4//55-437/ICGV 88145///ICGV 6040/ICGV 5155//ICGV 00440/ICGV 00308	F6-NURSERY-MAGIC-POP-8W:1707	ICRISAT, Hyderabad, INDIA
96	ICGR 171043	Cross 3/RIL 3	ICGV 91114/ICGV 00440//ICGV 6040/ICGV 00308///55-437/GPBD 4//ICGV 5155/ICGV 88145	F6-NURSERY-MAGIC-POP-8W:211	ICRISAT, Hyderabad, INDIA
97	ICGR 171149	Cross 2/RIL 2	ICGV 91114/ICGV 00308//ICGV 6040/ICGV 00440///55-437/ICGV 5155//GPBD 4/ICGV 88145	F6-NURSERY-MAGIC-POP-8W:782	ICRISAT, Hyderabad, INDIA
98	ICGR 171067	Cross 3/RIL 3	ICGV 91114/ICGV 00440//ICGV 6040/ICGV 00308///55-437/GPBD 4//ICGV 5155/ICGV 88145	F6-NURSERY-MAGIC-POP-8W:337	ICRISAT, Hyderabad, INDIA
99	ICGR 171275	Cross 1/RIL 1	ICGV 91114/GPBD 4//55-437/ICGV 88145///ICGV 6040/ICGV 5155//ICGV 00440/ICGV 00308	F6-NURSERY-MAGIC-POP-8W:1368	ICRISAT, Hyderabad, INDIA
100	ICGR 171484	Cross 5/RIL 5	ICGV 91114/ICGV 88145//55-437/ICGV 00308///ICGV 6040/GPBD 4//ICGV 00440/ICGV 5155	F6-NURSERY-MAGIC-POP-8W:2416	ICRISAT, Hyderabad, INDIA
101	ICGR 171283	Cross 1/RIL 1	ICGV 91114/GPBD 4//55-437/ICGV 88145///ICGV 6040/ICGV 5155//ICGV 00440/ICGV 00308	F6-NURSERY-MAGIC-POP-8W:1418	ICRISAT, Hyderabad, INDIA
102	ICGR 171431	Cross 4/RIL 4	ICGV 91114/ICGV 5155//ICGV 6040/ICGV 88145///55-437/ICGV 00440//ICGV 00308/GPBD 4	F6-NURSERY-MAGIC-POP-8W:2219	ICRISAT, Hyderabad, INDIA
103	ICGR 171367	Cross 4/RIL 4	ICGV 91114/ICGV 5155//ICGV 6040/ICGV 88145///55-437/ICGV 00440//ICGV 00308/GPBD 4	F6-NURSERY-MAGIC-POP-8W:1838	ICRISAT, Hyderabad, INDIA
104	ICGR 171057	Cross 3/RIL 3	ICGV 91114/ICGV 00440//ICGV 6040/ICGV 00308///55-437/GPBD 4//ICGV 5155/ICGV 88145	F6-NURSERY-MAGIC-POP-8W:290	ICRISAT, Hyderabad, INDIA
105	ICGR 171110	Cross 3/RIL 3	ICGV 91114/ICGV 00440//ICGV 6040/ICGV 00308///55-437/GPBD 4//ICGV 5155/ICGV 88145	F6-NURSERY-MAGIC-POP-8W:538	ICRISAT, Hyderabad, INDIA
106	ICGR 171269	Cross 1/RIL 1	ICGV 91114/GPBD 4//55-437/ICGV 88145///ICGV 6040/ICGV 5155//ICGV 00440/ICGV 00308	F6-NURSERY-MAGIC-POP-8W:1333	ICRISAT, Hyderabad, INDIA
107	ICGR 171175	Cross 2/RIL 2	ICGV 91114/ICGV 00308//ICGV 6040/ICGV 00440///55-437/ICGV 5155//GPBD 4/ICGV 88145	F6-NURSERY-MAGIC-POP-8W:918	ICRISAT, Hyderabad, INDIA
108	ICGR 171124	Cross 2/RIL 2	ICGV 91114/ICGV 00308//ICGV 6040/ICGV 00440///55-437/ICGV 5155//GPBD 4/ICGV 88145	F6-NURSERY-MAGIC-POP-8W:616	ICRISAT, Hyderabad, INDIA
109	ICGR 171302	Cross 1/RIL 1	ICGV 91114/GPBD 4//55-437/ICGV 88145///ICGV 6040/ICGV 5155//ICGV 00440/ICGV 00308	F6-NURSERY-MAGIC-POP-8W:1522	ICRISAT, Hyderabad, INDIA
110	ICGR 171022	Cross 3/RIL 3	ICGV 91114/ICGV 00440//ICGV 6040/ICGV 00308///55-437/GPBD 4//ICGV 5155/ICGV 88145	F6-NURSERY-MAGIC-POP-8W:90	ICRISAT, Hyderabad, INDIA
111	ICGR 171400	Cross 4/RIL 4	ICGV 91114/ICGV 5155//ICGV 6040/ICGV 88145///55-437/ICGV 00440//ICGV 00308/GPBD 4	F6-NURSERY-MAGIC-POP-8W:2041	ICRISAT, Hyderabad, INDIA
112	ICGR 171340	Cross 1/RIL 1	ICGV 91114/GPBD 4//55-437/ICGV 88145///ICGV 6040/ICGV 5155//ICGV 00440/ICGV 00308	F6-NURSERY-MAGIC-POP-8W:1712	ICRISAT, Hyderabad, INDIA
113	ICGR 171285	Cross 1/RIL 1	ICGV 91114/GPBD 4//55-437/ICGV 88145///ICGV 6040/ICGV 5155//ICGV 00440/ICGV 00308	F6-NURSERY-MAGIC-POP-8W:1435	ICRISAT, Hyderabad, INDIA
114	ICGR 171487	Cross 5/RIL 5	ICGV 91114/ICGV 88145//55-437/ICGV 00308///ICGV 6040/GPBD 4//ICGV 00440/ICGV 5155	F6-NURSERY-MAGIC-POP-8W:2435	ICRISAT, Hyderabad, INDIA
115	ICGR 171481	Cross 5/RIL 5	ICGV 91114/ICGV 88145//55-437/ICGV 00308///ICGV 6040/GPBD 4//ICGV 00440/ICGV 5155	F6-NURSERY-MAGIC-POP-8W:2409	ICRISAT, Hyderabad, INDIA
116	ICGR 171198	Cross 2/RIL 2	ICGV 91114/ICGV 00308//ICGV 6040/ICGV 00440///55-437/ICGV 5155//GPBD 4/ICGV 88145	F6-NURSERY-MAGIC-POP-8W:1035	ICRISAT, Hyderabad, INDIA
117	ICGR 171486	Cross 5/RIL 5	ICGV 91114/ICGV 88145//55-437/ICGV 00308///ICGV 6040/GPBD 4//ICGV 00440/ICGV 5155	F6-NURSERY-MAGIC-POP-8W:2432	ICRISAT, Hyderabad, INDIA
118	ICGR 171374	Cross 4/RIL 4	ICGV 91114/ICGV 5155//ICGV 6040/ICGV 88145///55-437/ICGV 00440//ICGV 00308/GPBD 4	F6-NURSERY-MAGIC-POP-8W:1878	ICRISAT, Hyderabad, INDIA
119	ICGR 171034	Cross 3/RIL 3	ICGV 91114/ICGV 00440//ICGV 6040/ICGV 00308///55-437/GPBD 4//ICGV 5155/ICGV 88145	F6-NURSERY-MAGIC-POP-8W:163	ICRISAT, Hyderabad, INDIA
120	ICGR 171025	Cross 3/RIL 3	ICGV 91114/ICGV 00440//ICGV 6040/ICGV 00308///55-437/GPBD 4//ICGV 5155/ICGV 88145	F6-NURSERY-MAGIC-POP-8W:96	ICRISAT, Hyderabad, INDIA
121	TMV 2	Check	Mass selection from “Gudhiatham bunch”	TNAU, Coimbatore	ICRISAT, Hyderabad, INDIA
122	ICGR 171031	Cross 3/RIL 3	ICGV 91114/ICGV 00440//ICGV 6040/ICGV 00308///55-437/GPBD 4//ICGV 5155/ICGV 88145	F6-NURSERY-MAGIC-POP-8W:145	ICRISAT, Hyderabad, INDIA
123	ICGR 171257	Cross 1/RIL 1	ICGV 91114/GPBD 4//55-437/ICGV 88145///ICGV 6040/ICGV 5155//ICGV 00440/ICGV 00308	F6-NURSERY-MAGIC-POP-8W:1266	ICRISAT, Hyderabad, INDIA
124	ICGR 171426	Cross 4/RIL 4	ICGV 91114/ICGV 5155//ICGV 6040/ICGV 88145///55-437/ICGV 00440//ICGV 00308/GPBD 4	F6-NURSERY-MAGIC-POP-8W:2182	ICRISAT, Hyderabad, INDIA
125	ICGR 171458	Cross 4/RIL 4	ICGV 91114/ICGV 5155//ICGV 6040/ICGV 88145///55-437/ICGV 00440//ICGV 00308/GPBD 4	F6-NURSERY-MAGIC-POP-8W:2330	ICRISAT, Hyderabad, INDIA
126	ICGV03042	Checks	ICGV 99160 × (ICGV 93124 × (LI × ICGS 44))	ICRISAT	ICRISAT, Hyderabad, INDIA
127	ICGR 171030	Cross 3/RIL 3	ICGV 91114/ICGV 00440//ICGV 6040/ICGV 00308///55-437/GPBD 4//ICGV 5155/ICGV 88145	F6-NURSERY-MAGIC-POP-8W:139	ICRISAT, Hyderabad, INDIA
128	ICGR 171516	Cross 5/RIL 5	ICGV 91114/ICGV 88145//55-437/ICGV 00308///ICGV 6040/GPBD 4//ICGV 00440/ICGV 5155	F6-NURSERY-MAGIC-POP-8W:2559	ICRISAT, Hyderabad, INDIA
129	ICGR 171141	Cross 2/RIL 2	ICGV 91114/ICGV 00308//ICGV 6040/ICGV 00440///55-437/ICGV 5155//GPBD 4/ICGV 88145	F6-NURSERY-MAGIC-POP-8W:703	ICRISAT, Hyderabad, INDIA
130	ICGR 171593	Cross 5/RIL 5	ICGV 91114/ICGV 88145//55-437/ICGV 00308///ICGV 6040/GPBD 4//ICGV 00440/ICGV 5155	F6-NURSERY-MAGIC-POP-8W:2946	ICRISAT, Hyderabad, INDIA
131	ICGR 171178	Cross 2/RIL 2	ICGV 91114/ICGV 00308//ICGV 6040/ICGV 00440///55-437/ICGV 5155//GPBD 4/ICGV 88145	F6-NURSERY-MAGIC-POP-8W:944	ICRISAT, Hyderabad, INDIA
132	ICGR 171274	Cross 1/RIL 1	ICGV 91114/GPBD 4//55-437/ICGV 88145///ICGV 6040/ICGV 5155//ICGV 00440/ICGV 00308	F6-NURSERY-MAGIC-POP-8W:1363	ICRISAT, Hyderabad, INDIA
133	ICGR 171102	Cross 3/RIL 3	ICGV 91114/ICGV 00440//ICGV 6040/ICGV 00308///55-437/GPBD 4//ICGV 5155/ICGV 88145	F6-NURSERY-MAGIC-POP-8W:492	ICRISAT, Hyderabad, INDIA
134	ICGR 171326	Cross 1/RIL 1	ICGV 91114/GPBD 4//55-437/ICGV 88145///ICGV 6040/ICGV 5155//ICGV 00440/ICGV 00308	F6-NURSERY-MAGIC-POP-8W:1658	ICRISAT, Hyderabad, INDIA
135	ICGR 171002	Cross 3/RIL 3	ICGV 91114/ICGV 00440//ICGV 6040/ICGV 00308///55-437/GPBD 4//ICGV 5155/ICGV 88145	F6-NURSERY-MAGIC-POP-8W:9	ICRISAT, Hyderabad, INDIA
136	ICGR 171385	Cross 4/RIL 4	ICGV 91114/ICGV 5155//ICGV 6040/ICGV 88145///55-437/ICGV 00440//ICGV 00308/GPBD 4	F6-NURSERY-MAGIC-POP-8W:1948	ICRISAT, Hyderabad, INDIA
137	ICGR 171447	Cross 4/RIL 4	ICGV 91114/ICGV 5155//ICGV 6040/ICGV 88145///55-437/ICGV 00440//ICGV 00308/GPBD 4	F6-NURSERY-MAGIC-POP-8W:2292	ICRISAT, Hyderabad, INDIA
138	ICGR 171595	Cross 5/RIL 5	ICGV 91114/ICGV 88145//55-437/ICGV 00308///ICGV 6040/GPBD 4//ICGV 00440/ICGV 5155	F6-NURSERY-MAGIC-POP-8W:2954	ICRISAT, Hyderabad, INDIA
139	ICGR 171553	Cross 5/RIL 5	ICGV 91114/ICGV 88145//55-437/ICGV 00308///ICGV 6040/GPBD 4//ICGV 00440/ICGV 5155	F6-NURSERY-MAGIC-POP-8W:2720	ICRISAT, Hyderabad, INDIA
140	ICGR 171398	Cross 4/RIL 4	ICGV 91114/ICGV 5155//ICGV 6040/ICGV 88145///55-437/ICGV 00440//ICGV 00308/GPBD 4	F6-NURSERY-MAGIC-POP-8W:2029	ICRISAT, Hyderabad, INDIA
141	ICGR 171571	Cross 5/RIL 5	ICGV 91114/ICGV 88145//55-437/ICGV 00308///ICGV 6040/GPBD 4//ICGV 00440/ICGV 5155	F6-NURSERY-MAGIC-POP-8W:2838	ICRISAT, Hyderabad, INDIA
142	ICGR 171496	Cross 5/RIL 5	ICGV 91114/ICGV 88145//55-437/ICGV 00308///ICGV 6040/GPBD 4//ICGV 00440/ICGV 5155	F6-NURSERY-MAGIC-POP-8W:2467	ICRISAT, Hyderabad, INDIA
143	ICGR 171327	Cross 1/RIL 1	ICGV 91114/GPBD 4//55-437/ICGV 88145///ICGV 6040/ICGV 5155//ICGV 00440/ICGV 00308	F6-NURSERY-MAGIC-POP-8W:1668	ICRISAT, Hyderabad, INDIA
144	ICGR 171132	Cross 2/RIL 2	ICGV 91114/ICGV 00308//ICGV 6040/ICGV 00440///55-437/ICGV 5155//GPBD 4/ICGV 88145	F6-NURSERY-MAGIC-POP-8W:652	ICRISAT, Hyderabad, INDIA
145	ICGR 171490	Cross 5/RIL 5	ICGV 91114/ICGV 88145//55-437/ICGV 00308///ICGV 6040/GPBD 4//ICGV 00440/ICGV 5155	F6-NURSERY-MAGIC-POP-8W:2455	ICRISAT, Hyderabad, INDIA
146	ICGR 171441	Cross 4/RIL 4	ICGV 91114/ICGV 5155//ICGV 6040/ICGV 88145///55-437/ICGV 00440//ICGV 00308/GPBD 4	F6-NURSERY-MAGIC-POP-8W:2266	ICRISAT, Hyderabad, INDIA
147	ICGR 171497	Cross 5/RIL 5	ICGV 91114/ICGV 88145//55-437/ICGV 00308///ICGV 6040/GPBD 4//ICGV 00440/ICGV 5155	F6-NURSERY-MAGIC-POP-8W:2469	ICRISAT, Hyderabad, INDIA
148	ICGR 171590	Cross 5/RIL 5	ICGV 91114/ICGV 88145//55-437/ICGV 00308///ICGV 6040/GPBD 4//ICGV 00440/ICGV 5155	F6-NURSERY-MAGIC-POP-8W:2929	ICRISAT, Hyderabad, INDIA
149	ICGR 171131	Cross 2/RIL 2	ICGV 91114/ICGV 00308//ICGV 6040/ICGV 00440///55-437/ICGV 5155//GPBD 4/ICGV 88145	F6-NURSERY-MAGIC-POP-8W:651	ICRISAT, Hyderabad, INDIA
150	ICGR 171410	Cross 4/RIL 4	ICGV 91114/ICGV 5155//ICGV 6040/ICGV 88145///55-437/ICGV 00440//ICGV 00308/GPBD 4	F6-NURSERY-MAGIC-POP-8W:2088	ICRISAT, Hyderabad, INDIA
151	ICGR 171592	Cross 5/RIL 5	ICGV 91114/ICGV 88145//55-437/ICGV 00308///ICGV 6040/GPBD 4//ICGV 00440/ICGV 5155	F6-NURSERY-MAGIC-POP-8W:2940	ICRISAT, Hyderabad, INDIA
152	ICGR 171451	Cross 4/RIL 4	ICGV 91114/ICGV 5155//ICGV 6040/ICGV 88145///55-437/ICGV 00440//ICGV 00308/GPBD 4	F6-NURSERY-MAGIC-POP-8W:2308	ICRISAT, Hyderabad, INDIA
153	ICGR 171161	Cross 2/RIL 2	ICGV 91114/ICGV 00308//ICGV 6040/ICGV 00440///55-437/ICGV 5155//GPBD 4/ICGV 88145	F6-NURSERY-MAGIC-POP-8W:854	ICRISAT, Hyderabad, INDIA
154	ICGR 171074	Cross 3/RIL 3	ICGV 91114/ICGV 00440//ICGV 6040/ICGV 00308///55-437/GPBD 4//ICGV 5155/ICGV 88145	F6-NURSERY-MAGIC-POP-8W:372	ICRISAT, Hyderabad, INDIA
155	ICGR 171122	Cross 2/RIL 2	ICGV 91114/ICGV 00308//ICGV 6040/ICGV 00440///55-437/ICGV 5155//GPBD 4/ICGV 88145	F6-NURSERY-MAGIC-POP-8W:611	ICRISAT, Hyderabad, INDIA
156	ICGR 171244	Cross 1/RIL 1	ICGV 91114/GPBD 4//55-437/ICGV 88145///ICGV 6040/ICGV 5155//ICGV 00440/ICGV 00308	F6-NURSERY-MAGIC-POP-8W:1218	ICRISAT, Hyderabad, INDIA
157	ICGR 171072	Cross 3/RIL 3	ICGV 91114/ICGV 00440//ICGV 6040/ICGV 00308///55-437/GPBD 4//ICGV 5155/ICGV 88145	F6-NURSERY-MAGIC-POP-8W:354	ICRISAT, Hyderabad, INDIA
158	ICGR 171258	Cross 1/RIL 1	ICGV 91114/GPBD 4//55-437/ICGV 88145///ICGV 6040/ICGV 5155//ICGV 00440/ICGV 00308	F6-NURSERY-MAGIC-POP-8W:1267	ICRISAT, Hyderabad, INDIA
159	ICGR 171103	Cross 3/RIL 3	ICGV 91114/ICGV 00440//ICGV 6040/ICGV 00308///55-437/GPBD 4//ICGV 5155/ICGV 88145	F6-NURSERY-MAGIC-POP-8W:496	ICRISAT, Hyderabad, INDIA
160	ICGR 171268	Cross 1/RIL 1	ICGV 91114/GPBD 4//55-437/ICGV 88145///ICGV 6040/ICGV 5155//ICGV 00440/ICGV 00308	F6-NURSERY-MAGIC-POP-8W:1331	ICRISAT, Hyderabad, INDIA
161	ICGR 171523	Cross 5/RIL 5	ICGV 91114/ICGV 88145//55-437/ICGV 00308///ICGV 6040/GPBD 4//ICGV 00440/ICGV 5155	F6-NURSERY-MAGIC-POP-8W:2606	ICRISAT, Hyderabad, INDIA
162	ICGR 171564	Cross 5/RIL 5	ICGV 91114/ICGV 88145//55-437/ICGV 00308///ICGV 6040/GPBD 4//ICGV 00440/ICGV 5155	F6-NURSERY-MAGIC-POP-8W:2792	ICRISAT, Hyderabad, INDIA
163	ICGR 171505	Cross 5/RIL 5	ICGV 91114/ICGV 88145//55-437/ICGV 00308///ICGV 6040/GPBD 4//ICGV 00440/ICGV 5155	F6-NURSERY-MAGIC-POP-8W:2499	ICRISAT, Hyderabad, INDIA
164	ICGR 171262	Cross 1/RIL 1	ICGV 91114/GPBD 4//55-437/ICGV 88145///ICGV 6040/ICGV 5155//ICGV 00440/ICGV 00308	F6-NURSERY-MAGIC-POP-8W:1296	ICRISAT, Hyderabad, INDIA
165	ICGR 171298	Cross 1/RIL 1	ICGV 91114/GPBD 4//55-437/ICGV 88145///ICGV 6040/ICGV 5155//ICGV 00440/ICGV 00308	F6-NURSERY-MAGIC-POP-8W:1505	ICRISAT, Hyderabad, INDIA
166	ICGR 171272	Cross 1/RIL 1	ICGV 91114/GPBD 4//55-437/ICGV 88145///ICGV 6040/ICGV 5155//ICGV 00440/ICGV 00308	F6-NURSERY-MAGIC-POP-8W:1347	ICRISAT, Hyderabad, INDIA
167	ICGR 171177	Cross 2/RIL 2	ICGV 91114/ICGV 00308//ICGV 6040/ICGV 00440///55-437/ICGV 5155//GPBD 4/ICGV 88145	F6-NURSERY-MAGIC-POP-8W:933	ICRISAT, Hyderabad, INDIA
168	ICGR 171341	Cross 1/RIL 1	ICGV 91114/GPBD 4//55-437/ICGV 88145///ICGV 6040/ICGV 5155//ICGV 00440/ICGV 00308	F6-NURSERY-MAGIC-POP-8W:1726	ICRISAT, Hyderabad, INDIA
169	ICGR 171021	Cross 3/RIL 3	ICGV 91114/ICGV 00440//ICGV 6040/ICGV 00308///55-437/GPBD 4//ICGV 5155/ICGV 88145	F6-NURSERY-MAGIC-POP-8W:85	ICRISAT, Hyderabad, INDIA
170	ICGR 171477	Cross 4/RIL 4	ICGV 91114/ICGV 5155//ICGV 6040/ICGV 88145///55-437/ICGV 00440//ICGV 00308/GPBD 4	F6-NURSERY-MAGIC-POP-8W:2388	ICRISAT, Hyderabad, INDIA
171	ICGR 171279	Cross 1/RIL 1	ICGV 91114/GPBD 4//55-437/ICGV 88145///ICGV 6040/ICGV 5155//ICGV 00440/ICGV 00308	F6-NURSERY-MAGIC-POP-8W:1393	ICRISAT, Hyderabad, INDIA
172	ICGR 171488	Cross 5/RIL 5	ICGV 91114/ICGV 88145//55-437/ICGV 00308///ICGV 6040/GPBD 4//ICGV 00440/ICGV 5155	F6-NURSERY-MAGIC-POP-8W:2453	ICRISAT, Hyderabad, INDIA
173	ICGR 171169	Cross 2/RIL 2	ICGV 91114/ICGV 00308//ICGV 6040/ICGV 00440///55-437/ICGV 5155//GPBD 4/ICGV 88145	F6-NURSERY-MAGIC-POP-8W:891	ICRISAT, Hyderabad, INDIA
174	ICGR 171094	Cross 3/RIL 3	ICGV 91114/ICGV 00440//ICGV 6040/ICGV 00308///55-437/GPBD 4//ICGV 5155/ICGV 88145	F6-NURSERY-MAGIC-POP-8W:459	ICRISAT, Hyderabad, INDIA
175	ICGR 171596	Cross 5/RIL 5	ICGV 91114/ICGV 88145//55-437/ICGV 00308///ICGV 6040/GPBD 4//ICGV 00440/ICGV 5155	F6-NURSERY-MAGIC-POP-8W:2958	ICRISAT, Hyderabad, INDIA
176	ICGR 171482	Cross 5/RIL 5	ICGV 91114/ICGV 88145//55-437/ICGV 00308///ICGV 6040/GPBD 4//ICGV 00440/ICGV 5155	F6-NURSERY-MAGIC-POP-8W:2410	ICRISAT, Hyderabad, INDIA
177	ICGR 171028	Cross 3/RIL 3	ICGV 91114/ICGV 00440//ICGV 6040/ICGV 00308///55-437/GPBD 4//ICGV 5155/ICGV 88145	F6-NURSERY-MAGIC-POP-8W:116	ICRISAT, Hyderabad, INDIA
178	ICGR 171324	Cross 1/RIL 1	ICGV 91114/GPBD 4//55-437/ICGV 88145///ICGV 6040/ICGV 5155//ICGV 00440/ICGV 00308	F6-NURSERY-MAGIC-POP-8W:1639	ICRISAT, Hyderabad, INDIA
179	ICGR 171027	Cross 3/RIL 3	ICGV 91114/ICGV 00440//ICGV 6040/ICGV 00308///55-437/GPBD 4//ICGV 5155/ICGV 88145	F6-NURSERY-MAGIC-POP-8W:107	ICRISAT, Hyderabad, INDIA
180	ICGR 171015	Cross 3/RIL 3	ICGV 91114/ICGV 00440//ICGV 6040/ICGV 00308///55-437/GPBD 4//ICGV 5155/ICGV 88145	F6-NURSERY-MAGIC-POP-8W:58	ICRISAT, Hyderabad, INDIA
181	ICGR 171207	Cross 2/RIL 2	ICGV 91114/ICGV 00308//ICGV 6040/ICGV 00440///55-437/ICGV 5155//GPBD 4/ICGV 88145	F6-NURSERY-MAGIC-POP-8W:1091	ICRISAT, Hyderabad, INDIA
182	ICGR 171265	Cross 1/RIL 1	ICGV 91114/GPBD 4//55-437/ICGV 88145///ICGV 6040/ICGV 5155//ICGV 00440/ICGV 00308	F6-NURSERY-MAGIC-POP-8W:1320	ICRISAT, Hyderabad, INDIA
183	ICGR 171435	Cross 4/RIL 4	ICGV 91114/ICGV 5155//ICGV 6040/ICGV 88145///55-437/ICGV 00440//ICGV 00308/GPBD 4	F6-NURSERY-MAGIC-POP-8W:2244	ICRISAT, Hyderabad, INDIA
184	ICGR 171322	Cross 1/RIL 1	ICGV 91114/GPBD 4//55-437/ICGV 88145///ICGV 6040/ICGV 5155//ICGV 00440/ICGV 00308	F6-NURSERY-MAGIC-POP-8W:1637	ICRISAT, Hyderabad, INDIA
185	ICGR 171077	Cross 3/RIL 3	ICGV 91114/ICGV 00440//ICGV 6040/ICGV 00308///55-437/GPBD 4//ICGV 5155/ICGV 88145	F6-NURSERY-MAGIC-POP-8W:385	ICRISAT, Hyderabad, INDIA
186	ICGR 171024	Cross 3/RIL 3	ICGV 91114/ICGV 00440//ICGV 6040/ICGV 00308///55-437/GPBD 4//ICGV 5155/ICGV 88145	F6-NURSERY-MAGIC-POP-8W:95	ICRISAT, Hyderabad, INDIA
187	ICGR 171475	Cross 4/RIL 4	ICGV 91114/ICGV 5155//ICGV 6040/ICGV 88145///55-437/ICGV 00440//ICGV 00308/GPBD 4	F6-NURSERY-MAGIC-POP-8W:2374	ICRISAT, Hyderabad, INDIA
188	ICGR 171158	Cross 2/RIL 2	ICGV 91114/ICGV 00308//ICGV 6040/ICGV 00440///55-437/ICGV 5155//GPBD 4/ICGV 88145	F6-NURSERY-MAGIC-POP-8W:841	ICRISAT, Hyderabad, INDIA
189	ICGR 171581	Cross 5/RIL 5	ICGV 91114/ICGV 88145//55-437/ICGV 00308///ICGV 6040/GPBD 4//ICGV 00440/ICGV 5155	F6-NURSERY-MAGIC-POP-8W:2896	ICRISAT, Hyderabad, INDIA
190	ICGR 171233	Cross 2/RIL 2	ICGV 91114/ICGV 00308//ICGV 6040/ICGV 00440///55-437/ICGV 5155//GPBD 4/ICGV 88145	F6-NURSERY-MAGIC-POP-8W:1180	ICRISAT, Hyderabad, INDIA
191	ICGR 171315	Cross 1/RIL 1	ICGV 91114/GPBD 4//55-437/ICGV 88145///ICGV 6040/ICGV 5155//ICGV 00440/ICGV 00308	F6-NURSERY-MAGIC-POP-8W:1603	ICRISAT, Hyderabad, INDIA
192	ICGR 171524	Cross 5/RIL 5	ICGV 91114/ICGV 88145//55-437/ICGV 00308///ICGV 6040/GPBD 4//ICGV 00440/ICGV 5155	F6-NURSERY-MAGIC-POP-8W:2611	ICRISAT, Hyderabad, INDIA
193	ICGR 171329	Cross 1/RIL 1	ICGV 91114/GPBD 4//55-437/ICGV 88145///ICGV 6040/ICGV 5155//ICGV 00440/ICGV 00308	F6-NURSERY-MAGIC-POP-8W:1679	ICRISAT, Hyderabad, INDIA
194	ICGR 171361	Cross 4/RIL 4	ICGV 91114/ICGV 5155//ICGV 6040/ICGV 88145///55-437/ICGV 00440//ICGV 00308/GPBD 4	F6-NURSERY-MAGIC-POP-8W:1801	ICRISAT, Hyderabad, INDIA
195	ICGR 171518	Cross 5/RIL 5	ICGV 91114/ICGV 88145//55-437/ICGV 00308///ICGV 6040/GPBD 4//ICGV 00440/ICGV 5155	F6-NURSERY-MAGIC-POP-8W:2572	ICRISAT, Hyderabad, INDIA
196	ICGR 171278	Cross 1/RIL 1	ICGV 91114/GPBD 4//55-437/ICGV 88145///ICGV 6040/ICGV 5155//ICGV 00440/ICGV 00308	F6-NURSERY-MAGIC-POP-8W:1379	ICRISAT, Hyderabad, INDIA
197	ICGR 171449	Cross 4/RIL 4	ICGV 91114/ICGV 5155//ICGV 6040/ICGV 88145///55-437/ICGV 00440//ICGV 00308/GPBD 4	F6-NURSERY-MAGIC-POP-8W:2299	ICRISAT, Hyderabad, INDIA
198	ICGR 171584	Cross 5/RIL 5	ICGV 91114/ICGV 88145//55-437/ICGV 00308///ICGV 6040/GPBD 4//ICGV 00440/ICGV 5155	F6-NURSERY-MAGIC-POP-8W:2903	ICRISAT, Hyderabad, INDIA
199	ICGR 171320	Cross 1/RIL 1	ICGV 91114/GPBD 4//55-437/ICGV 88145///ICGV 6040/ICGV 5155//ICGV 00440/ICGV 00308	F6-NURSERY-MAGIC-POP-8W:1630	ICRISAT, Hyderabad, INDIA
200	ICGR 171181	Cross 2/RIL 2	ICGV 91114/ICGV 00308//ICGV 6040/ICGV 00440///55-437/ICGV 5155//GPBD 4/ICGV 88145	F6-NURSERY-MAGIC-POP-8W:955	ICRISAT, Hyderabad, INDIA
201	ICGR 171160	Cross 2/RIL 2	ICGV 91114/ICGV 00308//ICGV 6040/ICGV 00440///55-437/ICGV 5155//GPBD 4/ICGV 88145	F6-NURSERY-MAGIC-POP-8W:853	ICRISAT, Hyderabad, INDIA
202	ICGR 171055	Cross 3/RIL 3	ICGV 91114/ICGV 00440//ICGV 6040/ICGV 00308///55-437/GPBD 4//ICGV 5155/ICGV 88145	F6-NURSERY-MAGIC-POP-8W:285	ICRISAT, Hyderabad, INDIA
203	ICGR 171347	Cross 1/RIL 1	ICGV 91114/GPBD 4//55-437/ICGV 88145///ICGV 6040/ICGV 5155//ICGV 00440/ICGV 00308	F6-NURSERY-MAGIC-POP-8W:1747	ICRISAT, Hyderabad, INDIA
204	ICGR 171560	Cross 5/RIL 5	ICGV 91114/ICGV 88145//55-437/ICGV 00308///ICGV 6040/GPBD 4//ICGV 00440/ICGV 5155	F6-NURSERY-MAGIC-POP-8W:2771	ICRISAT, Hyderabad, INDIA
205	ICGR 171163	Cross 2/RIL 2	ICGV 91114/ICGV 00308//ICGV 6040/ICGV 00440///55-437/ICGV 5155//GPBD 4/ICGV 88145	F6-NURSERY-MAGIC-POP-8W:870	ICRISAT, Hyderabad, INDIA
206	ICGR 171561	Cross 5/RIL 5	ICGV 91114/ICGV 88145//55-437/ICGV 00308///ICGV 6040/GPBD 4//ICGV 00440/ICGV 5155	F6-NURSERY-MAGIC-POP-8W:2772	ICRISAT, Hyderabad, INDIA
207	ICGR 171075	Cross 3/RIL 3	ICGV 91114/ICGV 00440//ICGV 6040/ICGV 00308///55-437/GPBD 4//ICGV 5155/ICGV 88145	F6-NURSERY-MAGIC-POP-8W:380	ICRISAT, Hyderabad, INDIA
208	ICGR 171240	Cross 2/RIL 2	ICGV 91114/ICGV 00308//ICGV 6040/ICGV 00440///55-437/ICGV 5155//GPBD 4/ICGV 88145	F6-NURSERY-MAGIC-POP-8W:1194	ICRISAT, Hyderabad, INDIA
209	ICGR 171534	Cross 5/RIL 5	ICGV 91114/ICGV 88145//55-437/ICGV 00308///ICGV 6040/GPBD 4//ICGV 00440/ICGV 5155	F6-NURSERY-MAGIC-POP-8W:2648	ICRISAT, Hyderabad, INDIA
210	ICGR 171185	Cross 2/RIL 2	ICGV 91114/ICGV 00308//ICGV 6040/ICGV 00440///55-437/ICGV 5155//GPBD 4/ICGV 88145	F6-NURSERY-MAGIC-POP-8W:962	ICRISAT, Hyderabad, INDIA
211	ICGR 171470	Cross 4/RIL 4	ICGV 91114/ICGV 5155//ICGV 6040/ICGV 88145///55-437/ICGV 00440//ICGV 00308/GPBD 4	F6-NURSERY-MAGIC-POP-8W:2359	ICRISAT, Hyderabad, INDIA
212	ICGR 171352	Cross 1/RIL 1	ICGV 91114/GPBD 4//55-437/ICGV 88145///ICGV 6040/ICGV 5155//ICGV 00440/ICGV 00308	F6-NURSERY-MAGIC-POP-8W:1769	ICRISAT, Hyderabad, INDIA
213	ICGR 171157	Cross 2/RIL 2	ICGV 91114/ICGV 00308//ICGV 6040/ICGV 00440///55-437/ICGV 5155//GPBD 4/ICGV 88145	F6-NURSERY-MAGIC-POP-8W:839	ICRISAT, Hyderabad, INDIA
214	ICGR 171061	Cross 3/RIL 3	ICGV 91114/ICGV 00440//ICGV 6040/ICGV 00308///55-437/GPBD 4//ICGV 5155/ICGV 88145	F6-NURSERY-MAGIC-POP-8W:300	ICRISAT, Hyderabad, INDIA
215	ICGR 171010	Cross 3/RIL 3	ICGV 91114/ICGV 00440//ICGV 6040/ICGV 00308///55-437/GPBD 4//ICGV 5155/ICGV 88145	F6-NURSERY-MAGIC-POP-8W:41	ICRISAT, Hyderabad, INDIA
216	ICGR 171579	Cross 5/RIL 5	ICGV 91114/ICGV 88145//55-437/ICGV 00308///ICGV 6040/GPBD 4//ICGV 00440/ICGV 5155	F6-NURSERY-MAGIC-POP-8W:2889	ICRISAT, Hyderabad, INDIA
217	ICGR 171468	Cross 4/RIL 4	ICGV 91114/ICGV 5155//ICGV 6040/ICGV 88145///55-437/ICGV 00440//ICGV 00308/GPBD 4	F6-NURSERY-MAGIC-POP-8W:2354	ICRISAT, Hyderabad, INDIA
218	ICGR 171145	Cross 2/RIL 2	ICGV 91114/ICGV 00308//ICGV 6040/ICGV 00440///55-437/ICGV 5155//GPBD 4/ICGV 88145	F6-NURSERY-MAGIC-POP-8W:723	ICRISAT, Hyderabad, INDIA
219	ICGR 171135	Cross 2/RIL 2	ICGV 91114/ICGV 00308//ICGV 6040/ICGV 00440///55-437/ICGV 5155//GPBD 4/ICGV 88145	F6-NURSERY-MAGIC-POP-8W:666	ICRISAT, Hyderabad, INDIA
220	ICGR 171306	Cross 1/RIL 1	ICGV 91114/GPBD 4//55-437/ICGV 88145///ICGV 6040/ICGV 5155//ICGV 00440/ICGV 00308	F6-NURSERY-MAGIC-POP-8W:1563	ICRISAT, Hyderabad, INDIA
221	ICGR 171330	Cross 1/RIL 1	ICGV 91114/GPBD 4//55-437/ICGV 88145///ICGV 6040/ICGV 5155//ICGV 00440/ICGV 00308	F6-NURSERY-MAGIC-POP-8W:1682	ICRISAT, Hyderabad, INDIA
222	ICGR 171368	Cross 4/RIL 4	ICGV 91114/ICGV 5155//ICGV 6040/ICGV 88145///55-437/ICGV 00440//ICGV 00308/GPBD 4	F6-NURSERY-MAGIC-POP-8W:1851	ICRISAT, Hyderabad, INDIA
223	ICGR 171444	Cross 4/RIL 4	ICGV 91114/ICGV 5155//ICGV 6040/ICGV 88145///55-437/ICGV 00440//ICGV 00308/GPBD 4	F6-NURSERY-MAGIC-POP-8W:2285	ICRISAT, Hyderabad, INDIA
224	ICGR 171251	Cross 1/RIL 1	ICGV 91114/GPBD 4//55-437/ICGV 88145///ICGV 6040/ICGV 5155//ICGV 00440/ICGV 00308	F6-NURSERY-MAGIC-POP-8W:1252	ICRISAT, Hyderabad, INDIA
225	ICGR 171188	Cross 2/RIL 2	ICGV 91114/ICGV 00308//ICGV 6040/ICGV 00440///55-437/ICGV 5155//GPBD 4/ICGV 88145	F6-NURSERY-MAGIC-POP-8W:988	ICRISAT, Hyderabad, INDIA
226	ICGR 171093	Cross 3/RIL 3	ICGV 91114/ICGV 00440//ICGV 6040/ICGV 00308///55-437/GPBD 4//ICGV 5155/ICGV 88145	F6-NURSERY-MAGIC-POP-8W:454	ICRISAT, Hyderabad, INDIA
227	ICGR 171053	Cross 3/RIL 3	ICGV 91114/ICGV 00440//ICGV 6040/ICGV 00308///55-437/GPBD 4//ICGV 5155/ICGV 88145	F6-NURSERY-MAGIC-POP-8W:273	ICRISAT, Hyderabad, INDIA
228	ICGR 171465	Cross 4/RIL 4	ICGV 91114/ICGV 5155//ICGV 6040/ICGV 88145///55-437/ICGV 00440//ICGV 00308/GPBD 4	F6-NURSERY-MAGIC-POP-8W:2347	ICRISAT, Hyderabad, INDIA
229	ICGR 171008	Cross 3/RIL 3	ICGV 91114/ICGV 00440//ICGV 6040/ICGV 00308///55-437/GPBD 4//ICGV 5155/ICGV 88145	F6-NURSERY-MAGIC-POP-8W:39	ICRISAT, Hyderabad, INDIA
230	ICGR 171427	Cross 4/RIL 4	ICGV 91114/ICGV 5155//ICGV 6040/ICGV 88145///55-437/ICGV 00440//ICGV 00308/GPBD 4	F6-NURSERY-MAGIC-POP-8W:2185	ICRISAT, Hyderabad, INDIA
231	ICGR 171377	Cross 4/RIL 4	ICGV 91114/ICGV 5155//ICGV 6040/ICGV 88145///55-437/ICGV 00440//ICGV 00308/GPBD 4	F6-NURSERY-MAGIC-POP-8W:1887	ICRISAT, Hyderabad, INDIA
232	ICGR 171142	Cross 2/RIL 2	ICGV 91114/ICGV 00308//ICGV 6040/ICGV 00440///55-437/ICGV 5155//GPBD 4/ICGV 88145	F6-NURSERY-MAGIC-POP-8W:708	ICRISAT, Hyderabad, INDIA
233	ICGR 171044	Cross 3/RIL 3	ICGV 91114/ICGV 00440//ICGV 6040/ICGV 00308///55-437/GPBD 4//ICGV 5155/ICGV 88145	F6-NURSERY-MAGIC-POP-8W:212	ICRISAT, Hyderabad, INDIA
234	ICGR 171254	Cross 1/RIL 1	ICGV 91114/GPBD 4//55-437/ICGV 88145///ICGV 6040/ICGV 5155//ICGV 00440/ICGV 00308	F6-NURSERY-MAGIC-POP-8W:1260	ICRISAT, Hyderabad, INDIA
235	ICGR 171473	Cross 4/RIL 4	ICGV 91114/ICGV 5155//ICGV 6040/ICGV 88145///55-437/ICGV 00440//ICGV 00308/GPBD 4	F6-NURSERY-MAGIC-POP-8W:2370	ICRISAT, Hyderabad, INDIA
236	ICGR 171401	Cross 4/RIL 4	ICGV 91114/ICGV 5155//ICGV 6040/ICGV 88145///55-437/ICGV 00440//ICGV 00308/GPBD 4	F6-NURSERY-MAGIC-POP-8W:2046	ICRISAT, Hyderabad, INDIA
237	ICGR 171088	Cross 3/RIL 3	ICGV 91114/ICGV 00440//ICGV 6040/ICGV 00308///55-437/GPBD 4//ICGV 5155/ICGV 88145	F6-NURSERY-MAGIC-POP-8W:437	ICRISAT, Hyderabad, INDIA
238	ICGR 171325	Cross 1/RIL 1	ICGV 91114/GPBD 4//55-437/ICGV 88145///ICGV 6040/ICGV 5155//ICGV 00440/ICGV 00308	F6-NURSERY-MAGIC-POP-8W:1650	ICRISAT, Hyderabad, INDIA
239	ICGR 171472	Cross 4/RIL 4	ICGV 91114/ICGV 5155//ICGV 6040/ICGV 88145///55-437/ICGV 00440//ICGV 00308/GPBD 4	F6-NURSERY-MAGIC-POP-8W:2368	ICRISAT, Hyderabad, INDIA
240	ICGR 171501	Cross 5/RIL 5	ICGV 91114/ICGV 88145//55-437/ICGV 00308///ICGV 6040/GPBD 4//ICGV 00440/ICGV 5155	F6-NURSERY-MAGIC-POP-8W:2489	ICRISAT, Hyderabad, INDIA
241	ICGR 171304	Cross 1/RIL 1	ICGV 91114/GPBD 4//55-437/ICGV 88145///ICGV 6040/ICGV 5155//ICGV 00440/ICGV 00308	F6-NURSERY-MAGIC-POP-8W:1557	ICRISAT, Hyderabad, INDIA
242	ICGR 171059	Cross 3/RIL 3	ICGV 91114/ICGV 00440//ICGV 6040/ICGV 00308///55-437/GPBD 4//ICGV 5155/ICGV 88145	F6-NURSERY-MAGIC-POP-8W:297	ICRISAT, Hyderabad, INDIA
243	ICGR 171200	Cross 2/RIL 2	ICGV 91114/ICGV 00308//ICGV 6040/ICGV 00440///55-437/ICGV 5155//GPBD 4/ICGV 88145	F6-NURSERY-MAGIC-POP-8W:1050	ICRISAT, Hyderabad, INDIA
244	ICGR 171459	Cross 4/RIL 4	ICGV 91114/ICGV 5155//ICGV 6040/ICGV 88145///55-437/ICGV 00440//ICGV 00308/GPBD 4	F6-NURSERY-MAGIC-POP-8W:2334	ICRISAT, Hyderabad, INDIA
245	GG 20	Check	GAUG-10 × R-33–1	JAU, Gujrat
246	ICGR 171408	Cross 4/RIL 4	ICGV 91114/ICGV 5155//ICGV 6040/ICGV 88145///55-437/ICGV 00440//ICGV 00308/GPBD 4	F6-NURSERY-MAGIC-POP-8W:2077	ICRISAT, Hyderabad, INDIA
247	ICGR 171575	Cross 5/RIL 5	ICGV 91114/ICGV 88145//55-437/ICGV 00308///ICGV 6040/GPBD 4//ICGV 00440/ICGV 5155	F6-NURSERY-MAGIC-POP-8W:2882	ICRISAT, Hyderabad, INDIA
248	ICGR 171051	Cross 3/RIL 3	ICGV 91114/ICGV 00440//ICGV 6040/ICGV 00308///55-437/GPBD 4//ICGV 5155/ICGV 88145	F6-NURSERY-MAGIC-POP-8W:260	ICRISAT, Hyderabad, INDIA
249	ICGV06040	Parent	(ICGV 92069 × ICGV 93184) × (NC Ac 343 × ICGV 86187)	ICRISAT	ICRISAT, Hyderabad, INDIA
250	ICGR 171599	Cross 5/RIL 5	ICGV 91114/ICGV 88145//55-437/ICGV 00308///ICGV 6040/GPBD 4//ICGV 00440/ICGV 5155	F6-NURSERY-MAGIC-POP-8W:2981	ICRISAT, Hyderabad, INDIA
251	ICGR 171143	Cross 2/RIL 2	ICGV 91114/ICGV 00308//ICGV 6040/ICGV 00440///55-437/ICGV 5155//GPBD 4/ICGV 88145	F6-NURSERY-MAGIC-POP-8W:710	ICRISAT, Hyderabad, INDIA
252	ICGR 171227	Cross 2/RIL 2	ICGV 91114/ICGV 00308//ICGV 6040/ICGV 00440///55-437/ICGV 5155//GPBD 4/ICGV 88145	F6-NURSERY-MAGIC-POP-8W:1156	ICRISAT, Hyderabad, INDIA
253	ICGR 171538	Cross 5/RIL 5	ICGV 91114/ICGV 88145//55-437/ICGV 00308///ICGV 6040/GPBD 4//ICGV 00440/ICGV 5155	F6-NURSERY-MAGIC-POP-8W:2662	ICRISAT, Hyderabad, INDIA
254	ICGR 171539	Cross 5/RIL 5	ICGV 91114/ICGV 88145//55-437/ICGV 00308///ICGV 6040/GPBD 4//ICGV 00440/ICGV 5155	F6-NURSERY-MAGIC-POP-8W:2663	ICRISAT, Hyderabad, INDIA
255	ICGR 171127	Cross 2/RIL 2	ICGV 91114/ICGV 00308//ICGV 6040/ICGV 00440///55-437/ICGV 5155//GPBD 4/ICGV 88145	F6-NURSERY-MAGIC-POP-8W:629	ICRISAT, Hyderabad, INDIA
256	ICGR 171504	Cross 5/RIL 5	ICGV 91114/ICGV 88145//55-437/ICGV 00308///ICGV 6040/GPBD 4//ICGV 00440/ICGV 5155	F6-NURSERY-MAGIC-POP-8W:2497	ICRISAT, Hyderabad, INDIA
257	ICGR 171328	Cross 1/RIL 1	ICGV 91114/GPBD 4//55-437/ICGV 88145///ICGV 6040/ICGV 5155//ICGV 00440/ICGV 00308	F6-NURSERY-MAGIC-POP-8W:1673	ICRISAT, Hyderabad, INDIA
258	ICGR 171434	Cross 4/RIL 4	ICGV 91114/ICGV 5155//ICGV 6040/ICGV 88145///55-437/ICGV 00440//ICGV 00308/GPBD 4	F6-NURSERY-MAGIC-POP-8W:2226	ICRISAT, Hyderabad, INDIA
259	ICGR 171301	Cross 1/RIL 1	ICGV 91114/GPBD 4//55-437/ICGV 88145///ICGV 6040/ICGV 5155//ICGV 00440/ICGV 00308	F6-NURSERY-MAGIC-POP-8W:1519	ICRISAT, Hyderabad, INDIA
260	ICGR 171453	Cross 4/RIL 4	ICGV 91114/ICGV 5155//ICGV 6040/ICGV 88145///55-437/ICGV 00440//ICGV 00308/GPBD 4	F6-NURSERY-MAGIC-POP-8W:2315	ICRISAT, Hyderabad, INDIA
261	ICGR 171480	Cross 4/RIL 4	ICGV 91114/ICGV 5155//ICGV 6040/ICGV 88145///55-437/ICGV 00440//ICGV 00308/GPBD 4	F6-NURSERY-MAGIC-POP-8W:2393	ICRISAT, Hyderabad, INDIA
262	ICGR 171095	Cross 3/RIL 3	ICGV 91114/ICGV 00440//ICGV 6040/ICGV 00308///55-437/GPBD 4//ICGV 5155/ICGV 88145	F6-NURSERY-MAGIC-POP-8W:463	ICRISAT, Hyderabad, INDIA
263	ICGR 171515	Cross 5/RIL 5	ICGV 91114/ICGV 88145//55-437/ICGV 00308///ICGV 6040/GPBD 4//ICGV 00440/ICGV 5155	F6-NURSERY-MAGIC-POP-8W:2558	ICRISAT, Hyderabad, INDIA
264	ICGR 171217	Cross 2/RIL 2	ICGV 91114/ICGV 00308//ICGV 6040/ICGV 00440///55-437/ICGV 5155//GPBD 4/ICGV 88145	F6-NURSERY-MAGIC-POP-8W:1136	ICRISAT, Hyderabad, INDIA
265	ICGR 171403	Cross 4/RIL 4	ICGV 91114/ICGV 5155//ICGV 6040/ICGV 88145///55-437/ICGV 00440//ICGV 00308/GPBD 4	F6-NURSERY-MAGIC-POP-8W:2063	ICRISAT, Hyderabad, INDIA
266	ICGR 171380	Cross 4/RIL 4	ICGV 91114/ICGV 5155//ICGV 6040/ICGV 88145///55-437/ICGV 00440//ICGV 00308/GPBD 4	F6-NURSERY-MAGIC-POP-8W:1897	ICRISAT, Hyderabad, INDIA
267	ICGR 171395	Cross 4/RIL 4	ICGV 91114/ICGV 5155//ICGV 6040/ICGV 88145///55-437/ICGV 00440//ICGV 00308/GPBD 4	F6-NURSERY-MAGIC-POP-8W:2001	ICRISAT, Hyderabad, INDIA
268	ICGR 171249	Cross 1/RIL 1	ICGV 91114/GPBD 4//55-437/ICGV 88145///ICGV 6040/ICGV 5155//ICGV 00440/ICGV 00308	F6-NURSERY-MAGIC-POP-8W:1243	ICRISAT, Hyderabad, INDIA
269	ICGR 171348	Cross 1/RIL 1	ICGV 91114/GPBD 4//55-437/ICGV 88145///ICGV 6040/ICGV 5155//ICGV 00440/ICGV 00308	F6-NURSERY-MAGIC-POP-8W:1751	ICRISAT, Hyderabad, INDIA
270	ICGR 171261	Cross 1/RIL 1	ICGV 91114/GPBD 4//55-437/ICGV 88145///ICGV 6040/ICGV 5155//ICGV 00440/ICGV 00308	F6-NURSERY-MAGIC-POP-8W:1290	ICRISAT, Hyderabad, INDIA
271	ICGR 171478	Cross 4/RIL 4	ICGV 91114/ICGV 5155//ICGV 6040/ICGV 88145///55-437/ICGV 00440//ICGV 00308/GPBD 4	F6-NURSERY-MAGIC-POP-8W:2389	ICRISAT, Hyderabad, INDIA
272	ICGR 171011	Cross 3/RIL 3	ICGV 91114/ICGV 00440//ICGV 6040/ICGV 00308///55-437/GPBD 4//ICGV 5155/ICGV 88145	F6-NURSERY-MAGIC-POP-8W:46	ICRISAT, Hyderabad, INDIA
273	ICGR 171116	Cross 3/RIL 3	ICGV 91114/ICGV 00440//ICGV 6040/ICGV 00308///55-437/GPBD 4//ICGV 5155/ICGV 88145	F6-NURSERY-MAGIC-POP-8W:573	ICRISAT, Hyderabad, INDIA
274	ICGR 171194	Cross 2/RIL 2	ICGV 91114/ICGV 00308//ICGV 6040/ICGV 00440///55-437/ICGV 5155//GPBD 4/ICGV 88145	F6-NURSERY-MAGIC-POP-8W:1017	ICRISAT, Hyderabad, INDIA
275	ICGR 171436	Cross 4/RIL 4	ICGV 91114/ICGV 5155//ICGV 6040/ICGV 88145///55-437/ICGV 00440//ICGV 00308/GPBD 4	F6-NURSERY-MAGIC-POP-8W:2245	ICRISAT, Hyderabad, INDIA
276	ICGR 171120	Cross 3/RIL 3	ICGV 91114/ICGV 00440//ICGV 6040/ICGV 00308///55-437/GPBD 4//ICGV 5155/ICGV 88145	F6-NURSERY-MAGIC-POP-8W:591	ICRISAT, Hyderabad, INDIA
277	ICGV03043	Check	ICGV 99160 × (ICGV 93124 × (Li × ICGS 44))	ICRISAT	ICRISAT, Hyderabad, INDIA
278	ICGR 171292	Cross 1/RIL 1	ICGV 91114/GPBD 4//55-437/ICGV 88145///ICGV 6040/ICGV 5155//ICGV 00440/ICGV 00308	F6-NURSERY-MAGIC-POP-8W:1484	ICRISAT, Hyderabad, INDIA
279	ICGR 171452	Cross 4/RIL 4	ICGV 91114/ICGV 5155//ICGV 6040/ICGV 88145///55-437/ICGV 00440//ICGV 00308/GPBD 4	F6-NURSERY-MAGIC-POP-8W:2314	ICRISAT, Hyderabad, INDIA
280	GPBD 4	Parent	KRG 1 × CS 16	UAS, Dharwad, India	ICRISAT, Hyderabad, INDIA
281	ICGR 171345	Cross 1/RIL 1	ICGV 91114/GPBD 4//55-437/ICGV 88145///ICGV 6040/ICGV 5155//ICGV 00440/ICGV 00308	F6-NURSERY-MAGIC-POP-8W:1739	ICRISAT, Hyderabad, INDIA
282	ICGR 171242	Cross 1/RIL 1	ICGV 91114/GPBD 4//55-437/ICGV 88145///ICGV 6040/ICGV 5155//ICGV 00440/ICGV 00308	F6-NURSERY-MAGIC-POP-8W:1213	ICRISAT, Hyderabad, INDIA
283	ICGR 171108	Cross 3/RIL 3	ICGV 91114/ICGV 00440//ICGV 6040/ICGV 00308///55-437/GPBD 4//ICGV 5155/ICGV 88145	F6-NURSERY-MAGIC-POP-8W:524	ICRISAT, Hyderabad, INDIA
284	ICGR 171290	Cross 1/RIL 1	ICGV 91114/GPBD 4//55-437/ICGV 88145///ICGV 6040/ICGV 5155//ICGV 00440/ICGV 00308	F6-NURSERY-MAGIC-POP-8W:1473	ICRISAT, Hyderabad, INDIA
285	ICGV00308	Parent	(ICGV 95244 × ICGV 96223)	ICRISAT	ICRISAT, Hyderabad, INDIA
286	ICGR 171156	Cross 2/RIL 2	ICGV 91114/ICGV 00308//ICGV 6040/ICGV 00440///55-437/ICGV 5155//GPBD 4/ICGV 88145	F6-NURSERY-MAGIC-POP-8W:833	ICRISAT, Hyderabad, INDIA
287	ICGR 171144	Cross 2/RIL 2	ICGV 91114/ICGV 00308//ICGV 6040/ICGV 00440///55-437/ICGV 5155//GPBD 4/ICGV 88145	F6-NURSERY-MAGIC-POP-8W:717	ICRISAT, Hyderabad, INDIA
288	ICGR 171396	Cross 4/RIL 4	ICGV 91114/ICGV 5155//ICGV 6040/ICGV 88145///55-437/ICGV 00440//ICGV 00308/GPBD 4	F6-NURSERY-MAGIC-POP-8W:2015	ICRISAT, Hyderabad, INDIA
289	ICGR 171312	Cross 1/RIL 1	ICGV 91114/GPBD 4//55-437/ICGV 88145///ICGV 6040/ICGV 5155//ICGV 00440/ICGV 00308	F6-NURSERY-MAGIC-POP-8W:1589	ICRISAT, Hyderabad, INDIA
290	ICGR 171360	Cross 1/RIL 1	ICGV 91114/GPBD 4//55-437/ICGV 88145///ICGV 6040/ICGV 5155//ICGV 00440/ICGV 00308	F6-NURSERY-MAGIC-POP-8W:1799	ICRISAT, Hyderabad, INDIA
291	ICGR 171133	Cross 2/RIL 2	ICGV 91114/ICGV 00308//ICGV 6040/ICGV 00440///55-437/ICGV 5155//GPBD 4/ICGV 88145	F6-NURSERY-MAGIC-POP-8W:658	ICRISAT, Hyderabad, INDIA
292	ICGR 171113	Cross 3/RIL 3	ICGV 91114/ICGV 00440//ICGV 6040/ICGV 00308///55-437/GPBD 4//ICGV 5155/ICGV 88145	F6-NURSERY-MAGIC-POP-8W:560	ICRISAT, Hyderabad, INDIA
293	ICGR 171101	Cross 3/RIL 3	ICGV 91114/ICGV 00440//ICGV 6040/ICGV 00308///55-437/GPBD 4//ICGV 5155/ICGV 88145	F6-NURSERY-MAGIC-POP-8W:485	ICRISAT, Hyderabad, INDIA
294	ICGR 171295	Cross 1/RIL 1	ICGV 91114/GPBD 4//55-437/ICGV 88145///ICGV 6040/ICGV 5155//ICGV 00440/ICGV 00308	F6-NURSERY-MAGIC-POP-8W:1500	ICRISAT, Hyderabad, INDIA
295	ICGR 171084	Cross 3/RIL 3	ICGV 91114/ICGV 00440//ICGV 6040/ICGV 00308///55-437/GPBD 4//ICGV 5155/ICGV 88145	F6-NURSERY-MAGIC-POP-8W:428	ICRISAT, Hyderabad, INDIA
296	ICGR 171241	Cross 1/RIL 1	ICGV 91114/GPBD 4//55-437/ICGV 88145///ICGV 6040/ICGV 5155//ICGV 00440/ICGV 00308	F6-NURSERY-MAGIC-POP-8W:1205	ICRISAT, Hyderabad, INDIA
297	ICGR 171394	Cross 4/RIL 4	ICGV 91114/ICGV 5155//ICGV 6040/ICGV 88145///55-437/ICGV 00440//ICGV 00308/GPBD 4	F6-NURSERY-MAGIC-POP-8W:1992	ICRISAT, Hyderabad, INDIA
298	M 335	Check	M-13 × F-7	PAU, Ludhiana, India
299	ICGR 171525	Cross 5/RIL 5	ICGV 91114/ICGV 88145//55-437/ICGV 00308///ICGV 6040/GPBD 4//ICGV 00440/ICGV 5155	F6-NURSERY-MAGIC-POP-8W:2614	ICRISAT, Hyderabad, INDIA
300	ICGR 171509	Cross 5/RIL 5	ICGV 91114/ICGV 88145//55-437/ICGV 00308///ICGV 6040/GPBD 4//ICGV 00440/ICGV 5155	F6-NURSERY-MAGIC-POP-8W:2517	ICRISAT, Hyderabad, INDIA
301	ICGR 171286	Cross 1/RIL 1	ICGV 91114/GPBD 4//55-437/ICGV 88145///ICGV 6040/ICGV 5155//ICGV 00440/ICGV 00308	F6-NURSERY-MAGIC-POP-8W:1443	ICRISAT, Hyderabad, INDIA
302	ICGR 171568	Cross 5/RIL 5	ICGV 91114/ICGV 88145//55-437/ICGV 00308///ICGV 6040/GPBD 4//ICGV 00440/ICGV 5155	F6-NURSERY-MAGIC-POP-8W:2817	ICRISAT, Hyderabad, INDIA
303	ICGR 171506	Cross 5/RIL 5	ICGV 91114/ICGV 88145//55-437/ICGV 00308///ICGV 6040/GPBD 4//ICGV 00440/ICGV 5155	F6-NURSERY-MAGIC-POP-8W:2502	ICRISAT, Hyderabad, INDIA
304	ICGR 171425	Cross 4/RIL 4	ICGV 91114/ICGV 5155//ICGV 6040/ICGV 88145///55-437/ICGV 00440//ICGV 00308/GPBD 4	F6-NURSERY-MAGIC-POP-8W:2166	ICRISAT, Hyderabad, INDIA
305	ICGR 171314	Cross 1/RIL 1	ICGV 91114/GPBD 4//55-437/ICGV 88145///ICGV 6040/ICGV 5155//ICGV 00440/ICGV 00308	F6-NURSERY-MAGIC-POP-8W:1601	ICRISAT, Hyderabad, INDIA
306	ICGR 171446	Cross 4/RIL 4	ICGV 91114/ICGV 5155//ICGV 6040/ICGV 88145///55-437/ICGV 00440//ICGV 00308/GPBD 4	F6-NURSERY-MAGIC-POP-8W:2291	ICRISAT, Hyderabad, INDIA
307	ICGR 171464	Cross 4/RIL 4	ICGV 91114/ICGV 5155//ICGV 6040/ICGV 88145///55-437/ICGV 00440//ICGV 00308/GPBD 4	F6-NURSERY-MAGIC-POP-8W:2346	ICRISAT, Hyderabad, INDIA
308	ICGR 171585	Cross 5/RIL 5	ICGV 91114/ICGV 88145//55-437/ICGV 00308///ICGV 6040/GPBD 4//ICGV 00440/ICGV 5155	F6-NURSERY-MAGIC-POP-8W:2908	ICRISAT, Hyderabad, INDIA
309	ICGR 171382	Cross 4/RIL 4	ICGV 91114/ICGV 5155//ICGV 6040/ICGV 88145///55-437/ICGV 00440//ICGV 00308/GPBD 4	F6-NURSERY-MAGIC-POP-8W:1918	ICRISAT, Hyderabad, INDIA
310	ICGR 171209	Cross 2/RIL 2	ICGV 91114/ICGV 00308//ICGV 6040/ICGV 00440///55-437/ICGV 5155//GPBD 4/ICGV 88145	F6-NURSERY-MAGIC-POP-8W:1093	ICRISAT, Hyderabad, INDIA
311	ICGR 171577	Cross 5/RIL 5	ICGV 91114/ICGV 88145//55-437/ICGV 00308///ICGV 6040/GPBD 4//ICGV 00440/ICGV 5155	F6-NURSERY-MAGIC-POP-8W:2886	ICRISAT, Hyderabad, INDIA
312	ICGR 171179	Cross 2/RIL 2	ICGV 91114/ICGV 00308//ICGV 6040/ICGV 00440///55-437/ICGV 5155//GPBD 4/ICGV 88145	F6-NURSERY-MAGIC-POP-8W:948	ICRISAT, Hyderabad, INDIA
313	ICGR 171417	Cross 4/RIL 4	ICGV 91114/ICGV 5155//ICGV 6040/ICGV 88145///55-437/ICGV 00440//ICGV 00308/GPBD 4	F6-NURSERY-MAGIC-POP-8W:2138	ICRISAT, Hyderabad, INDIA
314	ICGR 171086	Cross 3/RIL 3	ICGV 91114/ICGV 00440//ICGV 6040/ICGV 00308///55-437/GPBD 4//ICGV 5155/ICGV 88145	F6-NURSERY-MAGIC-POP-8W:433	ICRISAT, Hyderabad, INDIA
315	ICGR 171054	Cross 3/RIL 3	ICGV 91114/ICGV 00440//ICGV 6040/ICGV 00308///55-437/GPBD 4//ICGV 5155/ICGV 88145	F6-NURSERY-MAGIC-POP-8W:275	ICRISAT, Hyderabad, INDIA
316	ICGR 171423	Cross 4/RIL 4	ICGV 91114/ICGV 5155//ICGV 6040/ICGV 88145///55-437/ICGV 00440//ICGV 00308/GPBD 4	F6-NURSERY-MAGIC-POP-8W:2163	ICRISAT, Hyderabad, INDIA
317	ICGR 171349	Cross 1/RIL 1	ICGV 91114/GPBD 4//55-437/ICGV 88145///ICGV 6040/ICGV 5155//ICGV 00440/ICGV 00308	F6-NURSERY-MAGIC-POP-8W:1754	ICRISAT, Hyderabad, INDIA
318	ICGR 171065	Cross 3/RIL 3	ICGV 91114/ICGV 00440//ICGV 6040/ICGV 00308///55-437/GPBD 4//ICGV 5155/ICGV 88145	F6-NURSERY-MAGIC-POP-8W:332	ICRISAT, Hyderabad, INDIA
319	ICGV 91114	Parent	ICGV 86055 × ICGV 86533	ICRISAT	ICRISAT, Hyderabad, INDIA
320	ICGR 171228	Cross 2/RIL 2	ICGV 91114/ICGV 00308//ICGV 6040/ICGV 00440///55-437/ICGV 5155//GPBD 4/ICGV 88145	F6-NURSERY-MAGIC-POP-8W:1158	ICRISAT, Hyderabad, INDIA
321	ICGR 171060	Cross 3/RIL 3	ICGV 91114/ICGV 00440//ICGV 6040/ICGV 00308///55-437/GPBD 4//ICGV 5155/ICGV 88145	F6-NURSERY-MAGIC-POP-8W:298	ICRISAT, Hyderabad, INDIA
322	ICGR 171239	Cross 2/RIL 2	ICGV 91114/ICGV 00308//ICGV 6040/ICGV 00440///55-437/ICGV 5155//GPBD 4/ICGV 88145	F6-NURSERY-MAGIC-POP-8W:1193	ICRISAT, Hyderabad, INDIA
323	ICGR 171164	Cross 2/RIL 2	ICGV 91114/ICGV 00308//ICGV 6040/ICGV 00440///55-437/ICGV 5155//GPBD 4/ICGV 88145	F6-NURSERY-MAGIC-POP-8W:871	ICRISAT, Hyderabad, INDIA
324	ICGR 171587	Cross 5/RIL 5	ICGV 91114/ICGV 88145//55-437/ICGV 00308///ICGV 6040/GPBD 4//ICGV 00440/ICGV 5155	F6-NURSERY-MAGIC-POP-8W:2915	ICRISAT, Hyderabad, INDIA
325	ICGR 171224	Cross 2/RIL 2	ICGV 91114/ICGV 00308//ICGV 6040/ICGV 00440///55-437/ICGV 5155//GPBD 4/ICGV 88145	F6-NURSERY-MAGIC-POP-8W:1150	ICRISAT, Hyderabad, INDIA
326	ICGR 171273	Cross 1/RIL 1	ICGV 91114/GPBD 4//55-437/ICGV 88145///ICGV 6040/ICGV 5155//ICGV 00440/ICGV 00308	F6-NURSERY-MAGIC-POP-8W:1349	ICRISAT, Hyderabad, INDIA
327	ICGR 171152	Cross 2/RIL 2	ICGV 91114/ICGV 00308//ICGV 6040/ICGV 00440///55-437/ICGV 5155//GPBD 4/ICGV 88145	F6-NURSERY-MAGIC-POP-8W:806	ICRISAT, Hyderabad, INDIA
328	ICGR 171549	Cross 5/RIL 5	ICGV 91114/ICGV 88145//55-437/ICGV 00308///ICGV 6040/GPBD 4//ICGV 00440/ICGV 5155	F6-NURSERY-MAGIC-POP-8W:2712	ICRISAT, Hyderabad, INDIA
329	ICGR 171442	Cross 4/RIL 4	ICGV 91114/ICGV 5155//ICGV 6040/ICGV 88145///55-437/ICGV 00440//ICGV 00308/GPBD 4	F6-NURSERY-MAGIC-POP-8W:2270	ICRISAT, Hyderabad, INDIA
330	ICGR 171307	Cross 1/RIL 1	ICGV 91114/GPBD 4//55-437/ICGV 88145///ICGV 6040/ICGV 5155//ICGV 00440/ICGV 00308	F6-NURSERY-MAGIC-POP-8W:1569	ICRISAT, Hyderabad, INDIA
331	ICGR 171466	Cross 4/RIL 4	ICGV 91114/ICGV 5155//ICGV 6040/ICGV 88145///55-437/ICGV 00440//ICGV 00308/GPBD 4	F6-NURSERY-MAGIC-POP-8W:2348	ICRISAT, Hyderabad, INDIA
332	ICGR 171073	Cross 3/RIL 3	ICGV 91114/ICGV 00440//ICGV 6040/ICGV 00308///55-437/GPBD 4//ICGV 5155/ICGV 88145	F6-NURSERY-MAGIC-POP-8W:365	ICRISAT, Hyderabad, INDIA
333	ICGR 171402	Cross 4/RIL 4	ICGV 91114/ICGV 5155//ICGV 6040/ICGV 88145///55-437/ICGV 00440//ICGV 00308/GPBD 4	F6-NURSERY-MAGIC-POP-8W:2059	ICRISAT, Hyderabad, INDIA
334	ICGR 171300	Cross 1/RIL 1	ICGV 91114/GPBD 4//55-437/ICGV 88145///ICGV 6040/ICGV 5155//ICGV 00440/ICGV 00308	F6-NURSERY-MAGIC-POP-8W:1518	ICRISAT, Hyderabad, INDIA
335	ICGR 171354	Cross 1/RIL 1	ICGV 91114/GPBD 4//55-437/ICGV 88145///ICGV 6040/ICGV 5155//ICGV 00440/ICGV 00308	F6-NURSERY-MAGIC-POP-8W:1772	ICRISAT, Hyderabad, INDIA
336	ICGR 171176	Cross 2/RIL 2	ICGV 91114/ICGV 00308//ICGV 6040/ICGV 00440///55-437/ICGV 5155//GPBD 4/ICGV 88145	F6-NURSERY-MAGIC-POP-8W:930	ICRISAT, Hyderabad, INDIA
337	ICGR 171432	Cross 4/RIL 4	ICGV 91114/ICGV 5155//ICGV 6040/ICGV 88145///55-437/ICGV 00440//ICGV 00308/GPBD 4	F6-NURSERY-MAGIC-POP-8W:2221	ICRISAT, Hyderabad, INDIA
338	ICGR 171225	Cross 2/RIL 2	ICGV 91114/ICGV 00308//ICGV 6040/ICGV 00440///55-437/ICGV 5155//GPBD 4/ICGV 88145	F6-NURSERY-MAGIC-POP-8W:1154	ICRISAT, Hyderabad, INDIA
339	ICGR 171216	Cross 2/RIL 2	ICGV 91114/ICGV 00308//ICGV 6040/ICGV 00440///55-437/ICGV 5155//GPBD 4/ICGV 88145	F6-NURSERY-MAGIC-POP-8W:1135	ICRISAT, Hyderabad, INDIA
340	ICGR 171544	Cross 5/RIL 5	ICGV 91114/ICGV 88145//55-437/ICGV 00308///ICGV 6040/GPBD 4//ICGV 00440/ICGV 5155	F6-NURSERY-MAGIC-POP-8W:2681	ICRISAT, Hyderabad, INDIA
341	ICGR 171187	Cross 2/RIL 2	ICGV 91114/ICGV 00308//ICGV 6040/ICGV 00440///55-437/ICGV 5155//GPBD 4/ICGV 88145	F6-NURSERY-MAGIC-POP-8W:966	ICRISAT, Hyderabad, INDIA
342	ICGR 171167	Cross 2/RIL 2	ICGV 91114/ICGV 00308//ICGV 6040/ICGV 00440///55-437/ICGV 5155//GPBD 4/ICGV 88145	F6-NURSERY-MAGIC-POP-8W:881	ICRISAT, Hyderabad, INDIA
343	ICGR 171545	Cross 5/RIL 5	ICGV 91114/ICGV 88145//55-437/ICGV 00308///ICGV 6040/GPBD 4//ICGV 00440/ICGV 5155	F6-NURSERY-MAGIC-POP-8W:2684	ICRISAT, Hyderabad, INDIA
344	ICGR 171531	Cross 5/RIL 5	ICGV 91114/ICGV 88145//55-437/ICGV 00308///ICGV 6040/GPBD 4//ICGV 00440/ICGV 5155	F6-NURSERY-MAGIC-POP-8W:2636	ICRISAT, Hyderabad, INDIA
345	ICGR 171237	Cross 2/RIL 2	ICGV 91114/ICGV 00308//ICGV 6040/ICGV 00440///55-437/ICGV 5155//GPBD 4/ICGV 88145	F6-NURSERY-MAGIC-POP-8W:1190	ICRISAT, Hyderabad, INDIA
346	ICGR 171036	Cross 3/RIL 3	ICGV 91114/ICGV 00440//ICGV 6040/ICGV 00308///55-437/GPBD 4//ICGV 5155/ICGV 88145	F6-NURSERY-MAGIC-POP-8W:169	ICRISAT, Hyderabad, INDIA
347	ICGR 171578	Cross 5/RIL 5	ICGV 91114/ICGV 88145//55-437/ICGV 00308///ICGV 6040/GPBD 4//ICGV 00440/ICGV 5155	F6-NURSERY-MAGIC-POP-8W:2888	ICRISAT, Hyderabad, INDIA
348	ICGR 171594	Cross 5/RIL 5	ICGV 91114/ICGV 88145//55-437/ICGV 00308///ICGV 6040/GPBD 4//ICGV 00440/ICGV 5155	F6-NURSERY-MAGIC-POP-8W:2947	ICRISAT, Hyderabad, INDIA
349	ICGR 171263	Cross 1/RIL 1	ICGV 91114/GPBD 4//55-437/ICGV 88145///ICGV 6040/ICGV 5155//ICGV 00440/ICGV 00308	F6-NURSERY-MAGIC-POP-8W:1297	ICRISAT, Hyderabad, INDIA
350	ICGR 171519	Cross 5/RIL 5	ICGV 91114/ICGV 88145//55-437/ICGV 00308///ICGV 6040/GPBD 4//ICGV 00440/ICGV 5155	F6-NURSERY-MAGIC-POP-8W:2574	ICRISAT, Hyderabad, INDIA
351	ICGR 171100	Cross 3/RIL 3	ICGV 91114/ICGV 00440//ICGV 6040/ICGV 00308///55-437/GPBD 4//ICGV 5155/ICGV 88145	F6-NURSERY-MAGIC-POP-8W:480	ICRISAT, Hyderabad, INDIA
352	ICGR 171540	Cross 5/RIL 5	ICGV 91114/ICGV 88145//55-437/ICGV 00308///ICGV 6040/GPBD 4//ICGV 00440/ICGV 5155	F6-NURSERY-MAGIC-POP-8W:2664	ICRISAT, Hyderabad, INDIA
353	ICGR 171582	Cross 5/RIL 5	ICGV 91114/ICGV 88145//55-437/ICGV 00308///ICGV 6040/GPBD 4//ICGV 00440/ICGV 5155	F6-NURSERY-MAGIC-POP-8W:2898	ICRISAT, Hyderabad, INDIA
354	ICGR 171574	Cross 5/RIL 5	ICGV 91114/ICGV 88145//55-437/ICGV 00308///ICGV 6040/GPBD 4//ICGV 00440/ICGV 5155	F6-NURSERY-MAGIC-POP-8W:2876	ICRISAT, Hyderabad, INDIA
355	ICGR 171277	Cross 1/RIL 1	ICGV 91114/GPBD 4//55-437/ICGV 88145///ICGV 6040/ICGV 5155//ICGV 00440/ICGV 00308	F6-NURSERY-MAGIC-POP-8W:1375	ICRISAT, Hyderabad, INDIA
356	ICGR 171597	Cross 5/RIL 5	ICGV 91114/ICGV 88145//55-437/ICGV 00308///ICGV 6040/GPBD 4//ICGV 00440/ICGV 5155	F6-NURSERY-MAGIC-POP-8W:2959	ICRISAT, Hyderabad, INDIA
357	ICGR 171365	Cross 4/RIL 4	ICGV 91114/ICGV 5155//ICGV 6040/ICGV 88145///55-437/ICGV 00440//ICGV 00308/GPBD 4	F6-NURSERY-MAGIC-POP-8W:1829	ICRISAT, Hyderabad, INDIA
358	ICGR 171474	Cross 4/RIL 4	ICGV 91114/ICGV 5155//ICGV 6040/ICGV 88145///55-437/ICGV 00440//ICGV 00308/GPBD 4	F6-NURSERY-MAGIC-POP-8W:2372	ICRISAT, Hyderabad, INDIA
359	ICGR 171303	Cross 1/RIL 1	ICGV 91114/GPBD 4//55-437/ICGV 88145///ICGV 6040/ICGV 5155//ICGV 00440/ICGV 00308	F6-NURSERY-MAGIC-POP-8W:1554	ICRISAT, Hyderabad, INDIA
360	ICGR 171230	Cross 2/RIL 2	ICGV 91114/ICGV 00308//ICGV 6040/ICGV 00440///55-437/ICGV 5155//GPBD 4/ICGV 88145	F6-NURSERY-MAGIC-POP-8W:1162	ICRISAT, Hyderabad, INDIA
361	ICGR 171412	Cross 4/RIL 4	ICGV 91114/ICGV 5155//ICGV 6040/ICGV 88145///55-437/ICGV 00440//ICGV 00308/GPBD 4	F6-NURSERY-MAGIC-POP-8W:2102	ICRISAT, Hyderabad, INDIA
362	ICGR 171413	Cross 4/RIL 4	ICGV 91114/ICGV 5155//ICGV 6040/ICGV 88145///55-437/ICGV 00440//ICGV 00308/GPBD 4	F6-NURSERY-MAGIC-POP-8W:2103	ICRISAT, Hyderabad, INDIA
363	ICGR 171503	Cross 5/RIL 5	ICGV 91114/ICGV 88145//55-437/ICGV 00308///ICGV 6040/GPBD 4//ICGV 00440/ICGV 5155	F6-NURSERY-MAGIC-POP-8W:2496	ICRISAT, Hyderabad, INDIA
364	ICGR 171351	Cross 1/RIL 1	ICGV 91114/GPBD 4//55-437/ICGV 88145///ICGV 6040/ICGV 5155//ICGV 00440/ICGV 00308	F6-NURSERY-MAGIC-POP-8W:1763	ICRISAT, Hyderabad, INDIA
365	ICGR 171455	Cross 4/RIL 4	ICGV 91114/ICGV 5155//ICGV 6040/ICGV 88145///55-437/ICGV 00440//ICGV 00308/GPBD 4	F6-NURSERY-MAGIC-POP-8W:2324	ICRISAT, Hyderabad, INDIA
366	ICGR 171483	Cross 5/RIL 5	ICGV 91114/ICGV 88145//55-437/ICGV 00308///ICGV 6040/GPBD 4//ICGV 00440/ICGV 5155	F6-NURSERY-MAGIC-POP-8W:2414	ICRISAT, Hyderabad, INDIA
367	ICGR 171183	Cross 2/RIL 2	ICGV 91114/ICGV 00308//ICGV 6040/ICGV 00440///55-437/ICGV 5155//GPBD 4/ICGV 88145	F6-NURSERY-MAGIC-POP-8W:960	ICRISAT, Hyderabad, INDIA
368	ICGR 171536	Cross 5/RIL 5	ICGV 91114/ICGV 88145//55-437/ICGV 00308///ICGV 6040/GPBD 4//ICGV 00440/ICGV 5155	F6-NURSERY-MAGIC-POP-8W:2656	ICRISAT, Hyderabad, INDIA
369	ICGR 171511	Cross 5/RIL 5	ICGV 91114/ICGV 88145//55-437/ICGV 00308///ICGV 6040/GPBD 4//ICGV 00440/ICGV 5155	F6-NURSERY-MAGIC-POP-8W:2539	ICRISAT, Hyderabad, INDIA
370	ICGR 171512	Cross 5/RIL 5	ICGV 91114/ICGV 88145//55-437/ICGV 00308///ICGV 6040/GPBD 4//ICGV 00440/ICGV 5155	F6-NURSERY-MAGIC-POP-8W:2541	ICRISAT, Hyderabad, INDIA
371	ICGR 171580	Cross 5/RIL 5	ICGV 91114/ICGV 88145//55-437/ICGV 00308///ICGV 6040/GPBD 4//ICGV 00440/ICGV 5155	F6-NURSERY-MAGIC-POP-8W:2890	ICRISAT, Hyderabad, INDIA
372	ICGR 171589	Cross 5/RIL 5	ICGV 91114/ICGV 88145//55-437/ICGV 00308///ICGV 6040/GPBD 4//ICGV 00440/ICGV 5155	F6-NURSERY-MAGIC-POP-8W:2924	ICRISAT, Hyderabad, INDIA
373	ICGR 171066	Cross 3/RIL 3	ICGV 91114/ICGV 00440//ICGV 6040/ICGV 00308///55-437/GPBD 4//ICGV 5155/ICGV 88145	F6-NURSERY-MAGIC-POP-8W:336	ICRISAT, Hyderabad, INDIA
374	ICGR 171012	Cross 3/RIL 3	ICGV 91114/ICGV 00440//ICGV 6040/ICGV 00308///55-437/GPBD 4//ICGV 5155/ICGV 88145	F6-NURSERY-MAGIC-POP-8W:52	ICRISAT, Hyderabad, INDIA
375	ICGR 171042	Cross 3/RIL 3	ICGV 91114/ICGV 00440//ICGV 6040/ICGV 00308///55-437/GPBD 4//ICGV 5155/ICGV 88145	F6-NURSERY-MAGIC-POP-8W:207	ICRISAT, Hyderabad, INDIA
376	ICGR 171201	Cross 2/RIL 2	ICGV 91114/ICGV 00308//ICGV 6040/ICGV 00440///55-437/ICGV 5155//GPBD 4/ICGV 88145	F6-NURSERY-MAGIC-POP-8W:1052	ICRISAT, Hyderabad, INDIA
377	ICGR 171174	Cross 2/RIL 2	ICGV 91114/ICGV 00308//ICGV 6040/ICGV 00440///55-437/ICGV 5155//GPBD 4/ICGV 88145	F6-NURSERY-MAGIC-POP-8W:917	ICRISAT, Hyderabad, INDIA
378	ICGR 171288	Cross 1/RIL 1	ICGV 91114/GPBD 4//55-437/ICGV 88145///ICGV 6040/ICGV 5155//ICGV 00440/ICGV 00308	F6-NURSERY-MAGIC-POP-8W:1470	ICRISAT, Hyderabad, INDIA
379	ICGR 171184	Cross 2/RIL 2	ICGV 91114/ICGV 00308//ICGV 6040/ICGV 00440///55-437/ICGV 5155//GPBD 4/ICGV 88145	F6-NURSERY-MAGIC-POP-8W:961	ICRISAT, Hyderabad, INDIA
380	ICGV 171174		Unknown		ICRISAT, Hyderabad, INDIA
381	ICGR 171375	Cross 4/RIL 4	ICGV 91114/ICGV 5155//ICGV 6040/ICGV 88145///55-437/ICGV 00440//ICGV 00308/GPBD 4	F6-NURSERY-MAGIC-POP-8W:1881	ICRISAT, Hyderabad, INDIA
382	ICGR 171532	Cross 5/RIL 5	ICGV 91114/ICGV 88145//55-437/ICGV 00308///ICGV 6040/GPBD 4//ICGV 00440/ICGV 5155	F6-NURSERY-MAGIC-POP-8W:2641	ICRISAT, Hyderabad, INDIA
383	ICGR 171165	Cross 2/RIL 2	ICGV 91114/ICGV 00308//ICGV 6040/ICGV 00440///55-437/ICGV 5155//GPBD 4/ICGV 88145	F6-NURSERY-MAGIC-POP-8W:875	ICRISAT, Hyderabad, INDIA
384	ICGR 171196	Cross 2/RIL 2	ICGV 91114/ICGV 00308//ICGV 6040/ICGV 00440///55-437/ICGV 5155//GPBD 4/ICGV 88145	F6-NURSERY-MAGIC-POP-8W:1032	ICRISAT, Hyderabad, INDIA
385	ICGR 171570	Cross 5/RIL 5	ICGV 91114/ICGV 88145//55-437/ICGV 00308///ICGV 6040/GPBD 4//ICGV 00440/ICGV 5155	F6-NURSERY-MAGIC-POP-8W:2826	ICRISAT, Hyderabad, INDIA
386	ICGR 171332	Cross 1/RIL 1	ICGV 91114/GPBD 4//55-437/ICGV 88145///ICGV 6040/ICGV 5155//ICGV 00440/ICGV 00308	F6-NURSERY-MAGIC-POP-8W:1694	ICRISAT, Hyderabad, INDIA
387	ICGR 171370	Cross 4/RIL 4	ICGV 91114/ICGV 5155//ICGV 6040/ICGV 88145///55-437/ICGV 00440//ICGV 00308/GPBD 4	F6-NURSERY-MAGIC-POP-8W:1859	ICRISAT, Hyderabad, INDIA
388	ICGR 171406	Cross 4/RIL 4	ICGV 91114/ICGV 5155//ICGV 6040/ICGV 88145///55-437/ICGV 00440//ICGV 00308/GPBD 4	F6-NURSERY-MAGIC-POP-8W:2072	ICRISAT, Hyderabad, INDIA
389	ICGR 171335	Cross 1/RIL 1	ICGV 91114/GPBD 4//55-437/ICGV 88145///ICGV 6040/ICGV 5155//ICGV 00440/ICGV 00308	F6-NURSERY-MAGIC-POP-8W:1703	ICRISAT, Hyderabad, INDIA
390	ICGR 171572	Cross 5/RIL 5	ICGV 91114/ICGV 88145//55-437/ICGV 00308///ICGV 6040/GPBD 4//ICGV 00440/ICGV 5155	F6-NURSERY-MAGIC-POP-8W:2849	ICRISAT, Hyderabad, INDIA
391	ICGR 171291	Cross 1/RIL 1	ICGV 91114/GPBD 4//55-437/ICGV 88145///ICGV 6040/ICGV 5155//ICGV 00440/ICGV 00308	F6-NURSERY-MAGIC-POP-8W:1478	ICRISAT, Hyderabad, INDIA
392	ICGR 171267	Cross 1/RIL 1	ICGV 91114/GPBD 4//55-437/ICGV 88145///ICGV 6040/ICGV 5155//ICGV 00440/ICGV 00308	F6-NURSERY-MAGIC-POP-8W:1324	ICRISAT, Hyderabad, INDIA
393	ICGR 171284	Cross 1/RIL 1	ICGV 91114/GPBD 4//55-437/ICGV 88145///ICGV 6040/ICGV 5155//ICGV 00440/ICGV 00308	F6-NURSERY-MAGIC-POP-8W:1434	ICRISAT, Hyderabad, INDIA
394	ICGR 171429	Cross 4/RIL 4	ICGV 91114/ICGV 5155//ICGV 6040/ICGV 88145///55-437/ICGV 00440//ICGV 00308/GPBD 4	F6-NURSERY-MAGIC-POP-8W:2208	ICRISAT, Hyderabad, INDIA
395	ICGV 14421		ICGV 91114 × GPBD 4	ICRISAT	ICRISAT, Hyderabad, INDIA
396	ICGR 171289	Cross 1/RIL 1	ICGV 91114/GPBD 4//55-437/ICGV 88145///ICGV 6040/ICGV 5155//ICGV 00440/ICGV 00308	F6-NURSERY-MAGIC-POP-8W:1472	ICRISAT, Hyderabad, INDIA
397	ICGR 171058	Cross 3/RIL 3	ICGV 91114/ICGV 00440//ICGV 6040/ICGV 00308///55-437/GPBD 4//ICGV 5155/ICGV 88145	F6-NURSERY-MAGIC-POP-8W:296	ICRISAT, Hyderabad, INDIA
398	ICGR 171337	Cross 1/RIL 1	ICGV 91114/GPBD 4//55-437/ICGV 88145///ICGV 6040/ICGV 5155//ICGV 00440/ICGV 00308	F6-NURSERY-MAGIC-POP-8W:1706	ICRISAT, Hyderabad, INDIA
399	ICGR 171070	Cross 3/RIL 3	ICGV 91114/ICGV 00440//ICGV 6040/ICGV 00308///55-437/GPBD 4//ICGV 5155/ICGV 88145	F6-NURSERY-MAGIC-POP-8W:344	ICRISAT, Hyderabad, INDIA
400	ICGR 171151	Cross 2/RIL 2	ICGV 91114/ICGV 00308//ICGV 6040/ICGV 00440///55-437/ICGV 5155//GPBD 4/ICGV 88145	F6-NURSERY-MAGIC-POP-8W:793	ICRISAT, Hyderabad, INDIA
401	ICGR 171559	Cross 5/RIL 5	ICGV 91114/ICGV 88145//55-437/ICGV 00308///ICGV 6040/GPBD 4//ICGV 00440/ICGV 5155	F6-NURSERY-MAGIC-POP-8W:2768	ICRISAT, Hyderabad, INDIA
402	ICGR 171457	Cross 4/RIL 4	ICGV 91114/ICGV 5155//ICGV 6040/ICGV 88145///55-437/ICGV 00440//ICGV 00308/GPBD 4	F6-NURSERY-MAGIC-POP-8W:2328	ICRISAT, Hyderabad, INDIA
403	ICGR 171376	Cross 4/RIL 4	ICGV 91114/ICGV 5155//ICGV 6040/ICGV 88145///55-437/ICGV 00440//ICGV 00308/GPBD 4	F6-NURSERY-MAGIC-POP-8W:1884	ICRISAT, Hyderabad, INDIA
404	ICGR 171479	Cross 4/RIL 4	ICGV 91114/ICGV 5155//ICGV 6040/ICGV 88145///55-437/ICGV 00440//ICGV 00308/GPBD 4	F6-NURSERY-MAGIC-POP-8W:2390	ICRISAT, Hyderabad, INDIA
405	ICGR 171218	Cross 2/RIL 2	ICGV 91114/ICGV 00308//ICGV 6040/ICGV 00440///55-437/ICGV 5155//GPBD 4/ICGV 88145	F6-NURSERY-MAGIC-POP-8W:1137	ICRISAT, Hyderabad, INDIA
406	ICGR 171192	Cross 2/RIL 2	ICGV 91114/ICGV 00308//ICGV 6040/ICGV 00440///55-437/ICGV 5155//GPBD 4/ICGV 88145	F6-NURSERY-MAGIC-POP-8W:1011	ICRISAT, Hyderabad, INDIA
407	ICGR 171443	Cross 4/RIL 4	ICGV 91114/ICGV 5155//ICGV 6040/ICGV 88145///55-437/ICGV 00440//ICGV 00308/GPBD 4	F6-NURSERY-MAGIC-POP-8W:2280	ICRISAT, Hyderabad, INDIA
408	ICGR 171390	Cross 4/RIL 4	ICGV 91114/ICGV 5155//ICGV 6040/ICGV 88145///55-437/ICGV 00440//ICGV 00308/GPBD 4	F6-NURSERY-MAGIC-POP-8W:1978	ICRISAT, Hyderabad, INDIA
409	ICGR 171276	Cross 1/RIL 1	ICGV 91114/GPBD 4//55-437/ICGV 88145///ICGV 6040/ICGV 5155//ICGV 00440/ICGV 00308	F6-NURSERY-MAGIC-POP-8W:1369	ICRISAT, Hyderabad, INDIA
410	ICGR 171159	Cross 2/RIL 2	ICGV 91114/ICGV 00308//ICGV 6040/ICGV 00440///55-437/ICGV 5155//GPBD 4/ICGV 88145	F6-NURSERY-MAGIC-POP-8W:852	ICRISAT, Hyderabad, INDIA
411	ICGR 171035	Cross 3/RIL 3	ICGV 91114/ICGV 00440//ICGV 6040/ICGV 00308///55-437/GPBD 4//ICGV 5155/ICGV 88145	F6-NURSERY-MAGIC-POP-8W:165	ICRISAT, Hyderabad, INDIA
412	ICGR 171193	Cross 2/RIL 2	ICGV 91114/ICGV 00308//ICGV 6040/ICGV 00440///55-437/ICGV 5155//GPBD 4/ICGV 88145	F6-NURSERY-MAGIC-POP-8W:1016	ICRISAT, Hyderabad, INDIA
413	ICGR 171502	Cross 5/RIL 5	ICGV 91114/ICGV 88145//55-437/ICGV 00308///ICGV 6040/GPBD 4//ICGV 00440/ICGV 5155	F6-NURSERY-MAGIC-POP-8W:2493	ICRISAT, Hyderabad, INDIA
414	ICGR 171063	Cross 3/RIL 3	ICGV 91114/ICGV 00440//ICGV 6040/ICGV 00308///55-437/GPBD 4//ICGV 5155/ICGV 88145	F6-NURSERY-MAGIC-POP-8W:313	ICRISAT, Hyderabad, INDIA
415	ICGR 171256	Cross 1/RIL 1	ICGV 91114/GPBD 4//55-437/ICGV 88145///ICGV 6040/ICGV 5155//ICGV 00440/ICGV 00308	F6-NURSERY-MAGIC-POP-8W:1265	ICRISAT, Hyderabad, INDIA
416	ICGV00440	Parent	(ICGV 88386 × ASHFORD) × ICGV 95172	ICRISAT	ICRISAT, Hyderabad, INDIA
417	ICGR 171202	Cross 2/RIL 2	ICGV 91114/ICGV 00308//ICGV 6040/ICGV 00440///55-437/ICGV 5155//GPBD 4/ICGV 88145	F6-NURSERY-MAGIC-POP-8W:1053	ICRISAT, Hyderabad, INDIA
418	ICGR 171421	Cross 4/RIL 4	ICGV 91114/ICGV 5155//ICGV 6040/ICGV 88145///55-437/ICGV 00440//ICGV 00308/GPBD 4	F6-NURSERY-MAGIC-POP-8W:2160	ICRISAT, Hyderabad, INDIA
419	ICGR 171038	Cross 3/RIL 3	ICGV 91114/ICGV 00440//ICGV 6040/ICGV 00308///55-437/GPBD 4//ICGV 5155/ICGV 88145	F6-NURSERY-MAGIC-POP-8W:189	ICRISAT, Hyderabad, INDIA
420	ICGR 171305	Cross 1/RIL 1	ICGV 91114/GPBD 4//55-437/ICGV 88145///ICGV 6040/ICGV 5155//ICGV 00440/ICGV 00308	F6-NURSERY-MAGIC-POP-8W:1561	ICRISAT, Hyderabad, INDIA
421	ICGR 171153	Cross 2/RIL 2	ICGV 91114/ICGV 00308//ICGV 6040/ICGV 00440///55-437/ICGV 5155//GPBD 4/ICGV 88145	F6-NURSERY-MAGIC-POP-8W:817	ICRISAT, Hyderabad, INDIA
422	ICGR 171173	Cross 2/RIL 2	ICGV 91114/ICGV 00308//ICGV 6040/ICGV 00440///55-437/ICGV 5155//GPBD 4/ICGV 88145	F6-NURSERY-MAGIC-POP-8W:908	ICRISAT, Hyderabad, INDIA
423	ICGR 171206	Cross 2/RIL 2	ICGV 91114/ICGV 00308//ICGV 6040/ICGV 00440///55-437/ICGV 5155//GPBD 4/ICGV 88145	F6-NURSERY-MAGIC-POP-8W:1087	ICRISAT, Hyderabad, INDIA
424	ICGV05155	Parent	(ICGV 99160 × ICGV 99240)	ICRISAT	ICRISAT, Hyderabad, INDIA
425	ICGV02266	Check	ICGV 94143 × ICGV 94136	ICRISAT	ICRISAT, Hyderabad, INDIA
426	ICGR 171222	Cross 2/RIL 2	ICGV 91114/ICGV 00308//ICGV 6040/ICGV 00440///55-437/ICGV 5155//GPBD 4/ICGV 88145	F6-NURSERY-MAGIC-POP-8W:1145	ICRISAT, Hyderabad, INDIA
427	ICGR 171068	Cross 3/RIL 3	ICGV 91114/ICGV 00440//ICGV 6040/ICGV 00308///55-437/GPBD 4//ICGV 5155/ICGV 88145	F6-NURSERY-MAGIC-POP-8W:338	ICRISAT, Hyderabad, INDIA
428	ICGR 171537	Cross 5/RIL 5	ICGV 91114/ICGV 88145//55-437/ICGV 00308///ICGV 6040/GPBD 4//ICGV 00440/ICGV 5155	F6-NURSERY-MAGIC-POP-8W:2661	ICRISAT, Hyderabad, INDIA
429	ICGS 76	Check	ICGV 87141 (TMV 10 × Chico)	ICRISAT	ICRISAT, Hyderabad, INDIA
430	JL 24	Check	Selection from EC-94943	ICRISAT	ICRISAT, Hyderabad, INDIA
431	ICGR 171016	Cross 3/RIL 3	ICGV 91114/ICGV 00440//ICGV 6040/ICGV 00308///55-437/GPBD 4//ICGV 5155/ICGV 88145	F6-NURSERY-MAGIC-POP-8W:61	ICRISAT, Hyderabad, INDIA
432	ICGR 171392	Cross 4/RIL 4	ICGV 91114/ICGV 5155//ICGV 6040/ICGV 88145///55-437/ICGV 00440//ICGV 00308/GPBD 4	F6-NURSERY-MAGIC-POP-8W:1983	ICRISAT, Hyderabad, INDIA
433	ICGR 171461	Cross 4/RIL 4	ICGV 91114/ICGV 5155//ICGV 6040/ICGV 88145///55-437/ICGV 00440//ICGV 00308/GPBD 4	F6-NURSERY-MAGIC-POP-8W:2342	ICRISAT, Hyderabad, INDIA
434	ICGR 171450	Cross 4/RIL 4	ICGV 91114/ICGV 5155//ICGV 6040/ICGV 88145///55-437/ICGV 00440//ICGV 00308/GPBD 4	F6-NURSERY-MAGIC-POP-8W:2301	ICRISAT, Hyderabad, INDIA
435	ICGR 171138	Cross 2/RIL 2	ICGV 91114/ICGV 00308//ICGV 6040/ICGV 00440///55-437/ICGV 5155//GPBD 4/ICGV 88145	F6-NURSERY-MAGIC-POP-8W:678	ICRISAT, Hyderabad, INDIA
436	ICGR 171062	Cross 3/RIL 3	ICGV 91114/ICGV 00440//ICGV 6040/ICGV 00308///55-437/GPBD 4//ICGV 5155/ICGV 88145	F6-NURSERY-MAGIC-POP-8W:301	ICRISAT, Hyderabad, INDIA
437	ICGR 171522	Cross 5/RIL 5	ICGV 91114/ICGV 88145//55-437/ICGV 00308///ICGV 6040/GPBD 4//ICGV 00440/ICGV 5155	F6-NURSERY-MAGIC-POP-8W:2605	ICRISAT, Hyderabad, INDIA
438	ICGR 171013	Cross 3/RIL 3	ICGV 91114/ICGV 00440//ICGV 6040/ICGV 00308///55-437/GPBD 4//ICGV 5155/ICGV 88145	F6-NURSERY-MAGIC-POP-8W:56	ICRISAT, Hyderabad, INDIA
439	ICGR 171104	Cross 3/RIL 3	ICGV 91114/ICGV 00440//ICGV 6040/ICGV 00308///55-437/GPBD 4//ICGV 5155/ICGV 88145	F6-NURSERY-MAGIC-POP-8W:509	ICRISAT, Hyderabad, INDIA
440	ICGR 171197	Cross 2/RIL 2	ICGV 91114/ICGV 00308//ICGV 6040/ICGV 00440///55-437/ICGV 5155//GPBD 4/ICGV 88145	F6-NURSERY-MAGIC-POP-8W:1033	ICRISAT, Hyderabad, INDIA
441	ICGR 171014	Cross 3/RIL 3	ICGV 91114/ICGV 00440//ICGV 6040/ICGV 00308///55-437/GPBD 4//ICGV 5155/ICGV 88145	F6-NURSERY-MAGIC-POP-8W:57	ICRISAT, Hyderabad, INDIA
442	ICGR 171339	Cross 1/RIL 1	ICGV 91114/GPBD 4//55-437/ICGV 88145///ICGV 6040/ICGV 5155//ICGV 00440/ICGV 00308	F6-NURSERY-MAGIC-POP-8W:1709	ICRISAT, Hyderabad, INDIA
443	ICGR 171281	Cross 1/RIL 1	ICGV 91114/GPBD 4//55-437/ICGV 88145///ICGV 6040/ICGV 5155//ICGV 00440/ICGV 00308	F6-NURSERY-MAGIC-POP-8W:1399	ICRISAT, Hyderabad, INDIA
444	ICGR 171253	Cross 1/RIL 1	ICGV 91114/GPBD 4//55-437/ICGV 88145///ICGV 6040/ICGV 5155//ICGV 00440/ICGV 00308	F6-NURSERY-MAGIC-POP-8W:1257	ICRISAT, Hyderabad, INDIA
445	ICGR 171567	Cross 5/RIL 5	ICGV 91114/ICGV 88145//55-437/ICGV 00308///ICGV 6040/GPBD 4//ICGV 00440/ICGV 5155	F6-NURSERY-MAGIC-POP-8W:2808	ICRISAT, Hyderabad, INDIA
446	ICGR 171588	Cross 5/RIL 5	ICGV 91114/ICGV 88145//55-437/ICGV 00308///ICGV 6040/GPBD 4//ICGV 00440/ICGV 5155	F6-NURSERY-MAGIC-POP-8W:2916	ICRISAT, Hyderabad, INDIA
447	ICGR 171245	Cross 1/RIL 1	ICGV 91114/GPBD 4//55-437/ICGV 88145///ICGV 6040/ICGV 5155//ICGV 00440/ICGV 00308	F6-NURSERY-MAGIC-POP-8W:1219	ICRISAT, Hyderabad, INDIA
448	ICGR 171407	Cross 4/RIL 4	ICGV 91114/ICGV 5155//ICGV 6040/ICGV 88145///55-437/ICGV 00440//ICGV 00308/GPBD 4	F6-NURSERY-MAGIC-POP-8W:2076	ICRISAT, Hyderabad, INDIA
449	ICGR 171448	Cross 4/RIL 4	ICGV 91114/ICGV 5155//ICGV 6040/ICGV 88145///55-437/ICGV 00440//ICGV 00308/GPBD 4	F6-NURSERY-MAGIC-POP-8W:2293	ICRISAT, Hyderabad, INDIA
450	ICGR 171128	Cross 2/RIL 2	ICGV 91114/ICGV 00308//ICGV 6040/ICGV 00440///55-437/ICGV 5155//GPBD 4/ICGV 88145	F6-NURSERY-MAGIC-POP-8W:630	ICRISAT, Hyderabad, INDIA
451	ICGR 171049	Cross 3/RIL 3	ICGV 91114/ICGV 00440//ICGV 6040/ICGV 00308///55-437/GPBD 4//ICGV 5155/ICGV 88145	F6-NURSERY-MAGIC-POP-8W:253	ICRISAT, Hyderabad, INDIA
452	ICGR 171546	Cross 5/RIL 5	ICGV 91114/ICGV 88145//55-437/ICGV 00308///ICGV 6040/GPBD 4//ICGV 00440/ICGV 5155	F6-NURSERY-MAGIC-POP-8W:2690	ICRISAT, Hyderabad, INDIA
453	ICGR 171573	Cross 5/RIL 5	ICGV 91114/ICGV 88145//55-437/ICGV 00308///ICGV 6040/GPBD 4//ICGV 00440/ICGV 5155	F6-NURSERY-MAGIC-POP-8W:2854	ICRISAT, Hyderabad, INDIA
454	ICGR 171190	Cross 2/RIL 2	ICGV 91114/ICGV 00308//ICGV 6040/ICGV 00440///55-437/ICGV 5155//GPBD 4/ICGV 88145	F6-NURSERY-MAGIC-POP-8W:1001	ICRISAT, Hyderabad, INDIA
455	ICGR 171264	Cross 1/RIL 1	ICGV 91114/GPBD 4//55-437/ICGV 88145///ICGV 6040/ICGV 5155//ICGV 00440/ICGV 00308	F6-NURSERY-MAGIC-POP-8W:1318	ICRISAT, Hyderabad, INDIA
456	ICGR 171430	Cross 4/RIL 4	ICGV 91114/ICGV 5155//ICGV 6040/ICGV 88145///55-437/ICGV 00440//ICGV 00308/GPBD 4	F6-NURSERY-MAGIC-POP-8W:2213	ICRISAT, Hyderabad, INDIA
457	ICGR 171343	Cross 1/RIL 1	ICGV 91114/GPBD 4//55-437/ICGV 88145///ICGV 6040/ICGV 5155//ICGV 00440/ICGV 00308	F6-NURSERY-MAGIC-POP-8W:1736	ICRISAT, Hyderabad, INDIA
458	ICGR 171037	Cross 3/RIL 3	ICGV 91114/ICGV 00440//ICGV 6040/ICGV 00308///55-437/GPBD 4//ICGV 5155/ICGV 88145	F6-NURSERY-MAGIC-POP-8W:171	ICRISAT, Hyderabad, INDIA
459	ICGR 171226	Cross 2/RIL 2	ICGV 91114/ICGV 00308//ICGV 6040/ICGV 00440///55-437/ICGV 5155//GPBD 4/ICGV 88145	F6-NURSERY-MAGIC-POP-8W:1155	ICRISAT, Hyderabad, INDIA
460	ICGR 171491	Cross 5/RIL 5	ICGV 91114/ICGV 88145//55-437/ICGV 00308///ICGV 6040/GPBD 4//ICGV 00440/ICGV 5155	F6-NURSERY-MAGIC-POP-8W:2457	ICRISAT, Hyderabad, INDIA
461	ICGR 171140	Cross 2/RIL 2	ICGV 91114/ICGV 00308//ICGV 6040/ICGV 00440///55-437/ICGV 5155//GPBD 4/ICGV 88145	F6-NURSERY-MAGIC-POP-8W:689	ICRISAT, Hyderabad, INDIA
462	ICGR 171533	Cross 5/RIL 5	ICGV 91114/ICGV 88145//55-437/ICGV 00308///ICGV 6040/GPBD 4//ICGV 00440/ICGV 5155	F6-NURSERY-MAGIC-POP-8W:2642	ICRISAT, Hyderabad, INDIA
463	ICGR 171231	Cross 2/RIL 2	ICGV 91114/ICGV 00308//ICGV 6040/ICGV 00440///55-437/ICGV 5155//GPBD 4/ICGV 88145	F6-NURSERY-MAGIC-POP-8W:1173	ICRISAT, Hyderabad, INDIA
464	ICGR 171211	Cross 2/RIL 2	ICGV 91114/ICGV 00308//ICGV 6040/ICGV 00440///55-437/ICGV 5155//GPBD 4/ICGV 88145	F6-NURSERY-MAGIC-POP-8W:1126	ICRISAT, Hyderabad, INDIA
465	ICGR 171565	Cross 5/RIL 5	ICGV 91114/ICGV 88145//55-437/ICGV 00308///ICGV 6040/GPBD 4//ICGV 00440/ICGV 5155	F6-NURSERY-MAGIC-POP-8W:2794	ICRISAT, Hyderabad, INDIA
466	ICGR 171018	Cross 3/RIL 3	ICGV 91114/ICGV 00440//ICGV 6040/ICGV 00308///55-437/GPBD 4//ICGV 5155/ICGV 88145	F6-NURSERY-MAGIC-POP-8W:65	ICRISAT, Hyderabad, INDIA
467	ICGR 171126	Cross 2/RIL 2	ICGV 91114/ICGV 00308//ICGV 6040/ICGV 00440///55-437/ICGV 5155//GPBD 4/ICGV 88145	F6-NURSERY-MAGIC-POP-8W:628	ICRISAT, Hyderabad, INDIA
468	ICGR 171186	Cross 2/RIL 2	ICGV 91114/ICGV 00308//ICGV 6040/ICGV 00440///55-437/ICGV 5155//GPBD 4/ICGV 88145	F6-NURSERY-MAGIC-POP-8W:963	ICRISAT, Hyderabad, INDIA
469	ICGR 171134	Cross 2/RIL 2	ICGV 91114/ICGV 00308//ICGV 6040/ICGV 00440///55-437/ICGV 5155//GPBD 4/ICGV 88145	F6-NURSERY-MAGIC-POP-8W:661	ICRISAT, Hyderabad, INDIA
470	ICGR 171299	Cross 1/RIL 1	ICGV 91114/GPBD 4//55-437/ICGV 88145///ICGV 6040/ICGV 5155//ICGV 00440/ICGV 00308	F6-NURSERY-MAGIC-POP-8W:1509	ICRISAT, Hyderabad, INDIA
471	ICGR 171393	Cross 4/RIL 4	ICGV 91114/ICGV 5155//ICGV 6040/ICGV 88145///55-437/ICGV 00440//ICGV 00308/GPBD 4	F6-NURSERY-MAGIC-POP-8W:1987	ICRISAT, Hyderabad, INDIA
472	ICGR 171223	Cross 2/RIL 2	ICGV 91114/ICGV 00308//ICGV 6040/ICGV 00440///55-437/ICGV 5155//GPBD 4/ICGV 88145	F6-NURSERY-MAGIC-POP-8W:1148	ICRISAT, Hyderabad, INDIA
473	ICGR 171250	Cross 1/RIL 1	ICGV 91114/GPBD 4//55-437/ICGV 88145///ICGV 6040/ICGV 5155//ICGV 00440/ICGV 00308	F6-NURSERY-MAGIC-POP-8W:1251	ICRISAT, Hyderabad, INDIA
474	ICGR 171150	Cross 2/RIL 2	ICGV 91114/ICGV 00308//ICGV 6040/ICGV 00440///55-437/ICGV 5155//GPBD 4/ICGV 88145	F6-NURSERY-MAGIC-POP-8W:787	ICRISAT, Hyderabad, INDIA
475	ICGR 171026	Cross 3/RIL 3	ICGV 91114/ICGV 00440//ICGV 6040/ICGV 00308///55-437/GPBD 4//ICGV 5155/ICGV 88145	F6-NURSERY-MAGIC-POP-8W:101	ICRISAT, Hyderabad, INDIA
476	ICGR 171052	Cross 3/RIL 3	ICGV 91114/ICGV 00440//ICGV 6040/ICGV 00308///55-437/GPBD 4//ICGV 5155/ICGV 88145	F6-NURSERY-MAGIC-POP-8W:272	ICRISAT, Hyderabad, INDIA
477	ICGR 171296	Cross 1/RIL 1	ICGV 91114/GPBD 4//55-437/ICGV 88145///ICGV 6040/ICGV 5155//ICGV 00440/ICGV 00308	F6-NURSERY-MAGIC-POP-8W:1501	ICRISAT, Hyderabad, INDIA
478	ICGR 171168	Cross 2/RIL 2	ICGV 91114/ICGV 00308//ICGV 6040/ICGV 00440///55-437/ICGV 5155//GPBD 4/ICGV 88145	F6-NURSERY-MAGIC-POP-8W:890	ICRISAT, Hyderabad, INDIA
479	ICGR 171508	Cross 5/RIL 5	ICGV 91114/ICGV 88145//55-437/ICGV 00308///ICGV 6040/GPBD 4//ICGV 00440/ICGV 5155	F6-NURSERY-MAGIC-POP-8W:2513	ICRISAT, Hyderabad, INDIA
480	ICGR 171003	Cross 3/RIL 3	ICGV 91114/ICGV 00440//ICGV 6040/ICGV 00308///55-437/GPBD 4//ICGV 5155/ICGV 88145	F6-NURSERY-MAGIC-POP-8W:11	ICRISAT, Hyderabad, INDIA
481	ICGR 171252	Cross 1/RIL 1	ICGV 91114/GPBD 4//55-437/ICGV 88145///ICGV 6040/ICGV 5155//ICGV 00440/ICGV 00308	F6-NURSERY-MAGIC-POP-8W:1254	ICRISAT, Hyderabad, INDIA
482	ICGR 171397	Cross 4/RIL 4	ICGV 91114/ICGV 5155//ICGV 6040/ICGV 88145///55-437/ICGV 00440//ICGV 00308/GPBD 4	F6-NURSERY-MAGIC-POP-8W:2017	ICRISAT, Hyderabad, INDIA
483	ICGR 171136	Cross 2/RIL 2	ICGV 91114/ICGV 00308//ICGV 6040/ICGV 00440///55-437/ICGV 5155//GPBD 4/ICGV 88145	F6-NURSERY-MAGIC-POP-8W:668	ICRISAT, Hyderabad, INDIA
484	ICGR 171321	Cross 1/RIL 1	ICGV 91114/GPBD 4//55-437/ICGV 88145///ICGV 6040/ICGV 5155//ICGV 00440/ICGV 00308	F6-NURSERY-MAGIC-POP-8W:1633	ICRISAT, Hyderabad, INDIA
485	ICGR 171293	Cross 1/RIL 1	ICGV 91114/GPBD 4//55-437/ICGV 88145///ICGV 6040/ICGV 5155//ICGV 00440/ICGV 00308	F6-NURSERY-MAGIC-POP-8W:1493	ICRISAT, Hyderabad, INDIA
486	ICGR 171476	Cross 4/RIL 4	ICGV 91114/ICGV 5155//ICGV 6040/ICGV 88145///55-437/ICGV 00440//ICGV 00308/GPBD 4	F6-NURSERY-MAGIC-POP-8W:2381	ICRISAT, Hyderabad, INDIA
487	ICGR 171409	Cross 4/RIL 4	ICGV 91114/ICGV 5155//ICGV 6040/ICGV 88145///55-437/ICGV 00440//ICGV 00308/GPBD 4	F6-NURSERY-MAGIC-POP-8W:2078	ICRISAT, Hyderabad, INDIA
488	ICGR 171362	Cross 4/RIL 4	ICGV 91114/ICGV 5155//ICGV 6040/ICGV 88145///55-437/ICGV 00440//ICGV 00308/GPBD 4	F6-NURSERY-MAGIC-POP-8W:1806	ICRISAT, Hyderabad, INDIA
489	ICGR 171266	Cross 1/RIL 1	ICGV 91114/GPBD 4//55-437/ICGV 88145///ICGV 6040/ICGV 5155//ICGV 00440/ICGV 00308	F6-NURSERY-MAGIC-POP-8W:1321	ICRISAT, Hyderabad, INDIA
490	ICGR 171317	Cross 1/RIL 1	ICGV 91114/GPBD 4//55-437/ICGV 88145///ICGV 6040/ICGV 5155//ICGV 00440/ICGV 00308	F6-NURSERY-MAGIC-POP-8W:1617	ICRISAT, Hyderabad, INDIA
491	ICGR 171146	Cross 2/RIL 2	ICGV 91114/ICGV 00308//ICGV 6040/ICGV 00440///55-437/ICGV 5155//GPBD 4/ICGV 88145	F6-NURSERY-MAGIC-POP-8W:739	ICRISAT, Hyderabad, INDIA
492	ICGR 171248	Cross 1/RIL 1	ICGV 91114/GPBD 4//55-437/ICGV 88145///ICGV 6040/ICGV 5155//ICGV 00440/ICGV 00308	F6-NURSERY-MAGIC-POP-8W:1234	ICRISAT, Hyderabad, INDIA
493	ICGR 171492	Cross 5/RIL 5	ICGV 91114/ICGV 88145//55-437/ICGV 00308///ICGV 6040/GPBD 4//ICGV 00440/ICGV 5155	F6-NURSERY-MAGIC-POP-8W:2460	ICRISAT, Hyderabad, INDIA
494	ICGR 171009	Cross 3/RIL 3	ICGV 91114/ICGV 00440//ICGV 6040/ICGV 00308///55-437/GPBD 4//ICGV 5155/ICGV 88145	F6-NURSERY-MAGIC-POP-8W:40	ICRISAT, Hyderabad, INDIA
495	ICGR 171096	Cross 3/RIL 3	ICGV 91114/ICGV 00440//ICGV 6040/ICGV 00308///55-437/GPBD 4//ICGV 5155/ICGV 88145	F6-NURSERY-MAGIC-POP-8W:472	ICRISAT, Hyderabad, INDIA
496	ICGR 171117	Cross 3/RIL 3	ICGV 91114/ICGV 00440//ICGV 6040/ICGV 00308///55-437/GPBD 4//ICGV 5155/ICGV 88145	F6-NURSERY-MAGIC-POP-8W:578	ICRISAT, Hyderabad, INDIA
497	ICGR 171229	Cross 2/RIL 2	ICGV 91114/ICGV 00308//ICGV 6040/ICGV 00440///55-437/ICGV 5155//GPBD 4/ICGV 88145	F6-NURSERY-MAGIC-POP-8W:1160	ICRISAT, Hyderabad, INDIA
498	ICGR 171112	Cross 3/RIL 3	ICGV 91114/ICGV 00440//ICGV 6040/ICGV 00308///55-437/GPBD 4//ICGV 5155/ICGV 88145	F6-NURSERY-MAGIC-POP-8W:545	ICRISAT, Hyderabad, INDIA
499	ICGR 171462	Cross 4/RIL 4	ICGV 91114/ICGV 5155//ICGV 6040/ICGV 88145///55-437/ICGV 00440//ICGV 00308/GPBD 4	F6-NURSERY-MAGIC-POP-8W:2344	ICRISAT, Hyderabad, INDIA
500	ICGR 171316	Cross 1/RIL 1	ICGV 91114/GPBD 4//55-437/ICGV 88145///ICGV 6040/ICGV 5155//ICGV 00440/ICGV 00308	F6-NURSERY-MAGIC-POP-8W:1615	ICRISAT, Hyderabad, INDIA
501	ICGR 171366	Cross 4/RIL 4	ICGV 91114/ICGV 5155//ICGV 6040/ICGV 88145///55-437/ICGV 00440//ICGV 00308/GPBD 4	F6-NURSERY-MAGIC-POP-8W:1832	ICRISAT, Hyderabad, INDIA
502	ICGR 171041	Cross 3/RIL 3	ICGV 91114/ICGV 00440//ICGV 6040/ICGV 00308///55-437/GPBD 4//ICGV 5155/ICGV 88145	F6-NURSERY-MAGIC-POP-8W:201	ICRISAT, Hyderabad, INDIA
503	ICGR 171210	Cross 2/RIL 2	ICGV 91114/ICGV 00308//ICGV 6040/ICGV 00440///55-437/ICGV 5155//GPBD 4/ICGV 88145	F6-NURSERY-MAGIC-POP-8W:1117	ICRISAT, Hyderabad, INDIA
504	ICGR 171205	Cross 2/RIL 2	ICGV 91114/ICGV 00308//ICGV 6040/ICGV 00440///55-437/ICGV 5155//GPBD 4/ICGV 88145	F6-NURSERY-MAGIC-POP-8W:1084	ICRISAT, Hyderabad, INDIA
505	ICGR 171235	Cross 2/RIL 2	ICGV 91114/ICGV 00308//ICGV 6040/ICGV 00440///55-437/ICGV 5155//GPBD 4/ICGV 88145	F6-NURSERY-MAGIC-POP-8W:1184	ICRISAT, Hyderabad, INDIA
506	ICGR 171438	Cross 4/RIL 4	ICGV 91114/ICGV 5155//ICGV 6040/ICGV 88145///55-437/ICGV 00440//ICGV 00308/GPBD 4	F6-NURSERY-MAGIC-POP-8W:2250	ICRISAT, Hyderabad, INDIA
507	ICGR 171313	Cross 1/RIL 1	ICGV 91114/GPBD 4//55-437/ICGV 88145///ICGV 6040/ICGV 5155//ICGV 00440/ICGV 00308	F6-NURSERY-MAGIC-POP-8W:1598	ICRISAT, Hyderabad, INDIA
508	ICGR 171232	Cross 2/RIL 2	ICGV 91114/ICGV 00308//ICGV 6040/ICGV 00440///55-437/ICGV 5155//GPBD 4/ICGV 88145	F6-NURSERY-MAGIC-POP-8W:1176	ICRISAT, Hyderabad, INDIA
509	ICGR 171137	Cross 2/RIL 2	ICGV 91114/ICGV 00308//ICGV 6040/ICGV 00440///55-437/ICGV 5155//GPBD 4/ICGV 88145	F6-NURSERY-MAGIC-POP-8W:674	ICRISAT, Hyderabad, INDIA
510	ICGV 86105	Check	(Nc Ac 537)	ICRISAT	ICRISAT, Hyderabad, INDIA
511	ICGR 171107	Cross 3/RIL 3	ICGV 91114/ICGV 00440//ICGV 6040/ICGV 00308///55-437/GPBD 4//ICGV 5155/ICGV 88145	F6-NURSERY-MAGIC-POP-8W:520	ICRISAT, Hyderabad, INDIA
512	ICGR 171510	Cross 5/RIL 5	ICGV 91114/ICGV 88145//55-437/ICGV 00308///ICGV 6040/GPBD 4//ICGV 00440/ICGV 5155	F6-NURSERY-MAGIC-POP-8W:2524	ICRISAT, Hyderabad, INDIA
513	ICGR 171098	Cross 3/RIL 3	ICGV 91114/ICGV 00440//ICGV 6040/ICGV 00308///55-437/GPBD 4//ICGV 5155/ICGV 88145	F6-NURSERY-MAGIC-POP-8W:478	ICRISAT, Hyderabad, INDIA
514	ICGR 171308	Cross 1/RIL 1	ICGV 91114/GPBD 4//55-437/ICGV 88145///ICGV 6040/ICGV 5155//ICGV 00440/ICGV 00308	F6-NURSERY-MAGIC-POP-8W:1572	ICRISAT, Hyderabad, INDIA
515	ICGR 171056	Cross 3/RIL 3	ICGV 91114/ICGV 00440//ICGV 6040/ICGV 00308///55-437/GPBD 4//ICGV 5155/ICGV 88145	F6-NURSERY-MAGIC-POP-8W:288	ICRISAT, Hyderabad, INDIA
516	ICGR 171530	Cross 5/RIL 5	ICGV 91114/ICGV 88145//55-437/ICGV 00308///ICGV 6040/GPBD 4//ICGV 00440/ICGV 5155	F6-NURSERY-MAGIC-POP-8W:2631	ICRISAT, Hyderabad, INDIA
517	ICGR 171123	Cross 2/RIL 2	ICGV 91114/ICGV 00308//ICGV 6040/ICGV 00440///55-437/ICGV 5155//GPBD 4/ICGV 88145	F6-NURSERY-MAGIC-POP-8W:614	ICRISAT, Hyderabad, INDIA
518	ICGR 171271	Cross 1/RIL 1	ICGV 91114/GPBD 4//55-437/ICGV 88145///ICGV 6040/ICGV 5155//ICGV 00440/ICGV 00308	F6-NURSERY-MAGIC-POP-8W:1342	ICRISAT, Hyderabad, INDIA
519	ICGR 171563	Cross 5/RIL 5	ICGV 91114/ICGV 88145//55-437/ICGV 00308///ICGV 6040/GPBD 4//ICGV 00440/ICGV 5155	F6-NURSERY-MAGIC-POP-8W:2788	ICRISAT, Hyderabad, INDIA
520	ICGR 171598	Cross 5/RIL 5	ICGV 91114/ICGV 88145//55-437/ICGV 00308///ICGV 6040/GPBD 4//ICGV 00440/ICGV 5155	F6-NURSERY-MAGIC-POP-8W:2976	ICRISAT, Hyderabad, INDIA
521	ICGR 171147	Cross 2/RIL 2	ICGV 91114/ICGV 00308//ICGV 6040/ICGV 00440///55-437/ICGV 5155//GPBD 4/ICGV 88145	F6-NURSERY-MAGIC-POP-8W:770	ICRISAT, Hyderabad, INDIA
522	ICGR 171039	Cross 3/RIL 3	ICGV 91114/ICGV 00440//ICGV 6040/ICGV 00308///55-437/GPBD 4//ICGV 5155/ICGV 88145	F6-NURSERY-MAGIC-POP-8W:196	ICRISAT, Hyderabad, INDIA
523	ICGR 171562	Cross 5/RIL 5	ICGV 91114/ICGV 88145//55-437/ICGV 00308///ICGV 6040/GPBD 4//ICGV 00440/ICGV 5155	F6-NURSERY-MAGIC-POP-8W:2778	ICRISAT, Hyderabad, INDIA
524	ICGR 171017	Cross 3/RIL 3	ICGV 91114/ICGV 00440//ICGV 6040/ICGV 00308///55-437/GPBD 4//ICGV 5155/ICGV 88145	F6-NURSERY-MAGIC-POP-8W:62	ICRISAT, Hyderabad, INDIA
525	ICGR 171535	Cross 5/RIL 5	ICGV 91114/ICGV 88145//55-437/ICGV 00308///ICGV 6040/GPBD 4//ICGV 00440/ICGV 5155	F6-NURSERY-MAGIC-POP-8W:2653	ICRISAT, Hyderabad, INDIA
526	ICGR 171528	Cross 5/RIL 5	ICGV 91114/ICGV 88145//55-437/ICGV 00308///ICGV 6040/GPBD 4//ICGV 00440/ICGV 5155	F6-NURSERY-MAGIC-POP-8W:2626	ICRISAT, Hyderabad, INDIA
527	ICGR 171260	Cross 1/RIL 1	ICGV 91114/GPBD 4//55-437/ICGV 88145///ICGV 6040/ICGV 5155//ICGV 00440/ICGV 00308	F6-NURSERY-MAGIC-POP-8W:1286	ICRISAT, Hyderabad, INDIA
528	ICGR 171238	Cross 2/RIL 2	ICGV 91114/ICGV 00308//ICGV 6040/ICGV 00440///55-437/ICGV 5155//GPBD 4/ICGV 88145	F6-NURSERY-MAGIC-POP-8W:1191	ICRISAT, Hyderabad, INDIA
529	ICGR 171105	Cross 3/RIL 3	ICGV 91114/ICGV 00440//ICGV 6040/ICGV 00308///55-437/GPBD 4//ICGV 5155/ICGV 88145	F6-NURSERY-MAGIC-POP-8W:514	ICRISAT, Hyderabad, INDIA
530	ICGR 171552	Cross 5/RIL 5	ICGV 91114/ICGV 88145//55-437/ICGV 00308///ICGV 6040/GPBD 4//ICGV 00440/ICGV 5155	F6-NURSERY-MAGIC-POP-8W:2716	ICRISAT, Hyderabad, INDIA
531	ICGR 171469	Cross 4/RIL 4	ICGV 91114/ICGV 5155//ICGV 6040/ICGV 88145///55-437/ICGV 00440//ICGV 00308/GPBD 4	F6-NURSERY-MAGIC-POP-8W:2356	ICRISAT, Hyderabad, INDIA
532	ICGR 171356	Cross 1/RIL 1	ICGV 91114/GPBD 4//55-437/ICGV 88145///ICGV 6040/ICGV 5155//ICGV 00440/ICGV 00308	F6-NURSERY-MAGIC-POP-8W:1776	ICRISAT, Hyderabad, INDIA
533	ICGR 171387	Cross 4/RIL 4	ICGV 91114/ICGV 5155//ICGV 6040/ICGV 88145///55-437/ICGV 00440//ICGV 00308/GPBD 4	F6-NURSERY-MAGIC-POP-8W:1953	ICRISAT, Hyderabad, INDIA
534	ICGR 171513	Cross 5/RIL 5	ICGV 91114/ICGV 88145//55-437/ICGV 00308///ICGV 6040/GPBD 4//ICGV 00440/ICGV 5155	F6-NURSERY-MAGIC-POP-8W:2554	ICRISAT, Hyderabad, INDIA
535	ICGR 171129	Cross 2/RIL 2	ICGV 91114/ICGV 00308//ICGV 6040/ICGV 00440///55-437/ICGV 5155//GPBD 4/ICGV 88145	F6-NURSERY-MAGIC-POP-8W:632	ICRISAT, Hyderabad, INDIA
536	ICGR 171379	Cross 4/RIL 4	ICGV 91114/ICGV 5155//ICGV 6040/ICGV 88145///55-437/ICGV 00440//ICGV 00308/GPBD 4	F6-NURSERY-MAGIC-POP-8W:1896	ICRISAT, Hyderabad, INDIA
537	ICGR 171558	Cross 5/RIL 5	ICGV 91114/ICGV 88145//55-437/ICGV 00308///ICGV 6040/GPBD 4//ICGV 00440/ICGV 5155	F6-NURSERY-MAGIC-POP-8W:2763	ICRISAT, Hyderabad, INDIA
538	ICGR 171270	Cross 1/RIL 1	ICGV 91114/GPBD 4//55-437/ICGV 88145///ICGV 6040/ICGV 5155//ICGV 00440/ICGV 00308	F6-NURSERY-MAGIC-POP-8W:1339	ICRISAT, Hyderabad, INDIA
539	ICGR 171355	Cross 1/RIL 1	ICGV 91114/GPBD 4//55-437/ICGV 88145///ICGV 6040/ICGV 5155//ICGV 00440/ICGV 00308	F6-NURSERY-MAGIC-POP-8W:1773	ICRISAT, Hyderabad, INDIA
540	ICGR 171050	Cross 3/RIL 3	ICGV 91114/ICGV 00440//ICGV 6040/ICGV 00308///55-437/GPBD 4//ICGV 5155/ICGV 88145	F6-NURSERY-MAGIC-POP-8W:258	ICRISAT, Hyderabad, INDIA
541	ICGR 171083	Cross 3/RIL 3	ICGV 91114/ICGV 00440//ICGV 6040/ICGV 00308///55-437/GPBD 4//ICGV 5155/ICGV 88145	F6-NURSERY-MAGIC-POP-8W:422	ICRISAT, Hyderabad, INDIA
542	ICGR 171029	Cross 3/RIL 3	ICGV 91114/ICGV 00440//ICGV 6040/ICGV 00308///55-437/GPBD 4//ICGV 5155/ICGV 88145	F6-NURSERY-MAGIC-POP-8W:126	ICRISAT, Hyderabad, INDIA
543	ICGR 171148	Cross 2/RIL 2	ICGV 91114/ICGV 00308//ICGV 6040/ICGV 00440///55-437/ICGV 5155//GPBD 4/ICGV 88145	F6-NURSERY-MAGIC-POP-8W:773	ICRISAT, Hyderabad, INDIA
544	ICGR 171507	Cross 5/RIL 5	ICGV 91114/ICGV 88145//55-437/ICGV 00308///ICGV 6040/GPBD 4//ICGV 00440/ICGV 5155	F6-NURSERY-MAGIC-POP-8W:2512	ICRISAT, Hyderabad, INDIA
545	ICGR 171139	Cross 2/RIL 2	ICGV 91114/ICGV 00308//ICGV 6040/ICGV 00440///55-437/ICGV 5155//GPBD 4/ICGV 88145	F6-NURSERY-MAGIC-POP-8W:682	ICRISAT, Hyderabad, INDIA
546	ICGR 171172	Cross 2/RIL 2	ICGV 91114/ICGV 00308//ICGV 6040/ICGV 00440///55-437/ICGV 5155//GPBD 4/ICGV 88145	F6-NURSERY-MAGIC-POP-8W:899	ICRISAT, Hyderabad, INDIA
547	ICGR 171297	Cross 1/RIL 1	ICGV 91114/GPBD 4//55-437/ICGV 88145///ICGV 6040/ICGV 5155//ICGV 00440/ICGV 00308	F6-NURSERY-MAGIC-POP-8W:1502	ICRISAT, Hyderabad, INDIA
548	ICGR 171371	Cross 4/RIL 4	ICGV 91114/ICGV 5155//ICGV 6040/ICGV 88145///55-437/ICGV 00440//ICGV 00308/GPBD 4	F6-NURSERY-MAGIC-POP-8W:1861	ICRISAT, Hyderabad, INDIA
549	ICGR 171414	Cross 4/RIL 4	ICGV 91114/ICGV 5155//ICGV 6040/ICGV 88145///55-437/ICGV 00440//ICGV 00308/GPBD 4	F6-NURSERY-MAGIC-POP-8W:2119	ICRISAT, Hyderabad, INDIA
550	ICGV6420	Check	ICGV 87846 × ICGV 99240	ICRISAT	ICRISAT, Hyderabad, INDIA
551	ICGR 171550	Cross 5/RIL 5	ICGV 91114/ICGV 88145//55-437/ICGV 00308///ICGV 6040/GPBD 4//ICGV 00440/ICGV 5155	F6-NURSERY-MAGIC-POP-8W:2714	ICRISAT, Hyderabad, INDIA
552	ICGR 171526	Cross 5/RIL 5	ICGV 91114/ICGV 88145//55-437/ICGV 00308///ICGV 6040/GPBD 4//ICGV 00440/ICGV 5155	F6-NURSERY-MAGIC-POP-8W:2623	ICRISAT, Hyderabad, INDIA
553	ICGR 171005	Cross 3/RIL 3	ICGV 91114/ICGV 00440//ICGV 6040/ICGV 00308///55-437/GPBD 4//ICGV 5155/ICGV 88145	F6-NURSERY-MAGIC-POP-8W:23	ICRISAT, Hyderabad, INDIA
554	ICGR 171378	Cross 4/RIL 4	ICGV 91114/ICGV 5155//ICGV 6040/ICGV 88145///55-437/ICGV 00440//ICGV 00308/GPBD 4	F6-NURSERY-MAGIC-POP-8W:1888	ICRISAT, Hyderabad, INDIA
555	ICGR 171247	Cross 1/RIL 1	ICGV 91114/GPBD 4//55-437/ICGV 88145///ICGV 6040/ICGV 5155//ICGV 00440/ICGV 00308	F6-NURSERY-MAGIC-POP-8W:1233	ICRISAT, Hyderabad, INDIA
556	ICGR 171529	Cross 5/RIL 5	ICGV 91114/ICGV 88145//55-437/ICGV 00308///ICGV 6040/GPBD 4//ICGV 00440/ICGV 5155	F6-NURSERY-MAGIC-POP-8W:2628	ICRISAT, Hyderabad, INDIA
557	ICGR 171081	Cross 3/RIL 3	ICGV 91114/ICGV 00440//ICGV 6040/ICGV 00308///55-437/GPBD 4//ICGV 5155/ICGV 88145	F6-NURSERY-MAGIC-POP-8W:416	ICRISAT, Hyderabad, INDIA
558	ICGR 171547	Cross 5/RIL 5	ICGV 91114/ICGV 88145//55-437/ICGV 00308///ICGV 6040/GPBD 4//ICGV 00440/ICGV 5155	F6-NURSERY-MAGIC-POP-8W:2701	ICRISAT, Hyderabad, INDIA
559	ICGR 171520	Cross 5/RIL 5	ICGV 91114/ICGV 88145//55-437/ICGV 00308///ICGV 6040/GPBD 4//ICGV 00440/ICGV 5155	F6-NURSERY-MAGIC-POP-8W:2579	ICRISAT, Hyderabad, INDIA
560	ICGR 171212	Cross 2/RIL 2	ICGV 91114/ICGV 00308//ICGV 6040/ICGV 00440///55-437/ICGV 5155//GPBD 4/ICGV 88145	F6-NURSERY-MAGIC-POP-8W:1127	ICRISAT, Hyderabad, INDIA
561	ICGR 171119	Cross 3/RIL 3	ICGV 91114/ICGV 00440//ICGV 6040/ICGV 00308///55-437/GPBD 4//ICGV 5155/ICGV 88145	F6-NURSERY-MAGIC-POP-8W:589	ICRISAT, Hyderabad, INDIA
562	ICGR 171433	Cross 4/RIL 4	ICGV 91114/ICGV 5155//ICGV 6040/ICGV 88145///55-437/ICGV 00440//ICGV 00308/GPBD 4	F6-NURSERY-MAGIC-POP-8W:2222	ICRISAT, Hyderabad, INDIA
563	ICGR 171040	Cross 3/RIL 3	ICGV 91114/ICGV 00440//ICGV 6040/ICGV 00308///55-437/GPBD 4//ICGV 5155/ICGV 88145	F6-NURSERY-MAGIC-POP-8W:199	ICRISAT, Hyderabad, INDIA
564	ICGR 171389	Cross 4/RIL 4	ICGV 91114/ICGV 5155//ICGV 6040/ICGV 88145///55-437/ICGV 00440//ICGV 00308/GPBD 4	F6-NURSERY-MAGIC-POP-8W:1966	ICRISAT, Hyderabad, INDIA
565	ICGR 171082	Cross 3/RIL 3	ICGV 91114/ICGV 00440//ICGV 6040/ICGV 00308///55-437/GPBD 4//ICGV 5155/ICGV 88145	F6-NURSERY-MAGIC-POP-8W:419	ICRISAT, Hyderabad, INDIA
566	ICGR 171033	Cross 3/RIL 3	ICGV 91114/ICGV 00440//ICGV 6040/ICGV 00308///55-437/GPBD 4//ICGV 5155/ICGV 88145	F6-NURSERY-MAGIC-POP-8W:161	ICRISAT, Hyderabad, INDIA
567	ICGR 171255	Cross 1/RIL 1	ICGV 91114/GPBD 4//55-437/ICGV 88145///ICGV 6040/ICGV 5155//ICGV 00440/ICGV 00308	F6-NURSERY-MAGIC-POP-8W:1262	ICRISAT, Hyderabad, INDIA
568	ICGR 171046	Cross 3/RIL 3	ICGV 91114/ICGV 00440//ICGV 6040/ICGV 00308///55-437/GPBD 4//ICGV 5155/ICGV 88145	F6-NURSERY-MAGIC-POP-8W:223	ICRISAT, Hyderabad, INDIA
569	ICGR 171499	Cross 5/RIL 5	ICGV 91114/ICGV 88145//55-437/ICGV 00308///ICGV 6040/GPBD 4//ICGV 00440/ICGV 5155	F6-NURSERY-MAGIC-POP-8W:2479	ICRISAT, Hyderabad, INDIA
570	ICGR 171554	Cross 5/RIL 5	ICGV 91114/ICGV 88145//55-437/ICGV 00308///ICGV 6040/GPBD 4//ICGV 00440/ICGV 5155	F6-NURSERY-MAGIC-POP-8W:2724	ICRISAT, Hyderabad, INDIA
571	ICGR 171454	Cross 4/RIL 4	ICGV 91114/ICGV 5155//ICGV 6040/ICGV 88145///55-437/ICGV 00440//ICGV 00308/GPBD 4	F6-NURSERY-MAGIC-POP-8W:2316	ICRISAT, Hyderabad, INDIA
572	ICGR 171162	Cross 2/RIL 2	ICGV 91114/ICGV 00308//ICGV 6040/ICGV 00440///55-437/ICGV 5155//GPBD 4/ICGV 88145	F6-NURSERY-MAGIC-POP-8W:861	ICRISAT, Hyderabad, INDIA
573	ICGR 171311	Cross 1/RIL 1	ICGV 91114/GPBD 4//55-437/ICGV 88145///ICGV 6040/ICGV 5155//ICGV 00440/ICGV 00308	F6-NURSERY-MAGIC-POP-8W:1580	ICRISAT, Hyderabad, INDIA
574	ICGR 171495	Cross 5/RIL 5	ICGV 91114/ICGV 88145//55-437/ICGV 00308///ICGV 6040/GPBD 4//ICGV 00440/ICGV 5155	F6-NURSERY-MAGIC-POP-8W:2464	ICRISAT, Hyderabad, INDIA
ICGV, ICRISAT Groundnut Variety; ICG, ICRISAT Groundnut Research; ICGS, ICRISAT groundnut selection; TNAU, Tamil Nadu Agriculture University; JAU, Junagadh Agriculture University; UAS, University of Agriculture Sciences; MPKV, Mahatma Phule Krishi Vidyapeeth; PAU, Punjab Agriculture University; GG, Gujarat groundnut
ICRISAT: International Crops Research Institute for the Semi-Arid and Tropics
